# Supplementary material
Source: PubMed Central journal article supplement (PMC8849040)
Supplement: NIHMS1770405-supplement-Supporting_Information.pdf [file NIHMS1770405-supplement-Supporting_Information.pdf]

## Supporting Information:

### Multiplexed CuAAC-Suzuki–Miyaura labelling for tandem activity-based chemoproteomic profiling

Jian Cao<sup>1</sup>, Lisa M. Boatner<sup>1,2</sup>, Heta S. Desai<sup>1,3</sup>, Nikolas Burton<sup>1,2</sup>, Ernest Armenta<sup>1,2</sup>, Neil J. Chan<sup>1,2</sup>, José O. Castellón<sup>1,3</sup>, Keriann M. Backus<sup>1,2,3,4,5,6\*</sup>

1. Department of Biological Chemistry, David Geffen School of Medicine, UCLA, Los Angeles, CA, 90095, USA.

2. Department of Chemistry and Biochemistry, UCLA, Los Angeles, CA, 90095, USA.

3. Molecular Biology Institute, UCLA, Los Angeles, CA, 90095, USA.

4. DOE Institute for Genomics and Proteomics, UCLA, Los Angeles, CA, 90095, USA.

5. Jonsson Comprehensive Cancer Center, UCLA, Los Angeles, CA, 90095, USA.

6. Eli and Edythe Broad Center of Regenerative Medicine and Stem Cell Research, UCLA, Los Angeles, CA, 90095

\* Corresponding Author: kbackus@mednet.ucla.edu.

## Contents:

|     |                                                |     |
|-----|------------------------------------------------|-----|
| (A) | Supplementary Figures                          | S2  |
| (B) | Biological Methods                             | S26 |
| (C) | General Synthetic Methods                      | S35 |
| (D) | Catalyst Preparation and Reaction Screening    | S35 |
| (E) | Synthesis of Probes                            | S37 |
| (G) | <sup>1</sup> H and <sup>13</sup> C NMR spectra | S49 |
| (H) | References                                     | S94 |

(A) Supplementary Figures.

**Table S1.** Sensitivity of model Suzuki–Miyaura cross-coupling reaction to additives. Reactions were conducted at 37 °C in phosphate-buffered saline (PBS) with 10% DMSO as co-solvent, a palladium loading of 50 mol%, and with addition of glutathione (1 mM), BSA (1 mg/mL), or HEK293T lysate (1 mg/mL). Peak areas reflect areas under the curve from LC-MS analysis. Calculated conversion (%) is shown in **Figure 1**.

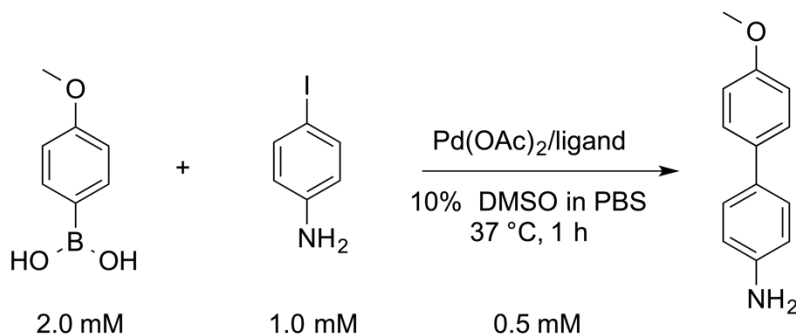

| Entry | Ligand                           | Peak Area |     |      |        |
|-------|----------------------------------|-----------|-----|------|--------|
|       |                                  | -         | GSH | BSA  | Lysate |
| 1     | sSPhos                           | 2041      | 531 | 1174 | 531    |
| 2     | (P( <i>t</i> -Bu) <sub>3</sub> ) | 1839      | 696 | 1350 | 696    |
| 3     | DavePhos                         | 1714      | 98  | 723  | 98     |
| 4     | ADHP                             | 803       | 69  | 70   | 69     |
| 5     | DMADHP                           | 1838      | 69  | 200  | 69     |

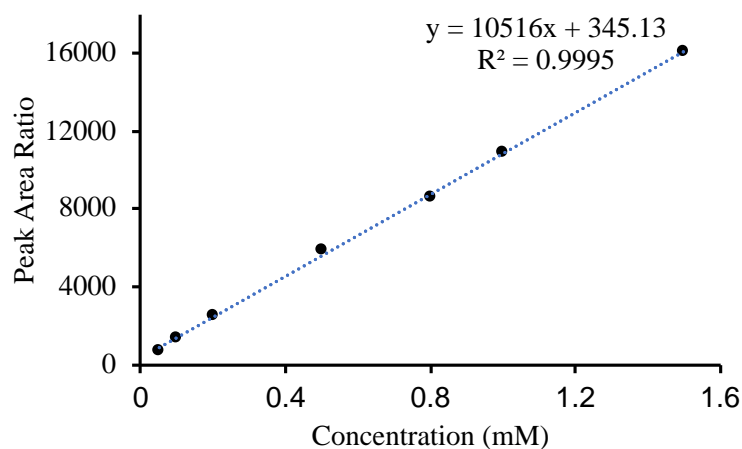

**Figure S1.** Standard curve generated from LC-MS analysis of the indicated concentrations of model cross-coupling product 4-(4-methoxyphenyl)aniline.

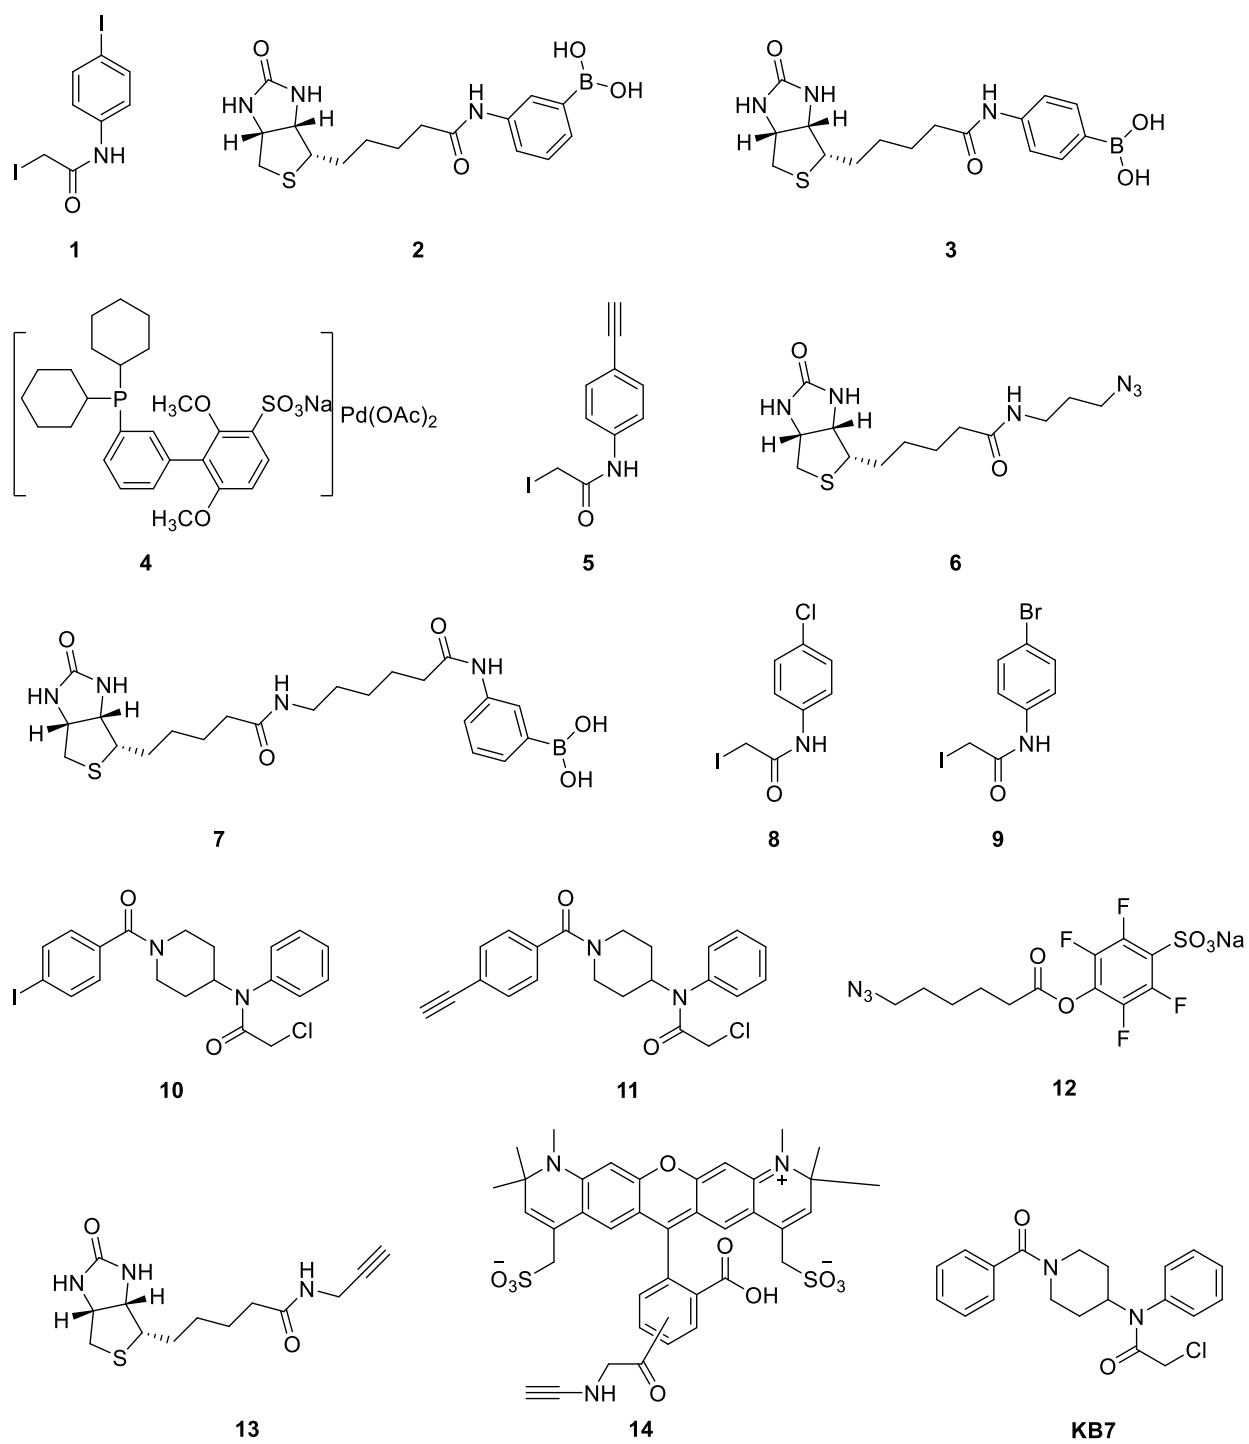

**Scheme S1.** Structures of probes and reagents for dual Suzuki-Miyaura-CuAAC

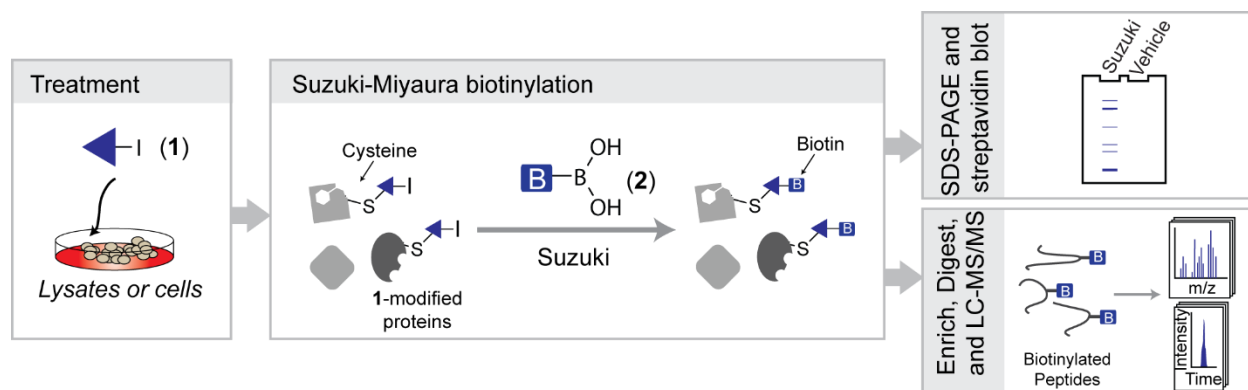

**Figure S2.** General workflow for Suzuki–Miyaura biotinylation of cellular lysates and detection by streptavidin blot or by LC-MS/MS.

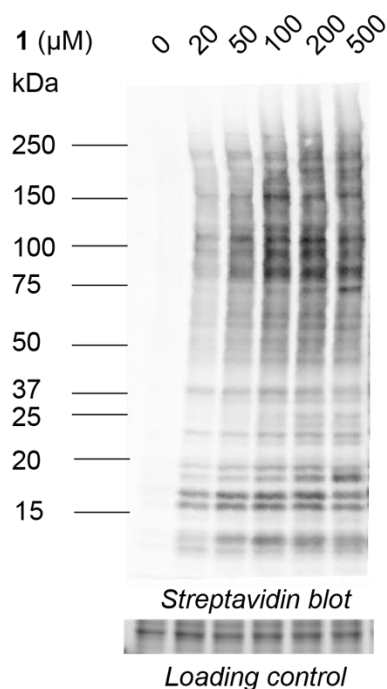

**Figure S3.** Dose-dependent proteome labeling by probe **1**. HEK293T lysates were labeled with indicated concentrations of probe **1** or vehicle (DMSO) at room temperature (RT) for 1h. The samples were then subjected to Suzuki–Miyaura cross-coupling conjugation to **2** (2 mM) in the presence of **4** (1 mM) for 1h at 50 °C. The labeled proteins were resolved by SDS-PAGE gel and labeling was visualized by streptavidin blot. Loading control was generated using stain-free imaging.<sup>1</sup>

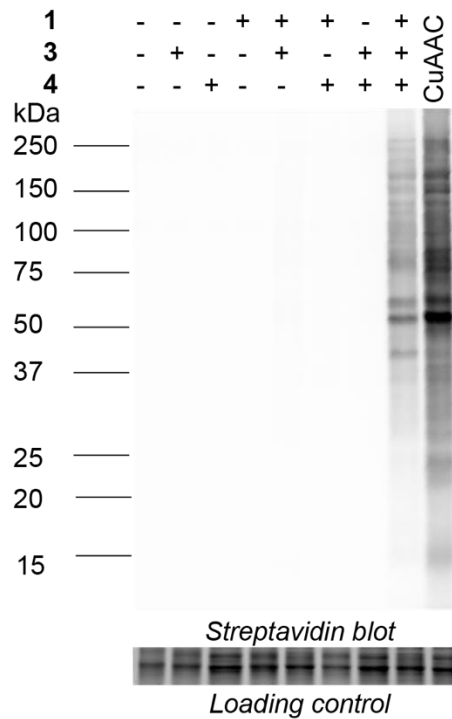

**Figure S4.** Gel-based ABPP using Suzuki–Miyaura cross coupling with 4-biotin-boronic acid **3**. Degassed HEK293T lysates were labeled with probe **1** (200  $\mu$ M) or vehicle (DMSO) for 1h, following which the samples were subjected to Suzuki–Miyaura cross-coupling to **3** (2 mM) in the presence of **4** (1 mM) for 3h at RT. For CuAAC labeling, lysates were labeled with probe **5** (200  $\mu$ M) for 1h at RT, followed by CuAAC conjugation to **6** (400  $\mu$ M) for another hour at RT. The labeled proteins were resolved by SDS-PAGE gel and biotinylation visualized by streptavidin blot.

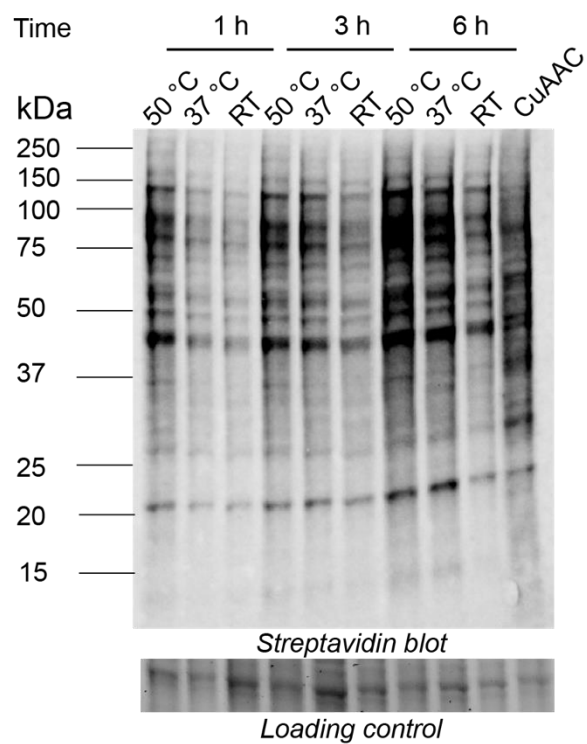

**Figure S5.** Time- and temperature-dependent labeling. HEK293T lysates were labeled with probe **1** (200  $\mu$ M) at RT for 1h. The samples were then subjected to Suzuki–Miyaura cross-coupling to **3** (2 mM) in the presence of **4** (1 mM), varying the various temperatures (RT, 37 °C, or 50 °C) and time (1h, 3h, or 6h). The labeled proteins were resolved by SDS-PAGE gel and biotinylation was visualized by streptavidin blot.

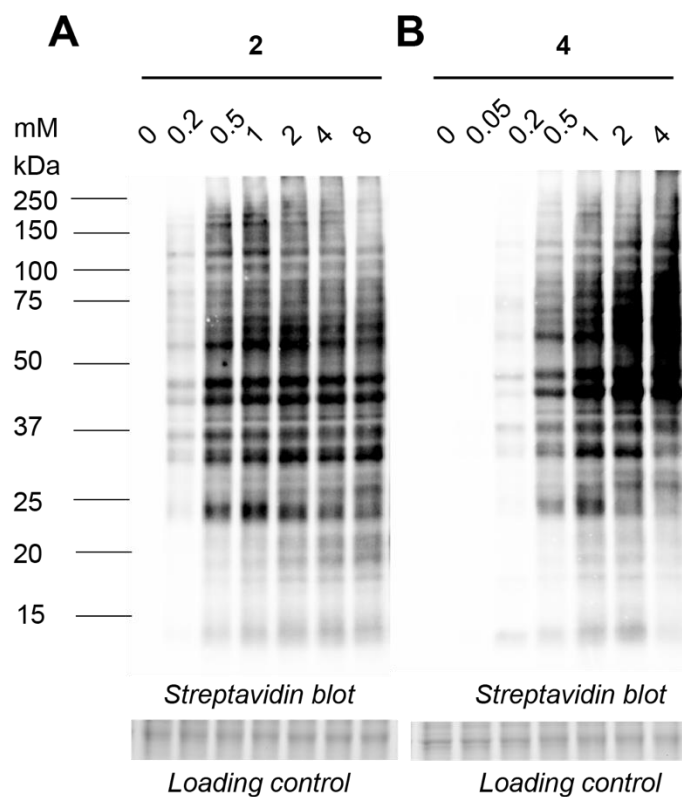

**Figure S6.** Concentration-dependent labeling by biotin-boronic acid **2** and catalyst **4**. HEK293T lysates were treated with probe **1** (200  $\mu$ M) at RT for 1h. The samples were then subjected to Suzuki–Miyaura cross-coupling to (A) **2** (0.2, 0.5, 1, 2, 4 and 8 mM) in the presence of **4** (1 mM) or (B) **2** (2 mM) in the presence of **4** (0.05, 0.2, 1, 2 and 4 mM), both for 1h at 50 °C. The labeled proteins were resolved by SDS-PAGE gel and biotinylation was visualized by streptavidin blot.

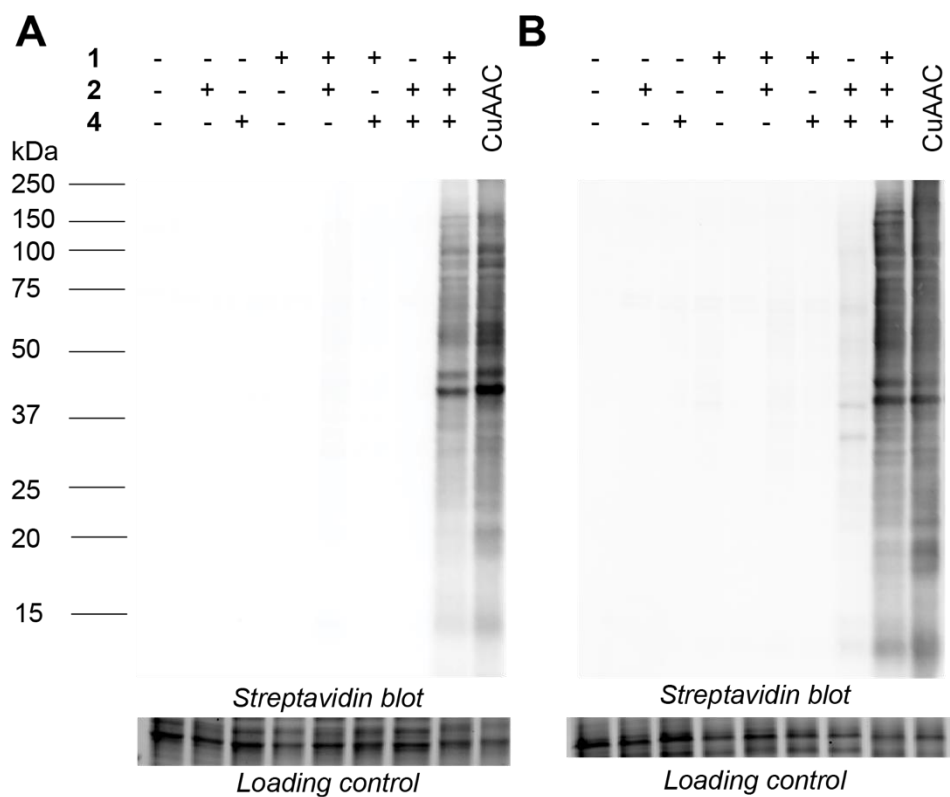

**Figure S7.** Sample degassing. Suzuki–Miyaura labeling of (A) cellular lysates degassed by freeze pump thaw and (B) cellular lysates processed using standard lysis procedure. HEK293T lysates were treated with probe **1** (200  $\mu$ M) or vehicle (DMSO) for 1h at RT, after which the samples were subjected to Suzuki–Miyaura cross-coupling to **2** (2 mM) in the presence of **4** (1 mM), and both sets of reactions were incubated for 3h at 37  $^{\circ}$ C. The labeled proteins were resolved by SDS-PAGE gel and biotinylation was visualized by streptavidin blot.



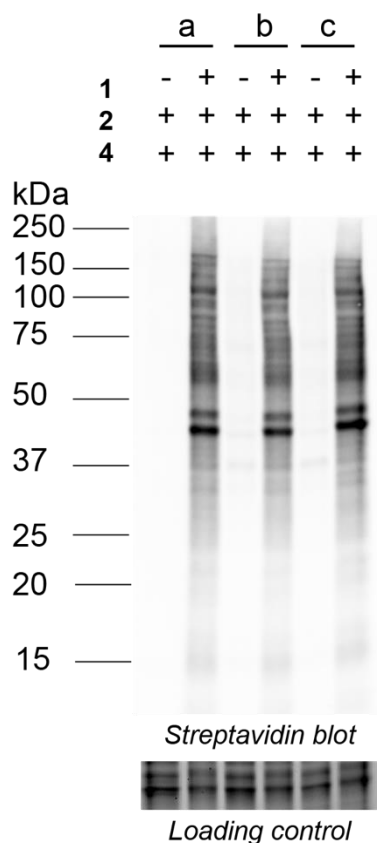

**Figure S8.** Evaluation of catalyst **4** from different batches. a: freshly made, b: stored at RT for one month, c: stored at RT for two months. HEK293T lysates were labeled with probe **1** (200  $\mu$ M) or vehicle (DMSO) for 1h at RT. The samples were then subjected to Suzuki–Miyaura cross-coupling to biotin-boronic acid **2** (2 mM) in the presence of **4** (1 mM) for 3h at 37 °C. The labeled proteins were resolved by SDS-PAGE gel and biotinylation was visualized by streptavidin blot.

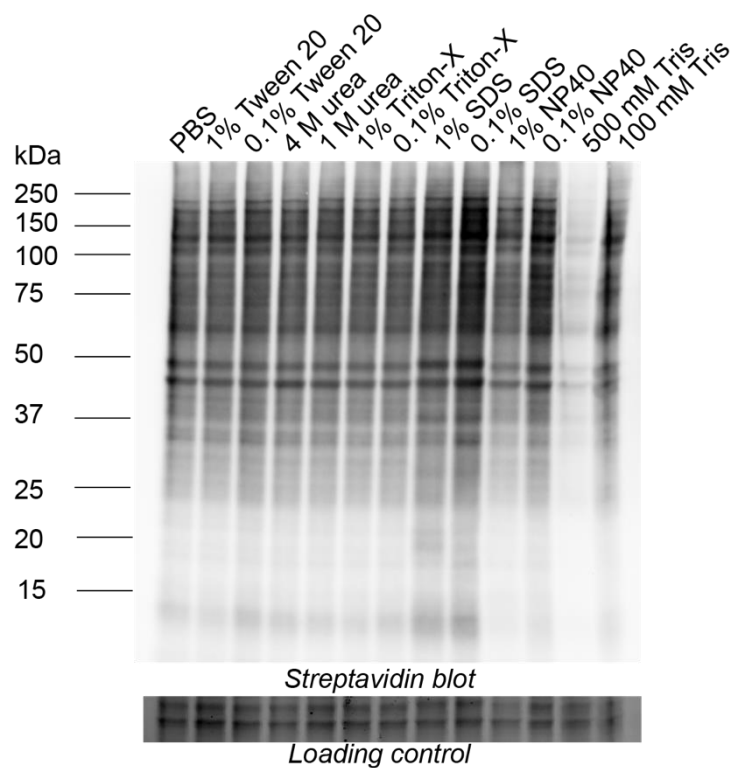

**Figure S9.** Suzuki–Miyaura labeling in the presence of detergents, denaturants, and free amines. HEK293T lysates (25  $\mu$ L) were treated with probe **1** (200  $\mu$ M) for 1h at RT. Additives in PBS (25  $\mu$ L of a 2 $\times$  stock) were then added into each sample to the indicated final concentrations. Next, samples were subjected to Suzuki–Miyaura cross-coupling to **2** (2 mM) in the presence of **4** (1 mM) for 3h at 37  $^{\circ}$ C. The labeled proteins were resolved by SDS-PAGE gel and biotinylation was visualized by streptavidin blot.

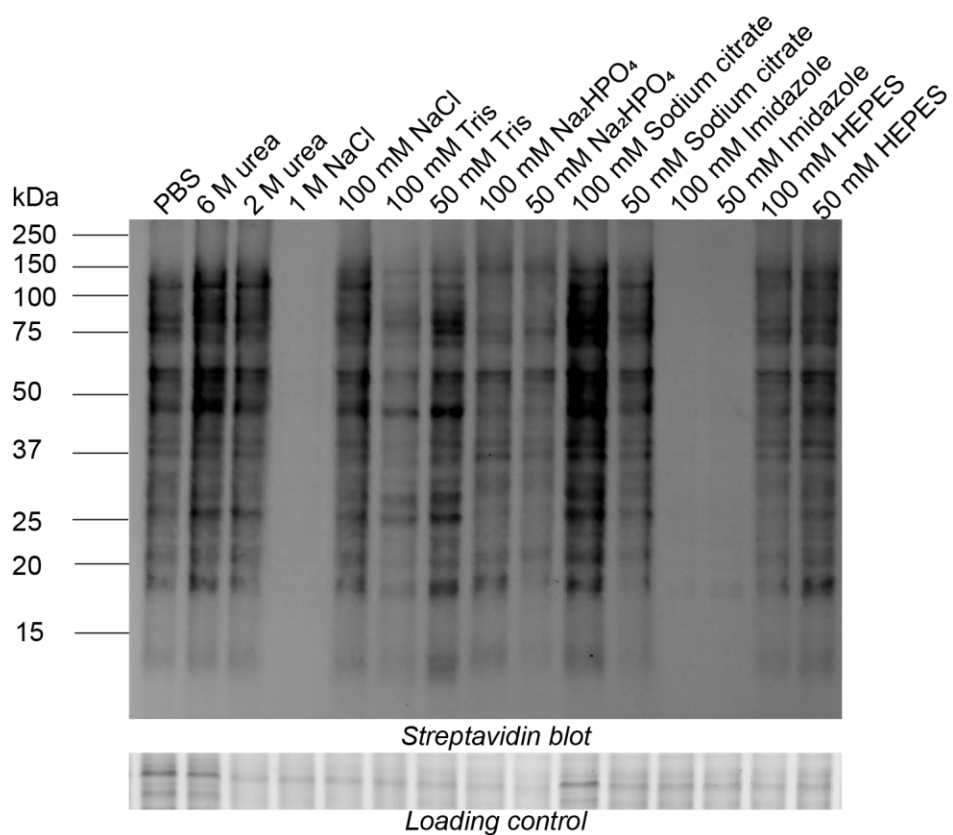

**Figure S10.** Suzuki–Miyaura labeling in the presence of denaturants, chaotropic agents, salts, and free amines. HEK293T lysates (25  $\mu$ L) were treated with probe **1** (200  $\mu$ M) for 1h at RT. Additives in PBS (25  $\mu$ L of a 2 $\times$  stock) were then added into each sample to the indicated final concentrations. Next, samples were subjected to Suzuki–Miyaura cross-coupling to **3** (2 mM) in the presence of **4** (1 mM) for 1h at 50  $^{\circ}$ C. The labeled proteins were resolved by SDS-PAGE gel and biotinylation was visualized by streptavidin blot.

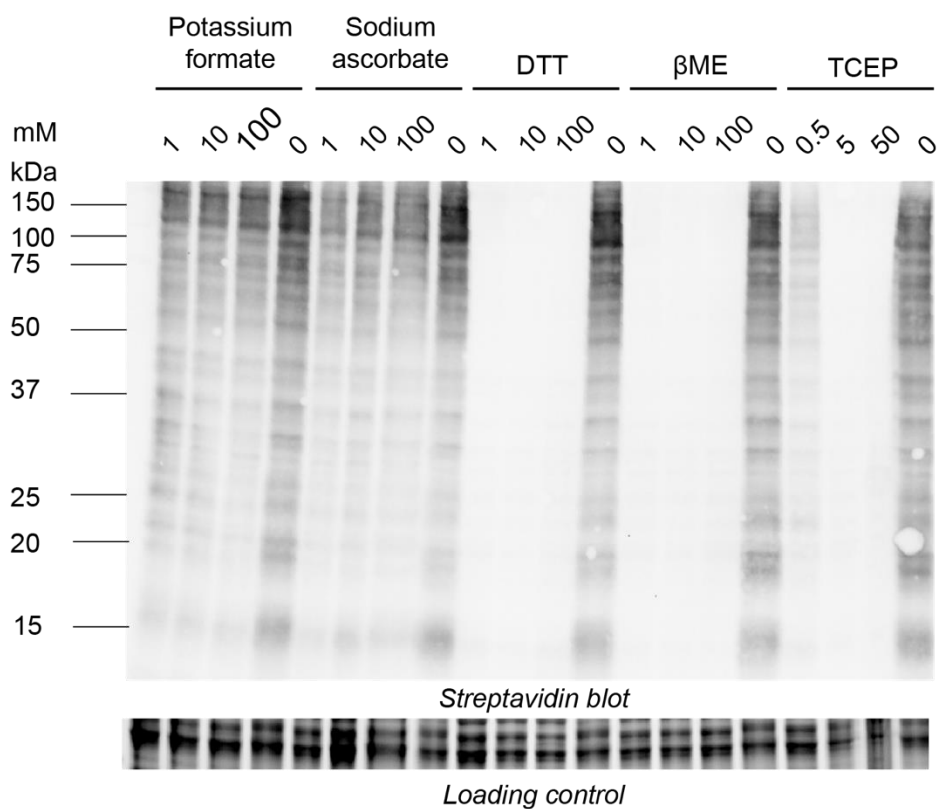

**Figure S11.** Suzuki–Miyaura labeling in the presence of detergents, denaturants, and free amines. HEK293T lysates were treated with probe **1** (200 μM) for 1h at RT. Reducing agents were then added to each sample at the indicated final concentrations. Next, samples were subjected to Suzuki–Miyaura cross-coupling **2** (2 mM) in the presence of **4** (1 mM) for 1h at 50 °C. The labeled proteins were resolved by SDS-PAGE gel and biotinylation was visualized by streptavidin blot.

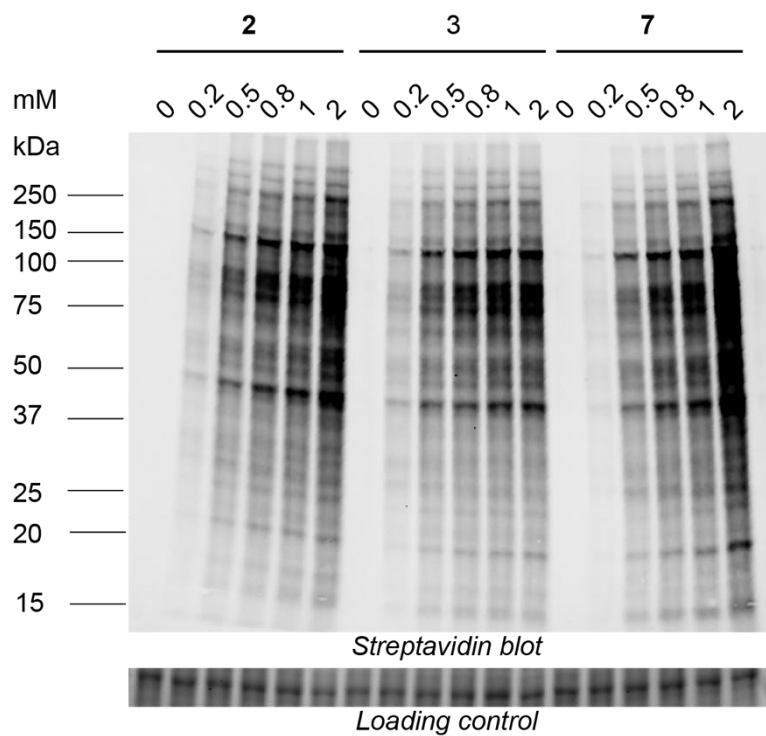

**Figure S12.** Comparison of biotin-boronic acids (**2**, **3** and **7**) for Suzuki–Miyaura cross-coupling. HEK293T lysates were labeled with **1** (200  $\mu$ M) for 1h at RT. Next, samples were subjected to Suzuki–Miyaura cross-coupling to biotin-boronic acids **2**, **3**, or **7** with the indicated concentration or vehicle (DMSO) in the presence of **4** (1 mM) for 1h at 50 °C. The labeled proteins were resolved by SDS-PAGE gel and biotinylation was visualized by streptavidin blot.

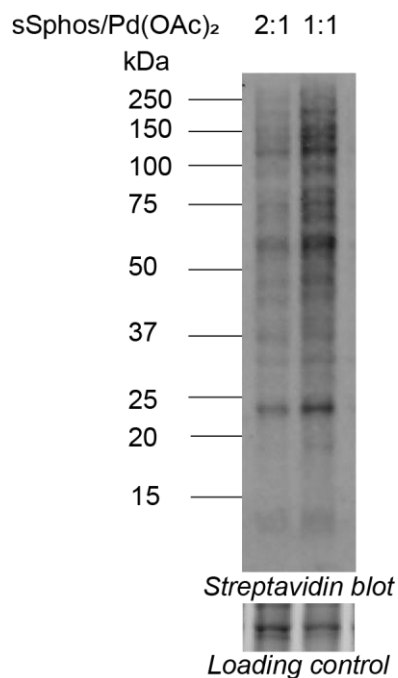

**Figure S13.** Evaluation of palladium to ligand ratio for Suzuki–Miyaura cross-coupling. HEK293T lysates were labeled with **1** (200  $\mu$ M) for 1h at RT. Next, samples were subjected to Suzuki–Miyaura cross-coupling to **3** (2 mM) in the presence of **4** (1 mM) for 1h at 50  $^{\circ}$ C. The labeled proteins were resolved by SDS-PAGE gel and biotinylation was visualized by streptavidin blot. Catalysts were prepared by heating Pd(OAc)<sub>2</sub> (0.5 mmol) with different amounts of sSPhos (1 mmol or 0.5 mmol) in DMA for 30 min at 50  $^{\circ}$ C.

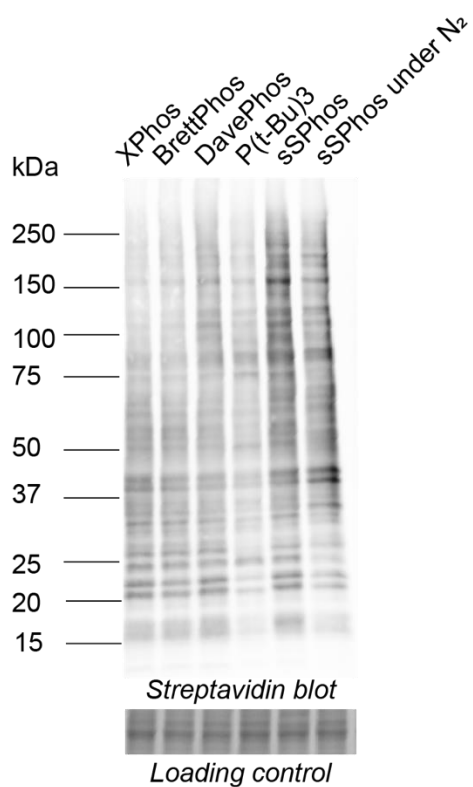

**Figure S14.** Scope of ligands compatible with gel-based Suzuki–Miyaura cross-coupling. HEK293T lysates were labeled with **1** (200  $\mu$ M) for 1h at RT. Next, samples were subjected to Suzuki–Miyaura cross-coupling to biotin-boronic acid **2** (2 mM) in the presence of the indicated catalysts (1 mM) for 1h at 50  $^{\circ}$ C. The labeled proteins were resolved by SDS-PAGE gel and biotinylation was visualized by streptavidin blot. Catalysts were prepared by heating 0.5 mmol Pd(OAc)<sub>2</sub> with the indicated ligands (0.5 mmol) in DMA for 30 min at 50  $^{\circ}$ C. sSPhos under N<sub>2</sub> indicates that the labeling was performed under nitrogen atmosphere.

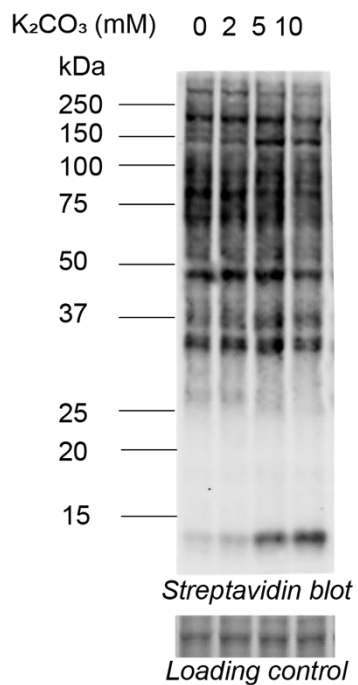

**Figure S15.** Suzuki–Miyaura cross-coupling in the presence of base ( $K_2CO_3$ ). HEK293T lysates were labeled with **1** (200  $\mu$ M) for 1h at RT. Next, samples were subjected to Suzuki–Miyaura cross-coupling to biotin-boronic acid **3** (2 mM) in the presence of **4** (1 mM) and with the indicated concentration of  $K_2CO_3$  for 1h at 50 °C. The labeled proteins were resolved by SDS-PAGE gel and biotinylation was visualized by streptavidin blot.



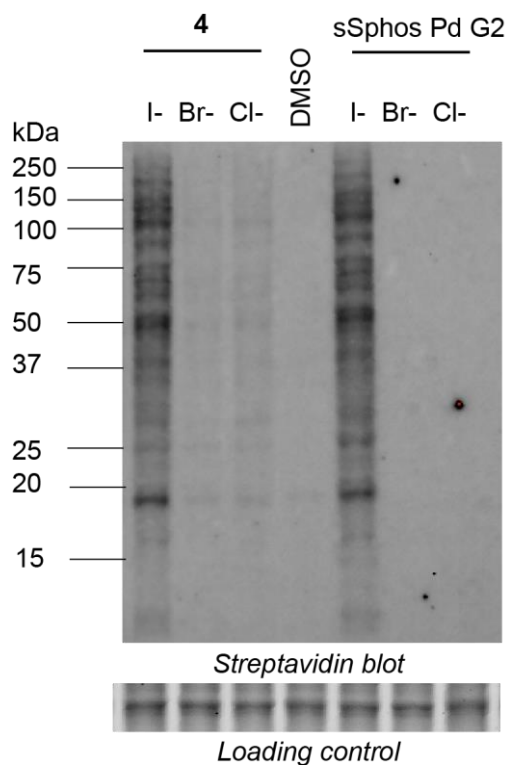

**Figure S16.** Evaluation of Suzuki–Miyaura labeling using chloro and bromo modified probes. HEK293T lysates were labeled with **1**, **8**, or **9** (200  $\mu$ M) or vehicle (DMSO) for 1h at RT. Next, samples were subjected to Suzuki–Miyaura cross-coupling to biotin-boronic acid **3** (2 mM) in the presence of the indicated catalysts (1 mM) for 1h at 50  $^{\circ}$ C. The labeled proteins were resolved by SDS-PAGE gel and biotinylation was visualized by streptavidin blot. Precatalysts were mixed with 10 equiv.  $K_2CO_3$  for 10 min at 70  $^{\circ}$ C immediately prior to lysate labeling.

**Table S2.** Assessment of precatalyst compatibility with PBS and aryl halogens. Model reaction between 4-iodo-, 4-bromo- or 4-iodoaniline and 4-methoxyphenyl boronic acid was monitored by LC-MS in the presence of the indicated catalyst and base.

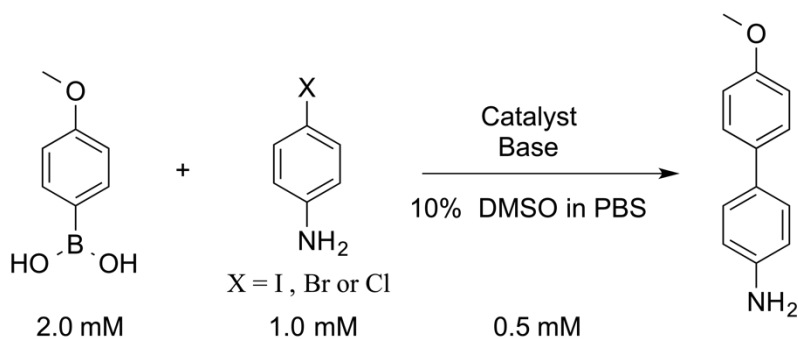

| Entry | Catalyst         | Base                                 | Condition  | Yield (%) |    |    |
|-------|------------------|--------------------------------------|------------|-----------|----|----|
|       |                  |                                      |            | I         | Br | Cl |
| 1     | 4                | 2 mM K <sub>2</sub> CO <sub>3</sub>  | 37 °C, 1 h | 85        | 12 | 0  |
| 2     | sSPhos Pd G2     | 2 mM K <sub>2</sub> CO <sub>3</sub>  | 37 °C, 1 h | 96        | 19 | 0  |
| 3     | XPhos Pd G3      | 2 mM K <sub>2</sub> CO <sub>3</sub>  | 37 °C, 1 h | 94        | 42 | 0  |
| 4     | BrettPhos Pd G3  | 2 mM K <sub>2</sub> CO <sub>3</sub>  | 37 °C, 1 h | 92        | 6  | 0  |
| 5     | DavePhos Pd G3   | 2 mM K <sub>2</sub> CO <sub>3</sub>  | 37 °C, 1 h | 89        | 8  | 0  |
| 6     | RuPhos Pd G3     | 2 mM K <sub>2</sub> CO <sub>3</sub>  | 37 °C, 1 h | 91        | 20 | 0  |
| 7     | N-XantPhos G3    | 2 mM K <sub>2</sub> CO <sub>3</sub>  | 37 °C, 1 h | 94        | 9  | 0  |
| 8     | XantPhos G4      | 2 mM K <sub>2</sub> CO <sub>3</sub>  | 37 °C, 1 h | 92        | 38 | 0  |
| 9     | PEPPSI™-IPr      | 2 mM K <sub>2</sub> CO <sub>3</sub>  | 37 °C, 1 h | 95        | 27 | 0  |
| 10    | (NHC)Pd(allyl)Cl | 2 mM K <sub>2</sub> CO <sub>3</sub>  | 37 °C, 1 h | ~100      | 2  | 0  |
| 11    | sSPhos Pd G2     | 20 mM K <sub>2</sub> CO <sub>3</sub> | 37 °C, 1 h | N.A.      | 92 | 7% |
| 12    | sSPhos Pd G2     | 100 mM CsOH                          | 80 °C, 1 h | N.A.      | 96 | 87 |

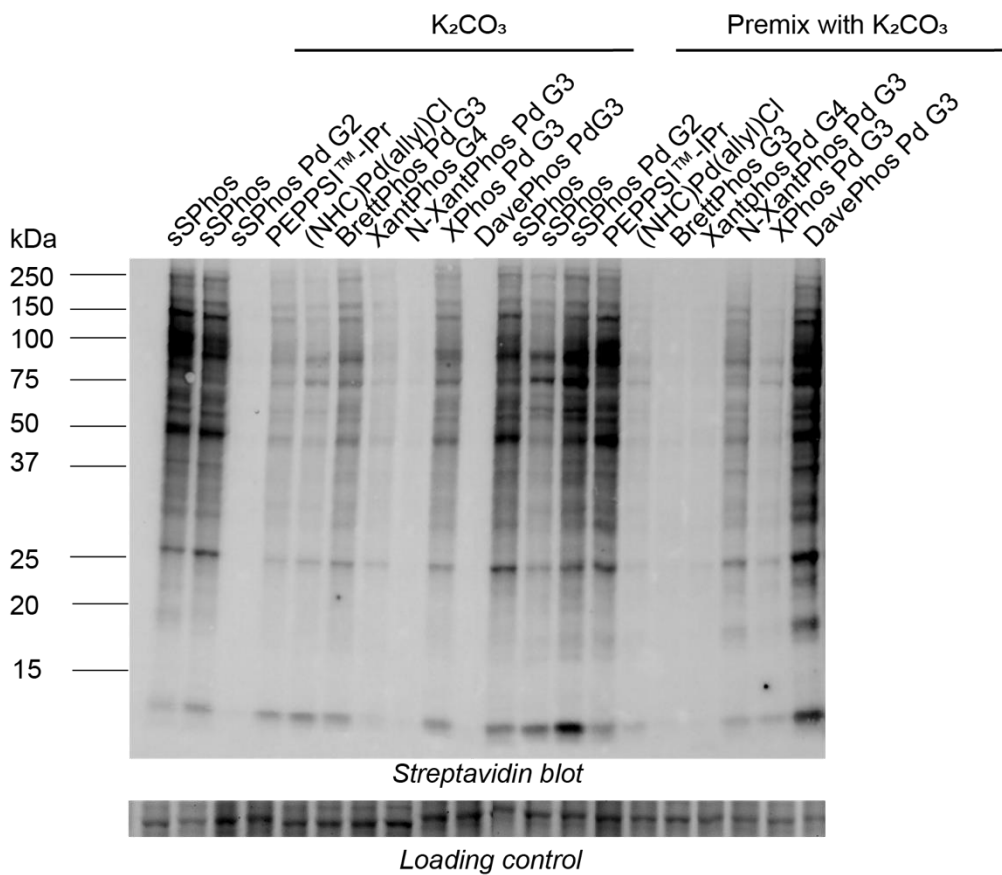

**Figure S17.** Evaluation of precatalysts for gel-based Suzuki–Miyaura labeling. HEK293T lysates were labeled with **1** (200  $\mu$ M) for 1h at RT. Next, samples were subjected to Suzuki–Miyaura cross-coupling to biotin-boronic acid **3** (2 mM) in the presence of the indicated catalysts (1 mM) for 1h at 50  $^{\circ}$ C. The labeled proteins were resolved by SDS-PAGE gel and biotinylation was visualized by streptavidin blot. For  $K_2CO_3$  treated samples, 10 mM of  $K_2CO_3$  was added into reaction prior to addition of the indicated precatalyst. For the premixed samples, precatalyst or **4** in DMSO or DMA was mixed (1:1 volume/volume) with  $K_2CO_3$  (10 mM stock in water), and the resulting mixture was heated for 10 min at 75  $^{\circ}$ C. Samples only treated with **4** without adding or premixing with  $K_2CO_3$  were also included.

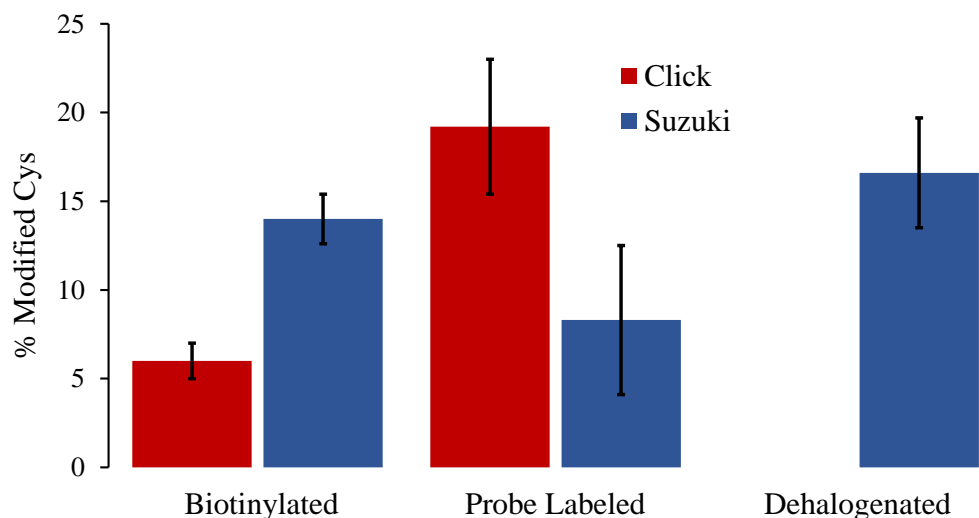

**Figure S18.** Comparison of Suzuki–Miyaura and click labeling of the recombinant protein BSA. BSA in PBS was labelled with **5** (400  $\mu$ M) or **1** (400  $\mu$ M) for 1h, followed by CuAAC (400  $\mu$ M **6**, 100  $\mu$ M TBTA, 1 mM CuSO<sub>4</sub> and 1 mM TCEP) at RT for another 1 h or Suzuki–Miyaura cross-coupling (1 mM **4** and 2 mM of **2**) for 3h at 50 °C. The protein was then precipitated (chloroform/methanol), reduced, alkylated, digested, subjected to LC-MS/MS analysis, and the data searched using differential modifications for biotinylated, probe-labeled and dehalogenation ( $N= 3$  for each probe).

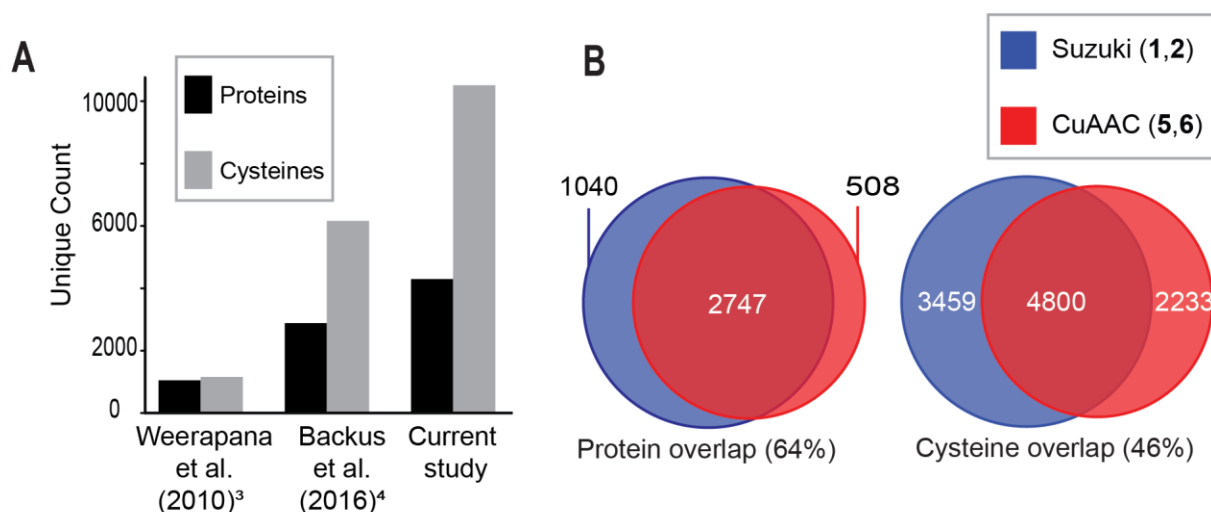

**Figure S19.** Comparison of CuAAC and Suzuki–Miyaura for chemoproteomic analysis of probe-labeled cysteines. For Suzuki–Miyaura, HEK293T lysates were labeled by cysteine-reactive probe **1** (200  $\mu$ M) for 1h followed by cross-coupling to biotin-boronic acid **2** (2 mM) in the presence of **4** (1 mM) at 50 °C for 3h. For CuAAC, lysates were labeled with alkyne-modified **5** (200  $\mu$ M), which was subjected to CuAAC labeling with azido-biotin **6** (400  $\mu$ M). (A) Total number of unique proteins and cysteines identified in prior and current (aggregate Suzuki and CuAAC datasets) study. (B) Overlap of unique proteins and biotinylated cysteine residues identified in replicate chemoproteomic experiments ( $N=3$  for each probe).

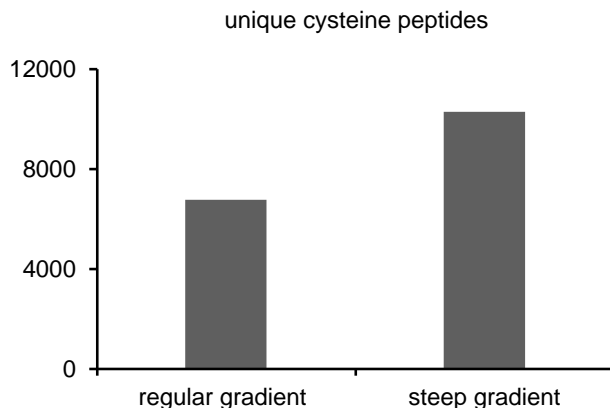

**Figure S20.** Comparison of solvent gradient during reverse phase chromatography for chemoproteomic analysis of probe-labeled cysteines. Lysates were labeled with alkyne-modified **5** (200  $\mu$ M), which was subjected to CuAAC labeling with azido-biotin **6** (400  $\mu$ M). The digested and enriched peptides were subjected to LC-MS/MS analysis using different solvent gradients.

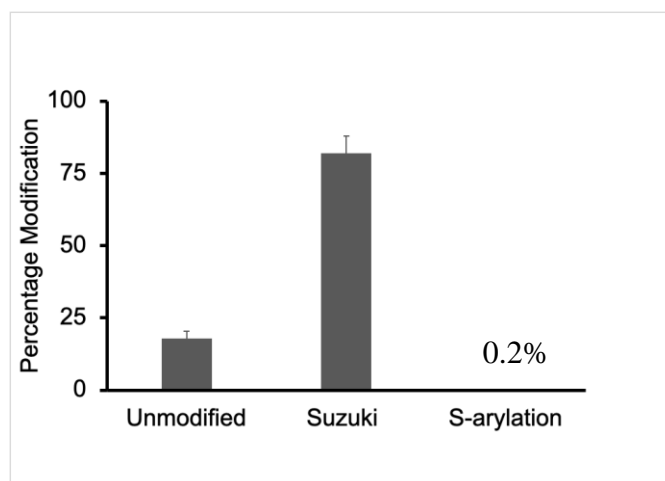

**Figure S21.** Percentage modification of Suzuki–Miyaura cross-coupling for chemoproteomic analysis. For Suzuki–Miyaura cross-coupling, HEK293T lysates were labeled by cysteine-reactive probe **1** (200  $\mu$ M) for 1h followed by cross-coupling to biotin-boronic acid **2** (2 mM) in the presence of **4** (1 mM) at 50  $^{\circ}$ C for 3h. The protein went through SP3 cleanup, reduction, alkylation, digestion, enrichment, and subjected to LC-MS/MS analysis. The result was subjected to MSFragger open search and the unmodified, Suzuki modified and s-arylation were identified and plotted as a bar graph. Error bars are  $\pm$  S.D.

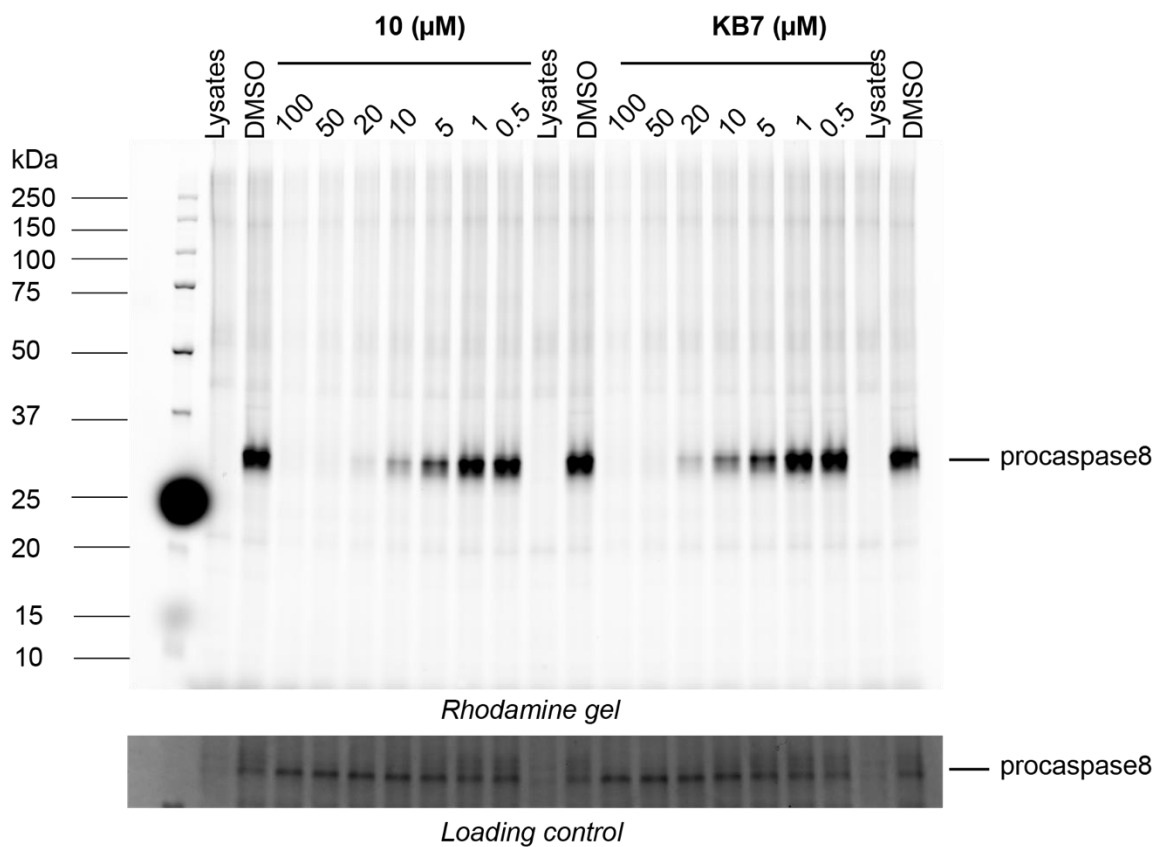

**Figure S22.** Representative full-length gel for IC<sub>50</sub> competitive labeling experiments quantified in **Figure 2B**. Recombinant procaspase-8 (D374A, D384A, C409S and C433S) was added to HEK293T soluble lysates to a final protein concentration of 500 nM. The protein-containing lysates were then treated with **10** or **KB7** or vehicle (DMSO) at the indicated concentrations for 1h, followed by labeling with **11** (10 µM) for 1h and CuAAC conjugation to rhodamine-azide.

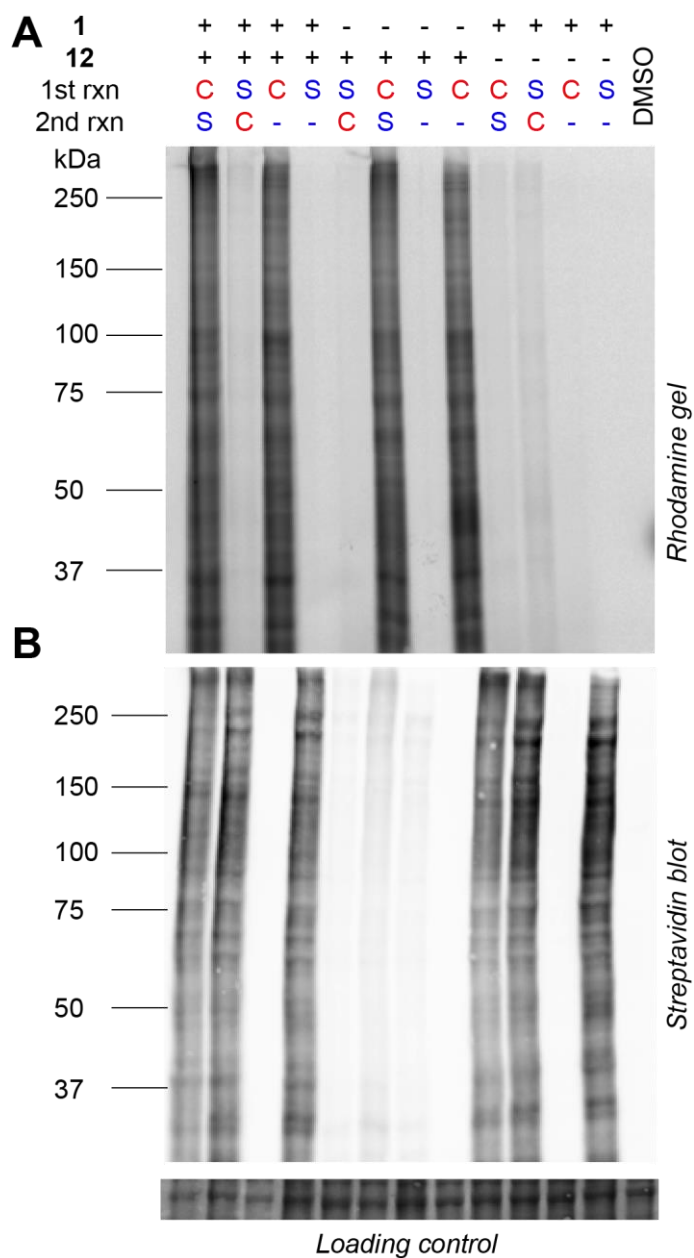

**Figure S23.** Tandem labeling of cysteines and lysines by combining Suzuki–Miyaura cross-coupling and click chemistry. HEK293T proteome was labeled with cysteine-reactive probe **1** (200  $\mu$ M) and a lysine reactive probe **12** (50  $\mu$ M), followed by one pot sequential labeling with CuAAC conjugation to **14** (AF594 alkyne, 25  $\mu$ M) and Suzuki–Miyaura cross-coupling to biotin-boronic acid **2** (2 mM) in the presence of **4** (1 mM), respectively. Order of reactions is indicated. (A) The labeling is resolved by SDS-PAGE gel and click-labeling visualized by in-gel fluorescence. (B) After transfer to nitrocellulose membrane, biotinylation was visualized by streptavidin blot. Loading control was generated using ponceau stain.

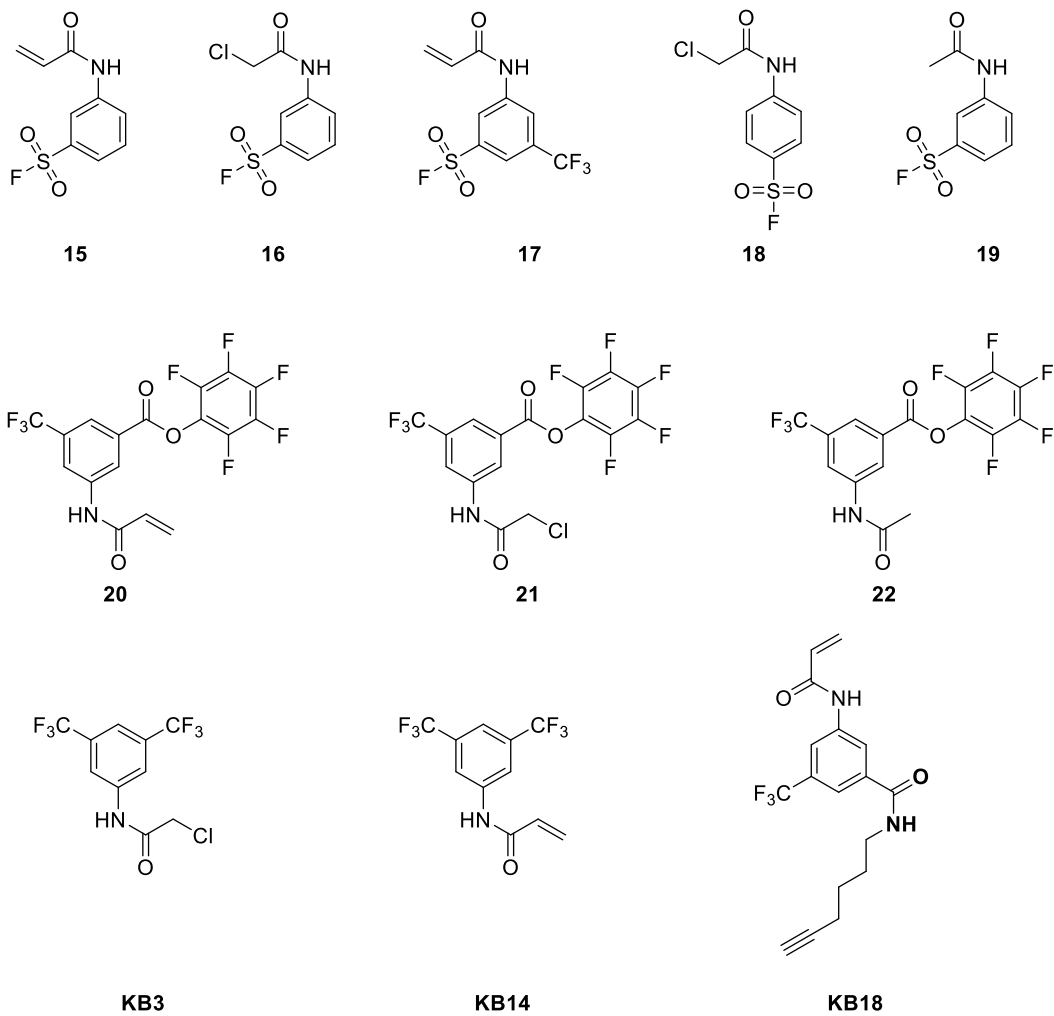

**Scheme S2.** Structures of dual cysteine- and lysine- electrophilic fragments.



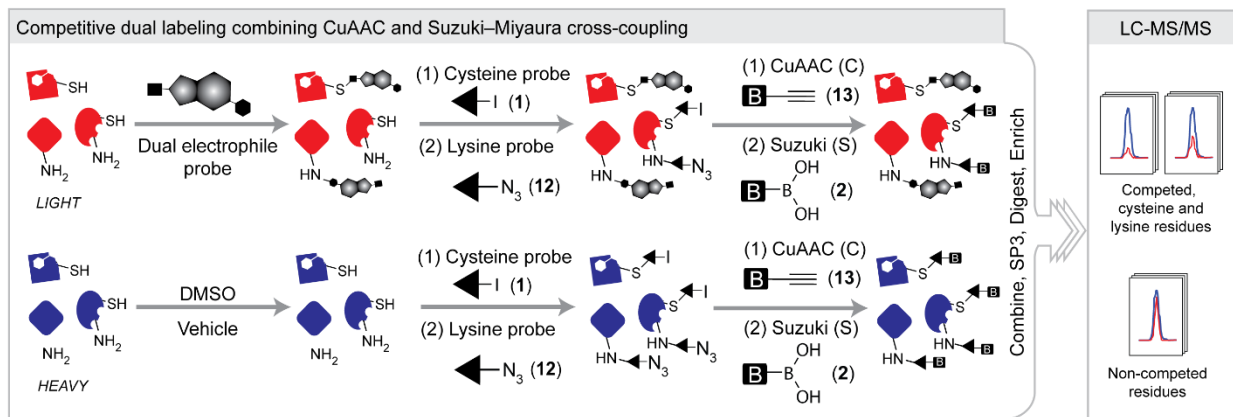

**Figure S24.** General workflow for competitive screening of bifunctional cysteine- and lysine-reactive compounds. Isotopically labeled cell lysates are treated with either compound or vehicle, followed by labeling with cysteine- and lysine reactive probes **1** and **12**. The samples are then subjected to CuAAC followed by Suzuki-Miyaura cross-coupling to biotin-azide **13** and biotin-boronic acid **2**. The samples are then combined pairwise, proteins captured on SP3 resin, followed by on-resin tryptic digest, elution and enrichment on neutravidin resin. Biotinylated peptides are then analyzed by LC-MS/MS and Dual electrophile probe-labeled peptides identified by ratio of Heavy/Light MS1 chromatographic peak areas.

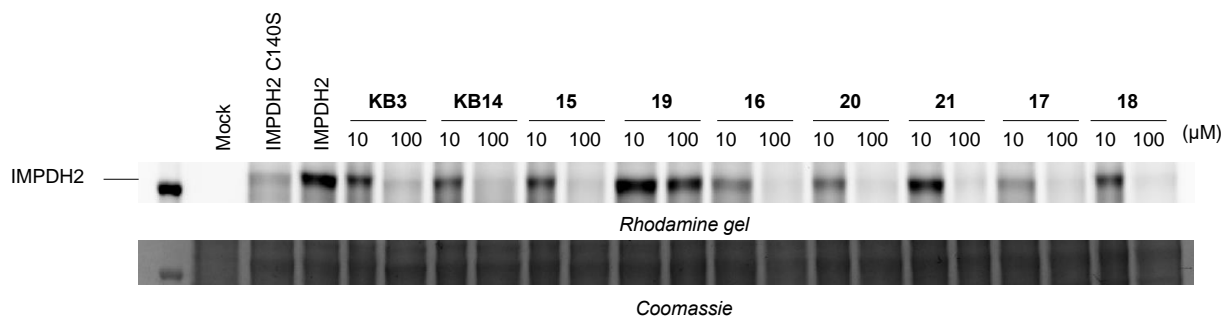

**Figure S25.** Gel-based competitive ABPP profiling of the labeling of the protein IMPDH2 by dual electrophile probes. Recombinant protein, expressed in *E. coli* was spiked into HEK 293T cell lysates followed by treatment with the indicated concentration of compounds for 1h followed by subsequent labeling with alkyne probe **KB18**, visualized by CuAAC conjugation to rhodamine azide. Loading control was generated using Coomassie instant blue.

**Table S5.** Representative search results of crosslinking sites of protein IMPDH2 with bifunctional compounds.

| Compound           | 15   |      | 16   |      | 17   |      | 19   |      | 20   |      |
|--------------------|------|------|------|------|------|------|------|------|------|------|
| Crosslinking sites | Y110 | C140 | Y110 | C140 | K109 | C140 | K134 | C140 | K134 | C140 |
|                    | K134 | C140 | K109 | C140 | Y430 | C331 | K511 | C331 | K109 | C140 |
|                    | K208 | C140 | K134 | C140 | Y110 | C140 |      |      |      |      |
|                    | Y233 | C140 | K208 | C140 | K134 | C140 |      |      |      |      |
|                    | Y459 | C331 | K228 | C140 | K208 | C140 |      |      |      |      |
|                    | Y459 | C468 | Y430 | C140 | Y233 | C140 |      |      |      |      |
|                    | K242 | C246 | K238 | C246 | K238 | C246 |      |      |      |      |
|                    | K238 | C246 | K241 | C246 | K242 | C246 |      |      |      |      |
|                    | K109 | C140 | K242 | C246 |      |      |      |      |      |      |
|                    | Y509 | C331 | Y233 | C246 |      |      |      |      |      |      |
|                    | Y430 | C140 | Y459 | C339 |      |      |      |      |      |      |
|                    |      |      | Y459 | C331 |      |      |      |      |      |      |
|                    |      |      | K109 | C173 |      |      |      |      |      |      |
|                    |      |      | K110 | C173 |      |      |      |      |      |      |

## (B) Biological Methods.

**Cell culture and preparation of cell lysates.** Cell culture reagents including Dulbecco's phosphate-buffered saline (DPBS), Dulbecco's modified Eagle's medium (DMEM)/high glucose media, Roswell Park Memorial Institute (RPMI) media, trypsin-EDTA and penicillin/streptomycin (Pen/Strep) were purchased from Fisher Scientific. Fetal Bovine Serum (FBS) were purchased from Avantor Seradigm (lot # 214B17).

All cell lines were obtained from ATCC and were maintained at a low passage number (< 20 passages). HEK293T (ATCC: CRL-3216) cells were cultured in DMEM supplemented with 10% FBS and 1% antibiotics (Penn/Strep, 100 U/mL). Jurkat A3 (ATCC: CRL-2570) cells were cultured in RPMI supplemented with 10% FBS and 1% antibiotics (Pen/Strep, 100 U/mL). Media was filtered (0.22  $\mu$ m) prior to use. Cells were maintained in a humidified incubator at 37 °C with 5% CO<sub>2</sub>. Cell lines were tested for mycoplasma using the Mycoplasma Detection Kit (InvivoGen).

For *in vitro* labeling, cells were grown to 90 – 95% confluence for HEK293T cells or until cell density reached 1.5 million cells per mL for Jurkat cells. Cells were harvested by centrifugation (4500g, 5 min, 4 °C), washed twice with cold DPBS, resuspended in 300  $\mu$ L DPBS, sonicated, and clarified by centrifuging (21,000 g, 10 min, 4 °C). The lysates were then transferred to a new microcentrifuge tube. Protein concentrations were determined using a Bio-Rad DC protein assay kit using reagents from Bio-Rad Life Science (Hercules, CA) and the lysate diluted to the working concentrations indicated below.

**Freeze pump thaw degassing of cellular lysates.** Cell lysates (5 mL of 2 mg/mL, prepared as described above) were aliquoted into a Schlenk flask with stopcock closed before attaching to a Schlenk line. The lysates were frozen by submerging the flask into a Dewar filled with liquid nitrogen. When the lysates were frozen, the stopcock on the Schlenk flask was opened and the valve on the Schlenk line was switched on to vacuum for ~ 10 min, followed by closing the stopcock and letting the lysates thaw in a warm water bath. Once the lysates thawed, the warm water bath was replaced with the liquid nitrogen bath and freeze pump thaw cycle was repeated

two additional times until no gas bubbles were observed upon solution thaw, upon which the Schlenk flask was disconnected and sealed under nitrogen before use.

**Gel-based ABPP with CuAAC.** HEK293T proteome (50  $\mu$ L of 2 mg/mL, prepared as described above) was labeled with **5** (1  $\mu$ L of 10 mM stock solution in DMSO, final concentration = 200  $\mu$ M) for 1h at ambient temperature followed by copper-mediated azide-alkyne cycloaddition (CuAAC). CuAAC was performed with **6** (2  $\mu$ L of 10 mM stock in DMSO, final concentration = 400  $\mu$ M), tris(2-carboxyethyl)phosphine hydrochloride (TCEP; 1  $\mu$ L of fresh 50 mM stock in water, final concentration = 1 mM), Tris[(1-benzyl-1H-1,2,3-triazol-4-yl)methyl]amine (TBTA, 3  $\mu$ L of 1.7 mM stock in DMSO/*t*-butanol 1:4, final concentration = 100  $\mu$ M), and CuSO<sub>4</sub> (1  $\mu$ L of 50 mM stock in water, final concentration = 1 mM). Samples were allowed to react for 1h at ambient temperature at which point the reactions were quenched with 4 $\times$  Laemmli buffer (20  $\mu$ L). Samples were then denatured (5 min, 95  $^{\circ}$ C) and analyzed by SDS-PAGE, using Criterion™ TGX Stain-Free™ gels obtained from Bio-Rad. Loading control images were obtained using the stain-free workflow on a Bio-Rad ChemiDoc™ Imager.

**Gel-based ABPP combining CuAAC and Palladium catalyzed Suzuki–Miyaura cross-coupling.** HEK293T proteome (50  $\mu$ L of 1.5 mg/mL, prepared as described above) was labeled with **1** (1  $\mu$ L of 10 mM stock solution in DMSO, final concentration = 200  $\mu$ M) for 1h at RT followed by labeling with **12** (Click Chemistry Tools, 1401-5, 1  $\mu$ L of 2.5 mM stock solution in DMSO, final concentration = 50  $\mu$ M) for an additional hour at RT. Next, the samples were subjected to CuAAC with **14** (AF594 alkyne, Click Chemistry Tools, 1297-1, 1  $\mu$ M of 1.25 mM stock in DMSO, final concentration = 25  $\mu$ M), TCEP (1  $\mu$ L of fresh 50 mM stock in water, final concentration = 1 mM), TBTA (3  $\mu$ L of 1.7 mM stock in DMSO/*t*-butanol 1:4, final concentration = 100  $\mu$ M), and CuSO<sub>4</sub> (1  $\mu$ L of 50 mM stock in water, final concentration = 1 mM) for 1h at RT. Suzuki–Miyaura cross-coupling reagents were then added after click reaction with **2** (1  $\mu$ L of 100 mM stock in DMSO, final concentration = 2 mM), and **4** (1  $\mu$ L of 50 mM stock of Pd(OAc)<sub>2</sub>/sPhos in DMA, final concentration = 1 mM). Samples were allowed to react for another 1h at 50 $^{\circ}$ C before quenching with 4 $\times$  Laemmli buffer (20  $\mu$ L). Samples were denatured (5 min, 95  $^{\circ}$ C) and then resolved by SDS-PAGE. SDS-PAGE gels were transferred to a nitrocellulose membrane using a TransBlot Turbo (Bio-Rad) following the manufacturer's instructions. Loading was assessed by Ponceau stain. The membrane was then probed as described for streptavidin blots, below. Blot was imaged on the Bio-Rad ChemiDoc™ Imager using 800 NIR channel for streptavidin-IRDye® 800CW and rhodamine channel for AF594 alkyne **14**.

**Streptavidin blot.** Gels were transferred to either polyvinylidene difluoride (PVDF, Bio-Rad, 1620177) or nitrocellulose (Bio-Rad, 1704271) membranes using a Trans-Blot Turbo transfer system (Bio-Rad) following the manufacturer's instructions. After transfer, the membranes were then blocked (2% w/v of BSA in TBS-T, 30 min) and probed with streptavidin-IRDye® 800CW (Fisher, NC0883593, 1:4000) in TBS-T. Blots were incubated overnight at 4  $^{\circ}$ C with rocking and were then washed (3  $\times$  5 min, TBS-T). The membranes were then imaged with a Bio-Rad ChemiDoc™ Imager using the 800 NIR channel.

**Proteomic sample preparation with bovine serum albumin (BSA).** BSA (200  $\mu$ L, 2 mg/mL in PBS) was labelled with **5** (8  $\mu$ L of 10 mM stock in DMSO, final concentration = 400  $\mu$ M) or **1** (8  $\mu$ L of 10 mM stock in DMSO, final concentration = 400  $\mu$ M) for 1h, followed by CuAAC including **6** (8  $\mu$ L of 10 mM stock in DMSO, final concentration = 400  $\mu$ M), TCEP (4  $\mu$ L of fresh

50 mM stock in water, final concentration = 1 mM), TBTA (12  $\mu$ L of 1.7 mM stock in DMSO/*t*-butanol 1:4, final concentration = 100  $\mu$ M), and CuSO<sub>4</sub> (4  $\mu$ L of 50 mM stock in water, final concentration = 1 mM) for 1h at RT or Suzuki–Miyaura cross-coupling with **2** (4  $\mu$ L of 100 mM stock in DMSO, final concentration = 2 mM), and **4** (4  $\mu$ L of 50 mM stock of Pd(OAc)<sub>2</sub>/sSPhos in DMA, final concentration = 1 mM) for 3h at 50 °C. The protein was then subjected to chloroform/methanol precipitation following which the pellet was resuspended with sonication in 300  $\mu$ L 8 M urea (660 mg/mL in PBS). To this was added DTT (6  $\mu$ L of 200 mM stock in water, final concentration = 4 mM) and the reaction was incubated at 65 °C for 15 min following which iodoacetamide (6  $\mu$ L of 400 mM stock in water, final concentration = 8 mM) was added and the reaction was incubated for 30 min at 37 °C with shaking. The samples were diluted with PBS (400  $\mu$ L). Trypsin (Worthington Biochemical, LS003740, 20  $\mu$ L, 1 mg/mL in 666  $\mu$ L of 50 mM acetic acid and 334  $\mu$ L of 100 mM CaCl<sub>2</sub>, final weight = 20 ng) was then added and digest was allowed to proceed overnight at 37 °C with shaking. The samples were then acidified to a final concentration of 5% (v/v) formic acid (FA). Samples were then desalted using C18 Tips (Pierce, 87782), following the manufacturer's instructions. The samples were then dried (SpeedVac) and then reconstituted in Molecular Biology Grade (MB) water containing 5% acetonitrile and 1% FA. The samples were then analyzed by LC-MS/MS, as described below.

**Proteomic sample preparation using Suzuki–Miyaura cross-coupling.** HEK293T proteome (200  $\mu$ L of 2 mg/mL, prepared as described above) was labeled with **1** (4  $\mu$ L of 10 mM stock solution in DMSO, final concentration = 200  $\mu$ M) for 1h at ambient temperature. Suzuki–Miyaura cross-coupling was performed with biotin-boronic acid **2** (4  $\mu$ L of 100 mM stock in DMSO, final concentration = 2 mM) and catalyst **4** (4  $\mu$ L of 50 mM stock in DMA, final concentration = 1 mM). 2  $\mu$ L of 10% SDS in PBS was also added into the solution (final concentration 0.1% SDS). Reactions were allowed to proceed for 3h at 50 °C. The samples were then subjected to either chloroform/methanol precipitation sample preparation or SP3 sample preparation and LC-MS/MS analysis, as described below. Experiments were conducted in triplicate.

**Proteomic sample preparation using CuAAC.** HEK293T proteome (200  $\mu$ L of 2 mg/mL, prepared as described above) was labeled with **5** (4  $\mu$ L of 10 mM stock solution in DMSO, final concentration = 200  $\mu$ M) for 1h at ambient temperature. CuAAC was performed with biotin-azide **6** (8  $\mu$ L of 100 mM stock in DMSO, final concentration = 400  $\mu$ M), TCEP (4  $\mu$ L of fresh 50 mM stock in water, final concentration = 1 mM), TBTA (12  $\mu$ L of 1.7 mM stock in DMSO/*t*-butanol 1:4, final concentration = 100  $\mu$ M), and CuSO<sub>4</sub> (4  $\mu$ L of 50 mM stock in water, final concentration = 1 mM). Samples were allowed to react for 1h at ambient temperature. The samples were then subjected to either chloroform/methanol precipitation sample preparation or SP3 sample preparation and LC-MS/MS analysis, as described below. Experiments were conducted in triplicate.

**Cellular labeling in Jurkat cells for mass spectrometry.** 20 mL Jurkat cells in complete RPMI (1 million cells/mL) were treated with **10** or **11** (40  $\mu$ L of 50 mM stock solution in DMSO, final concentration = 100  $\mu$ M) for 1 h. Control cells were treated with DMSO. Cells were then harvested by centrifugation (4,200g, 10 min, 4 °C) and washed twice in cold PBS (4,200g, 10 min, 4 °C). The cell pellets were then lysed in cold PBS (300  $\mu$ L) with sonication, clarified (21,000 rpm, 10 min) and supernatants removed to new microcentrifuge tubes. Protein concentrations were adjusted to 1.5 mg/mL and 200  $\mu$ L cell lysates were then transferred to a new microcentrifuge tube

for Suzuki–Miyaura cross-coupling or CuAAC reactions, which were performed as described above. The samples were then subjected to SP3 sample preparation and LC-MS/MS analysis, as described below. Experiments were conducted in triplicate.

**Proteomic sample preparation combining Suzuki–Miyaura cross-coupling and CuAAC.** HEK293T proteome (200  $\mu$ L of 2 mg/mL, prepared as described above) was labeled with **1** (4  $\mu$ L of 10 mM stock solution in DMSO, final concentration = 200  $\mu$ M) for 1h at RT followed by labeling with **12** (Click Chemistry Tools, 1401-5, 4  $\mu$ L of 2.5 mM stock solution in DMSO, final concentration = 50  $\mu$ M) for another hour at RT. Labeled lysates were subjected to CuAAC labeling with **6** (8  $\mu$ L of 10 mM stock in DMSO, final concentration = 400  $\mu$ M), TCEP (4  $\mu$ L of fresh 50 mM stock in water, final concentration = 1 mM), TBTA (12  $\mu$ L of 1.7 mM stock in DMSO/*t*-butanol 1:4, final concentration = 100  $\mu$ M), and CuSO<sub>4</sub> (4  $\mu$ L of 50 mM stock in water, final concentration = 1 mM) and reactions were allowed to proceed for 1h at RT. After CuAAC, **2** (4  $\mu$ L of 100 mM stock in DMSO, final concentration = 2 mM) and **4** (4  $\mu$ L of 50 mM stock of Pd(OAc)<sub>2</sub>/sPhos in DMA, final concentration = 1 mM) were added directly into the sample and Suzuki–Miyaura cross-coupling allowed to proceed for 2h at 50 °C. 30  $\mu$ L 10% SDS in PBS was then added into the reaction solutions, followed by SP3 sample preparation and LC-MS/MS analysis, as described below. Experiments were conducted in triplicate.

**Chloroform/methanol precipitation for proteomic sample preparation.** After CuAAC and/or Suzuki–Miyaura labeling, 3 mL methanol, 1 mL chloroform, and 3 mL water were added into each sample followed by centrifugation (4,200g, 10 min, 4 °C). The upper liquid was aspirated and the resulting pellet was further washed with methanol (2 x 3 mL). The pellet was solubilized in PBS containing 0.6 % SDS (0.5 mL) with sonication and heating (5 min, 95 °C) and any insoluble material was removed by an additional centrifugation step at ambient temperature (14,000 g, 1 min).

**NeutrAvidin enrichment of labeled proteins.** For each chloroform/methanol precipitated sample, 100  $\mu$ L of NeutrAvidin-agarose beads slurry (Pierce, 29200) was washed twice in 10 mL PBS and then resuspended in 2.5 mL PBS. The SDS-solubilized proteins were added to the suspension of streptavidin-agarose beads (final concentration 0.1 % SDS in PBS) and the bead mixture was rotated for 2h at ambient temperature. After incubation, the beads were pelleted by centrifugation (1,400 g, 3 min) and were washed (2  $\times$  10 mL PBS and 2  $\times$  10 mL water).

**Trypsin digest on NeutrAvidin-agarose beads.** The beads were transferred to an eppendorf tube with 1 mL water, centrifuged (21,000 g, 2 min), and resuspended in PBS containing 6 M urea (500  $\mu$ L). DTT (10  $\mu$ L of 200 mM stock in water, final concentration = 10 mM) was added into each sample and the sample was incubated at 65 °C for 15 min. To this iodoacetamide (10  $\mu$ L of 400 mM stock in water, final concentration = 20 mM) was added and the solution was incubated for 30 min at 37 °C with shaking. The bead mixture was diluted with 900  $\mu$ L PBS, pelleted by centrifugation (21,000 g, 1 min), and resuspended in PBS containing 2M Urea (75  $\mu$ L) followed by the addition of trypsin solution (Worthington Biochemical, LS003740, 10  $\mu$ L, 1 mg/mL in 666  $\mu$ L of 50 mM acetic acid and 334  $\mu$ L of 100 mM CaCl<sub>2</sub>, final weight = 10 ng). The digestion was allowed to proceed overnight at 37 °C with shaking. The beads were separated from the digest with Micro Bio-Spin columns (Bio-Rad) by centrifugation (21,000 g, 1 min), washed (2  $\times$  1 mL PBS and 3  $\times$  1 mL water) and then transferred to fresh eppendorf tubes with 1 mL water. Bound peptides

were eluted twice with 60  $\mu\text{L}$  of 80% acetonitrile in MB water containing 0.1% FA (first at RT for 10 min, second at 72  $^{\circ}\text{C}$  for 10 min). After the first 10 min incubation at RT, the sample was centrifuged (21,000 rpm, 1 min) and the top liquid layer was transferred into a Micro Bio-Spin columns (Bio-Rad) with a receiving eppendorf tube and the bottom beads were then re-dissolved in 60  $\mu\text{L}$  of 80% acetonitrile in water containing 0.1% FA. After the 10 min incubation at 72  $^{\circ}\text{C}$ , the mixture was transferred into the same Bio-Spin column. Elution was collected by centrifugation (21,000 rpm, 1 min). The combined elution was dried (SpeedVac) and resuspended in 100  $\mu\text{L}$  water containing 0.1% FA. Samples were then desalted using C18 Tips (Pierce, 87782), following the manufacturer's instructions. The samples were dried (SpeedVac) and then reconstituted in Molecular Biology Grade (MB) water containing 5% acetonitrile and 1% FA. The samples were then analyzed by LC-MS/MS, as described below.

**SP3 proteomic sample preparation.**<sup>2</sup> After CuAAC and/or Suzuki–Miyaura labeling, each sample was then treated with 0.5  $\mu\text{L}$  benzonase (Fisher Scientific, 70-664-3) for 30 min at 37  $^{\circ}\text{C}$ . DTT (10  $\mu\text{L}$  of 200 mM stock in water, final concentration = 10 mM) was added into each sample and the sample was incubated at 65  $^{\circ}\text{C}$  for 15 min. To this iodoacetamide (10  $\mu\text{L}$  of 400 mM stock in water, final concentration = 20 mM) was added and the solution was incubated for 30 min at 37  $^{\circ}\text{C}$  with shaking. SP3 sample cleanup was performed at a bead/protein ratio of 10:1 (wt/wt). For each 200  $\mu\text{L}$  sample (2 mg/mL protein concentration), 40  $\mu\text{L}$  Sera-Mag SpeedBeads Carboxyl Magnetic Beads, hydrophobic (GE Healthcare, 65152105050250, 50  $\mu\text{g}/\mu\text{L}$ , total 2 mg) and 40  $\mu\text{L}$  Sera-Mag SpeedBeads Carboxyl Magnetic Beads, hydrophilic (GE Healthcare, 45152105050250, 50  $\mu\text{g}/\mu\text{L}$ , total 2 mg) were aliquoted into a single microcentrifuge tube and gently mixed. Tubes were then placed on a magnetic rack until the beads settled to the tube wall, and the supernatants were removed. The beads were removed from the magnetic rack, reconstituted in 400  $\mu\text{L}$  of MB water, and gently mixed. Tubes were then returned to the magnetic rack, beads allowed to settle, and the supernatants removed. Washes were repeated for two more cycles, and then the beads were reconstituted in 80  $\mu\text{L}$  MB water. The bead slurries were then transferred to the Suzuki–Miyaura cross-coupling or CuAAC samples, and the samples incubated for 5 min at RT with shaking. Absolute ethanol (400  $\mu\text{L}$ ) was added to each sample, and the samples were incubated for 5 min at RT with shaking. Samples were then placed on a magnetic rack, and beads allowed to settle. Supernatants were then removed and discarded. Using the magnetic rack as described above, the beads were further washed three times with ethanol (400  $\mu\text{L}$  of 80% solution in water). Beads were then resuspended in 100  $\mu\text{L}$  PBS containing 2 M urea followed by addition trypsin solution (Worthington Biochemical, LS003740, 10  $\mu\text{L}$ , 1 mg/mL in 666  $\mu\text{L}$  of 50 mM acetic acid and 334  $\mu\text{L}$  of 100 mM  $\text{CaCl}_2$ , final weight = 10 ng). Digest was allowed to proceed overnight at 37  $^{\circ}\text{C}$  with shaking. The samples were then acidified to a final concentration of 3% (v/v) FA. After incubation for 5 min at RT with shaking, ~ 2 mL acetonitrile (> 95% of the final volume) was added to each sample and the mixtures were then incubated for an additional 10 min at RT with shaking. Supernatants were then removed and discarded using the magnetic rack, and the beads were washed ( $3 \times 500$   $\mu\text{L}$  acetonitrile). Peptides were then eluted from SP3 beads with 100  $\mu\text{L}$  of 2% DMSO in MB water for 30 min at 37  $^{\circ}\text{C}$  with shaking. The elution can be used for NeutrAvidin enrichment or can be dried (SpeedVac) before NeutrAvidin enrichment.

For proteomic sample preparation combining Suzuki–Miyaura cross-coupling and CuAAC, each sample was loaded into SP3 beads after reaction followed by protein binding with ethanol (400

μL). Beads were washed with 80% ethanol solution (3 x 400 μL) and resuspended in PBS containing 2M urea and 0.5% SDS (200 μL). DTT (10 μL of 200 mM stock in water, final concentration = 10 mM) was added into each beads slurry solution and the sample was incubated at 65 °C for 15 min. To this iodoacetamide (10 μL of 400 mM stock in water, final concentration = 20 mM) was added and the mixture was incubated for 30 min at 37 °C with shaking. Ethanol (400 μL) was then added to induce protein-bead binding following which the sample was washed with 80% ethanol solution (3 x 400 μL). The washed beads were resuspended in PBS containing 2M urea followed by addition trypsin solution (Worthington Biochemical, LS003740, 10 μL, 1 mg/mL in 666 μL of 50 mM acetic acid and 334 μL of 100 mM CaCl<sub>2</sub>, final weight = 10 ng). After tryptic digest, each sample was subjected to the remaining procedures as detailed for SP3 proteomic sample preparation.

**NeutrAvidin enrichment of labelled peptides.** For each sample, 50 μL of NeutrAvidin® Agarose resin slurry (Pierce, 29200) was washed twice in 10 mL IAP buffer (50 mM MOPS pH 7.2, 10 mM sodium phosphate, and 50 mM NaCl buffer) and then resuspended in 500 μL IAP buffer. Peptide solutions eluted from SP3 beads were then transferred to the NeutrAvidin® Agarose resin suspension, and the samples were then rotated for 2h at RT. After incubation, the beads were pelleted by centrifugation (21,000 g, 1 min) and washed by centrifugation (6 × 700 μL water). Bound peptides were eluted with 60 μL of 80% acetonitrile in MB water containing 0.1% FA (10 min at RT). The samples were then harvested by centrifugation (21,000 g, 1 min) and residual beads separated from supernatants using Micro Bio-Spin columns (Bio-Rad). The remaining peptides were then eluted from pelleted beads with 60 μL of 80% acetonitrile in water containing 0.1% FA (10 min, 72 °C). Beads were then separated from the eluants using the same Bio-Spin column. Eluants were then collected by centrifugation (21,000 g, 1 min) and the combined eluants were dried (SpeedVac). The samples were then reconstituted in 40 μL water containing 5% acetonitrile and 1% FA and analyzed by LC-MS/MS.

**Liquid-chromatography tandem mass-spectrometry (LC-MS/MS) analysis of Suzuki–Miyaura cross-coupling enriched samples.** The samples were analyzed by liquid chromatography tandem mass spectrometry using an Q Exactive™ mass spectrometer (Thermo Scientific) coupled to an Easy-nLC™ 1000 pump. Peptides were resolved on a C18 reversed phase column (3 μM, 100Å pores), packed in-house, with 100 μm internal diameter and 18 cm of packed resin. The peptides were eluted using a 140 min gradient of Buffer B in Buffer A (Buffer A: water with 3% DMSO and 0.1% FA; Buffer B: acetonitrile with 3% DMSO and 0.1% FA) and a flow rate of 220 nL/min with electrospray ionization of 2.2 kV. The regular gradient includes 0 – 5 min from 1% to 5%, 15 – 130 min from 5% to 27%, 15 – 137 min from 27% to 35%, and 137 – 138 min from 35% to 80% buffer B in buffer A. The steep gradient for this study includes 0 – 5 min from 1% to 5%, 5 – 20 min from 5% to 15%, 20 – 130 min from 15% to 35% and from 130 – 135 min from 35 to 95% buffer B in buffer A. Data was collected in data-dependent acquisition mode with dynamic exclusion (15 s), and charge exclusion (1,7,8,>8) was enabled. Data acquisition consisted of cycles of one full MS scan (400 – 1800 m/z at a resolution of 70,000) followed by 12 MS2 scans of the nth most abundant ions at resolution of 17,500.

**Peptide and protein identification.** The MS2 spectra data were extracted from a raw file using RAW Xtractor (version 1.1.0.22; available at <http://fields.scripps.edu/rawconv/>). MS2 spectra data were searched using the ProLuCID algorithm (publicly available at



[http://fields.scripps.edu/yates/wp/?page\\_id=17](http://fields.scripps.edu/yates/wp/?page_id=17) using a reverse concatenated, nonredundant variant of the Human UniProt database (release-2020\_01). Cysteine residues were searched with a static modification for carboxyamidomethylation (+57.02146) and one differential modification at cysteine residues, which is +393.1511 for Suzuki enrichment and +426.18375 for CuAAC enrichment. Peptides were required to have at least one tryptic terminus and to contain the biotin modification. ProLuCID data was filtered through DTASelect (version 2.0) to achieve a peptide false-positive rate below 1%.

**Proteomic data processing.** Custom python and R scripts were implemented to filter and compile labeled peptide datasets. Peptides with one tryptic terminus and those sequenced only once (singletons) out of three experiments were filtered out before further analysis. Unique proteins, unique residues (cysteines or lysines) and unique peptide-spectrum matches (PSMs) were quantified for each dataset, using unique identifiers. Unique proteins were established based on UniProt protein ID. Unique residues were classified by an identifier consisting of a UniProt protein ID and the residue number of the modified cysteine/lysine; residue numbers were found by aligning the peptide sequence to the corresponding UniProt protein sequence. Unique peptides were found based on sequences containing modified residue location. If a peptide was labeled at multiple residues, an identifier was generated for each protein ID and modified residue location. The overlap between datasets represented the number of common identifiers shared between both methods. The current data was compared to previously published datasets from Weerapana et al.<sup>3</sup> and Backus et al.,<sup>4</sup> which were processed to remove peptides no longer found in UniProt database (release-2020\_01), due to database updates. Identifiers from each dataset were averaged and plotted as mean  $\pm$  SD. Unpaired, two-tailed (student's or welch) t-tests were performed between replicates, where p-values < 0.05 were considered significant.

**BSA data processing.** Cysteine residues were searched with a static modification for carboxyamidomethylation (+57.02146) and one differential modification at cysteine residues, which is +393.1511 for Suzuki enrichment and +426.18375 for CuAAC enrichment. Modifications of +100.0310, +201.96794, +76.0313 were used to identify only CuAAC click-probe **5** labeled cysteines, Suzuki-probe **1** labeled cysteines, and dehalogenated Suzuki-probe **1** labeled cysteines, respectively. Peptides with one tryptic terminus and those sequenced only once (singletons) out of three experiments were filtered out before further analysis. Unique peptide-spectrum matches were totaled and averaged for each replicate. Percentages for each modification were calculated using the count of modified unique peptides divided by the combined count of unmodified and modified unique peptides.

**Proteomic data processing for in cellular labeling.** Cysteine residues were searched with a static modification for carboxyamidomethylation (+57.02146) and one differential modification at cysteine residues, +580.25082 for compound **10** modification and +613.28351 for compound **11** modification. Peptides with one tryptic terminus and those sequenced only once (singletons) out of three experiments were filtered out before further analysis. Uniprot-ID\_cysteine-position identifiers were constructed to find unique overlapping cysteines between **10** and **11** datasets. In totaling overlapping protein, each unique peptide was assigned to only one Uniprot ID for peptides mapping to multiple proteins. The longest tryptic peptide for all identified cysteines is reported from both datasets.



**Proteomic data processing for multiplexed proteomics combining Suzuki–Miyaura cross-coupling and CuAAC.** Cysteine residues were searched with a static modification for carboxyamidomethylation (+57.02146) and a differential modification (+393.1511) for Suzuki labeling. Lysine residues were searched with a differential modification (+420.19436) for CuAAC labeling. Peptides containing only one tryptic terminus were removed during processing. The proteomic data processing workflow was used to obtain unique protein, peptides, and residues for both cysteine and lysine labeling and including labeling overlap.

**Recombinant procaspase-8 expression.** Procaspase-8 (D374A, D384A, C409S and C433S) was overexpressed as an N-terminal His6-tag fusion from a pET23b vector, as described previously.<sup>5</sup> Briefly, transformed BL21(DE3) chemically competent *E. coli* (DE3, NEB) cells were grown in LB media supplemented with 100 µg/mL ampicillin at 37 °C to an OD<sub>600</sub> nm of 0.6–0.8. Flasks were then transferred to an 18 °C incubator, and protein expression was induced with 1.0 mM IPTG for 4 h. Cells were immediately harvested and resuspended in ice cold 100 mM Tris, pH 8.0 and 100 mM NaCl (Buffer A) and subjected to 2 cycles of lysis by microfluidization (Avestin EmulsiFlex-C3). The cell lysate was clarified by centrifugation (14,500g, 15 min, 4 °C), and clarified lysate was then loaded onto a 5 mL HisTrap FF crude Ni-NTA affinity column (GE Amersham) pre-equilibrated with buffer A and eluted with buffer A containing 250 mM of imidazole. Imidazole was removed from the collected eluted sample using a disposable PD-10 Desalting Column (GE) to buffer exchange to size exclusion (SEC) buffer (100 mM Tris, pH 8.0 and 100 mM NaCl and 1 mM DTT). The eluted protein was purified by FPLC (GE HiLoad 16/600 Superdex 200 pg) with size exclusion (SEC) buffer. Fractions corresponding to procaspase-8 were pooled and immediately stored at –80 °C.

**Calculation of apparent IC<sub>50</sub>s.** HEK293T proteomes (25 µL) containing procaspase-8 (D374A, D384A, C409S, C433S) at 500 nM final concentration were treated with the indicated compounds (1 µL of 25 × stock solution in DMSO) for 1h at RT, followed by 10 µM of probe **11** (1 µL of 25 × stock solution in DMSO). labeled with probe **11** for another 1 h). Subsequently, the samples were subjected to CuAAC conjugation to rhodamine-azide for 1h at ambient temperature. CuAAC was performed with rhodamine-azide (Click Chemistry Tools, AZ109-5, 0.5 µL of 1.25 mM stock in DMSO, final concentration = 25 µM), TCEP (1.5 µL of fresh 50 mM stock in water, final concentration = 1 mM), TBTA (0.5 µL of 1.7 mM stock in DMSO:t-butanol 1:4, final concentration = 100 µM), and CuSO<sub>4</sub> (0.5 µL of 50 mM stock in water, final concentration = 1 mM). Samples were then quenched with 10 µL 4× SDS-PAGE loading buffer, denatured for 5 min at 95 °C, resolved by SDS-PAGE, and visualized by in-gel fluorescence. The percentage labeling was determined by quantifying the integrated optical intensity of the bands using ImageJ software<sup>14</sup>. Nonlinear regression analysis was used to determine the apparent IC<sub>50</sub> values from a dose–response curve generated using GraphPad Prism 6. Experiments were conducted in triplicate.

**Competitive ABPP of procaspase-8 labeling using Suzuki–Miyaura cross-coupling.** 50 µL of HEK293T proteome (1 mg/mL) containing procaspase-8 (2 µM final concentration) was treated with **KB7** (1 µL of 2.5 mM stock in DMSO) or vehicle (DMSO) for 1h, followed by labeling with **10** or **11** (1 µL of 500 µM stock in DMSO) for 1h. **10**- and **11**-treated samples were conjugated to biotin-boronic acid **2** (1 mM) or biotin-azide **6** (200 µM), respectively using Suzuki–Miyaura cross-coupling for 3h at 37 °C and CuAAC for 1h at RT, as described above. Samples were heated

at 95 °C for 5 min and resolved by SDS-PAGE. Gels were imaged with Stain-Free imaging and then processed as described above for Streptavidin blots.

**IMPDH2 expression and purification.** IMPDH2 in a pET28a vector were expressed in BL21(DE3) Chemically Competent Cells (NEB), grown on LB broth supplemented with the desired antibiotic (100 g/ml ampicillin) to OD600 of 0.6–0.8 and induced with 0.5 mM IPTG for 16 h at 18 °C. Cells were immediately harvested by centrifugation (7,000 g) for 30 min and the pellet was resuspended in 30 mL cold buffer A (25 mM Tris, pH 8.0, 200 mM NaCl, 10% glycerol, 1 mM BME), supplemented with lysozyme (Sigma), DNAase (NEB) and complete protease inhibitor tablets (Roche), sonicated, and centrifuged (15,000 g, 20 min). The soluble fractions were collected and rotated for 1 h with 1 mL Ni-NTA slurry (Qiagen) at 4 °C. The slurry was then transferred to a 50 mL volume fritted column and collected by gravity flow. The resin was then washed with 100 mL buffer A containing 20 mM imidazole and eluted with 10 mL buffer A containing 200 mM imidazole. The eluant was concentrated to 2.5 mL (Amicon-Ultra-15, 10 kDa MW cutoff), buffer exchanged using PD10 columns (GE Amersham) into the storage buffer (50 mM HEPES, pH 7.4, 150 mM NaCl, 10% glycerol, 1 mM BME) and further concentrated (Amicon-Ultra-4, 10 kDa MW cutoff) to a final concentration of approximately 30  $\mu$ M protein. Protein concentration was determined using the Bio-Rad DC<sup>TM</sup> protein assay kit. Protein purity was assayed by SDS-PAGE under reducing conditions and were >95% pure.

**Crosslinking mass spectrometry sample preparation using recombinant IMPDH2.** 20  $\mu$ L purified recombinant IMPDH2 was treated with 500  $\mu$ M bifunctional crosslinking probes (1  $\mu$ L of 10 mM stock in DMSO). After 1 h incubation, reaction mixture was diluted with 8M urea (20  $\mu$ L) and 10% SDS (2  $\mu$ L). To this was added DTT (5  $\mu$ L of 200 mM stock in water) and the reaction was incubated at 65 °C for 15 min following which iodoacetamide (5  $\mu$ L of 400 mM stock in water) was added and the reaction was incubated for 30 min at 37 °C with shaking. The samples were diluted with PBS (40  $\mu$ L). Trypsin (Worthington Biochemical, LS003740, 5  $\mu$ L, 1 mg/mL in 666  $\mu$ L of 50 mM acetic acid and 334  $\mu$ L of 100 mM CaCl<sub>2</sub>, final weight = 20 ng) was then added and digest was allowed to proceed overnight at 37 °C with shaking. The samples were then acidified to a final concentration of 5% (v/v) formic acid (FA). Samples were then subjected to SP3 cleanup and LC-MS/MS analysis. Crosslinking sites were identified with SIM-XL search<sup>6</sup>.

**SILAC dual proteomics to identify bifunctional compound labeling sites.** All SILAC dual proteomic experiments were performed using isotopically labeled human HEK293T cells generated by 8 passages in either light (100  $\mu$ g/ml each of L-arginine and L-lysine) or heavy (100  $\mu$ g/mL each of [<sup>13</sup>C<sub>6</sub><sup>15</sup>N<sub>4</sub>] L-arginine and [<sup>13</sup>C<sub>6</sub><sup>15</sup>N<sub>2</sub>]L-lysine) SILAC DMEM media (Thermo Scientific) supplemented with 10% dialyzed fetal calf serum, penicillin, streptomycin and glutamine. 100  $\mu$ L of light and heavy cellular lysates (2 mg/mL) were treated with crosslinking compounds (2  $\mu$ L of 25 mM stock solution in DMSO, final concentration = 500  $\mu$ M) or DMSO, respectively, for 1 h. Next the lysates were labeled with **1** (4  $\mu$ L of 10 mM stock solution in DMSO, final concentration = 200  $\mu$ M) for 1h at RT followed by labeling with **12** (Click Chemistry Tools, 1401-5, 4  $\mu$ L of 2.5 mM stock solution in DMSO, final concentration = 50  $\mu$ M) for another hour at RT. Labeled lysates were subjected to CuAAC labeling with **6** (8  $\mu$ L of 10 mM stock in DMSO, final concentration = 400  $\mu$ M), TCEP (4  $\mu$ L of fresh 50 mM stock in water, final concentration = 1 mM), TBTA (12  $\mu$ L of 1.7 mM stock in DMSO/*t*-butanol 1:4, final concentration = 100  $\mu$ M), and CuSO<sub>4</sub> (4  $\mu$ L of 50 mM stock in water, final concentration = 1 mM) and reactions were allowed

to proceed for 1h at RT. After CuAAC, **2** (4  $\mu$ L of 100 mM stock in DMSO, final concentration = 2 mM) and **4** (4  $\mu$ L of 50 mM stock of Pd(OAc)<sub>2</sub>/sSPhos in DMA, final concentration = 1 mM) were added directly into the sample and Suzuki–Miyaura cross-coupling allowed to proceed for 2h at 50 °C. 30  $\mu$ L 10% SDS in PBS was then added into the reaction solutions. 100  $\mu$ L light proteome and 100  $\mu$ L heavy proteome were then combined followed by SP3 sample preparation and LC-MS/MS analysis, as described below. Experiments were conducted in duplicate.

### (C) General Synthetic Methods.

**General Methods.** All reactions were performed in oven dried glassware under inert atmosphere unless stated otherwise. Silica gel P60 (SiliCycle) was used for column chromatography and SiliCycle 60 F254 silica gel (precoated sheets, 0.25 mm thick) was used for analytical thin layer chromatography. Plates were visualized by fluorescence quenching under UV light or by staining with iodine. Other reagents were purchased from Sigma-Aldrich (St. Louis, MO), Alfa Aesar (Ward Hill, MA), EMD Millipore (Billerica, MA), Fisher Scientific (Hampton, NH), Oakwood Chemical (West Columbia, SC), Combi-blocks (San Diego, CA), Click Chemistry Tools (Scottsdale, AZ) and Cayman Chemical (Ann Arbor, MI) and used without further purification. <sup>1</sup>H NMR and <sup>13</sup>C NMR spectra for characterization of new compounds and monitoring reactions were collected in CDCl<sub>3</sub>, CD<sub>3</sub>OD, CD<sub>6</sub>CO or DMSO-d<sub>6</sub> (Cambridge Isotope Laboratories, Cambridge, MA) on a Bruker AV 400 or 500 MHz spectrometer in the Department of Chemistry & Biochemistry at University of California, Los Angeles. All chemical shifts are reported in the standard notation of parts per million using the peak of residual proton signals of the deuterated solvent as an internal reference. Coupling constant units are in Hertz (Hz). Splitting patterns are indicated as follows: br, broad; s, singlet; d, doublet; t, triplet; q, quartet; m, multiplet; dd, doublet of doublets; dt, doublet of triplets. High-resolution mass spectroscopy was performed on a Shimadzu IT-TOF (ESI source) at University of California, Irvine.

### (D) Catalyst Preparation and Reaction Screening

The following compounds were purchased from the indicated vendors. sSPhos (Sigma-Aldrich, 677280-2G), Pd(OAc)<sub>2</sub> (Oakwood Chemical, 50231507), DavePhos (Sigma-Aldrich, 638021-1G), 2-amino-4,6-dihydropyrimidine (VWR, AAA1181314), 2-(dimethylamino)pyrimidine-4,6-diol (Matrix Scientific, MFCD01935970), tri-*tert*-butylphosphonium tetrafluoroborate (Combi-Blocks, OR-6368), 4-iodoaniline (Combi-Blocks, AN-3814), 4-chloroaniline (Combi-Blocks, QA9461), 4-bromoaniline (Combi-Blocks, OS-7881), 4-methoxyphenylboronic acid (Combi-Blocks, BB-2155). All precatalysts and the rest of ligands were purchased from Sigma-Aldrich.

**4:** Pd(OAc)<sub>2</sub> (11.2 mg, 0.05 mmol, 1.0 equiv.) and [1,1'-Biphenyl]-3-sulfonic acid, 2'-(dicyclohexylphosphino)-2,6-dimethoxy-sodium salt (sSPhos, 25.6 mg, 0.05 mmol, 1.0 equiv.) were mixed in 1 mL degassed dimethylacetamide (DMA). The mixture was heated to 50 °C for 30 min until the solution become dark brown. The mixture was then used directly as a 50 mM catalyst solution for Suzuki–Miyaura cross-coupling.

Pd(OAc)<sub>2</sub>/DavePhos: Pd(OAc)<sub>2</sub> (11.2 mg, 0.05 mmol, 1.0 equiv.) and 2-dicyclohexylphosphino-2'-(*N,N*-dimethylamino)biphenyl (DavePhos, 19.7 mg, 0.05 mmol, 1.0 equiv.) were mixed in 1 mL degassed dimethylacetamide (DMA), and the mixture was heated to 50 °C for 30 min until the

solution become dark brown. The mixture can be directly used as a 50 mM catalyst solution for Suzuki–Miyaura cross-coupling.

**ADHP and DMADHP:** The preparation for ADHP and DMADHP were adopted from previous literature.<sup>7</sup> For ADHP, 2-amino-4,6-dihydroxypyrimidine (13 mg, 0.1 mmol, 1.0 equiv.) was dissolved in NaOH (0.1 M, 2 mL) at 65 °C. Pd(OAc)<sub>2</sub> (11.2 mg, 0.05 mmol, 0.5 equiv.) was added and allowed to stir at 65 °C for 30 min. The solution was allowed to cool to ambient temperature and diluted with 5.0 mL of distilled water to give a final catalyst concentration of 0.01 M. For DMADHP, 2-(dimethylamino)pyrimidine-4,6-diol (15.5 mg, 0.1 mmol, 1 equiv.) was dissolved in NaOH (0.1 M, 2 mL) at 65 °C. Pd(OAc)<sub>2</sub> (11.2 mg, 0.05 mmol, 0.5 equiv.) was added and allowed to stir at 65 °C for 30 min. The resulting orange solution was allowed to cool to ambient temperature and diluted with 5.0 mL of distilled water to give a final catalyst concentration of 0.01 M.

**Precatalyst preparation:** Precatalyst were either used directly from stocks (50 mM) or premixed with 10 equiv. K<sub>2</sub>CO<sub>3</sub> for 10 min at 70 °C before adding to reaction samples as indicated above in figure legends.

**Reaction screening.** Serial dilutions were performed on 4'-methoxy-[1,1'-biphenyl]-4-amine to achieve concentrations of 0.05 mM, 0.1 mM, 0.2 mM, 0.5 mM, 0.8 mM, 1.0 mM, and 1.5 mM. Areas under the peaks were taken from the 254 nm wavelength of the LC-MS trace to generate the calibration curve.

The reaction screening was conducted by making separate stock solutions of PBS, 1 mM glutathione (GSH) in PBS, 1 mg/mL bovine serum albumin (BSA) in PBS, and 1 mg/mL HEK293T cell lysate in PBS. sPhos, DavePhos, tri-*tert*-butylphosphonium tetrafluoroborate ((P(*t*-Bu)<sub>3</sub>), 2-amino-4,6-dihydroxypyrimidine (ADHP) and 2-(dimethylamino)pyrimidine-4,6-diol (DMADHP) were used as ligands to generate palladium catalysts. To each stock solution was added 1 mM of 4-iodoaniline (5.0 μL of 100 mM stock solution in DMSO) and 2 mM of 4-methoxyphenylboronic acid (10.0 μL of 100 mM stock solution in DMSO). Catalysts were then added to give a final concentration of 0.5 mM and a final solution volume of 500 μL. All twenty reactions were allowed to react at 37 °C for 1 h. The reaction mixtures were then extracted with 1.0 mL ethyl acetate. 500 μL of the solution was then added to 500 μL of MeOH for LC-MS. The extent of each of the reactions was determined by taking the area under the curve of the 254 nm wavelength UV trace. Concentrations were calculated by referencing the standard.

### (E) Synthesis of Probes.

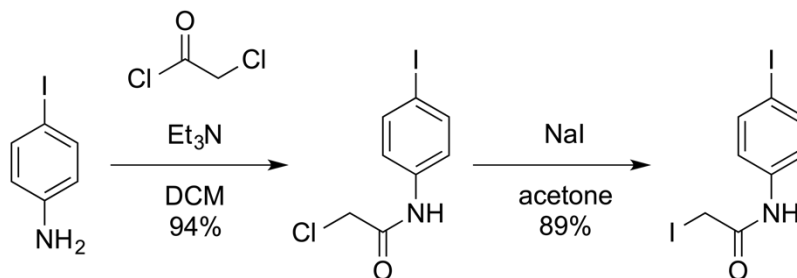

***N*-(4-iodophenyl)-2-iodoacetamide (1)**. The procedure was adopted from previous literature with modifications.<sup>8</sup> 4-Iodoaniline (150.0 mg, 0.68 mmol, 1.0 equiv.) was dissolved in 3 mL THF, followed by the addition of TEA (95  $\mu$ L, 0.68 mmol, 1.0 equiv.). Chloroacetyl chloride (109  $\mu$ L, 1.37 mmol, 2 equiv.) was then added dropwise into the reaction mixture at 0 °C. The reaction was then stirred for 2h at RT. The reaction was quenched with 20 mL saturated NH<sub>4</sub>Cl (aq), extracted with EtOAc (2  $\times$  30 mL), and evaporated under reduced pressure to afford 2-chloro-*N*-(4-iodophenyl)acetamide as a pale yellow oil (189.0 mg, 94%), which was used without further purification. 2-chloro-*N*-(4-iodophenyl)acetamide (150 mg, 0.51 mmol, 1 equiv.) and NaI (120 mg, 0.80 mmol, 1.57 equiv.) were dissolved in 10 mL acetone. After stirring for 3h at 65 °C, the mixture was concentrated under reduced pressure. Purification by silica column chromatography (20% – 33% EtOAc/hexanes) yielded the title compound as a white solid (175.6 mg, 84% overall over two steps). <sup>1</sup>H NMR (500 MHz, CD<sub>3</sub>OD)  $\delta$  7.65 (d, 2 H, J = 8.9 Hz), 7.36 (d, 2H, J = 8.9 Hz), 3.83 (s, 2H); <sup>13</sup>C NMR (125 MHz, CD<sub>3</sub>OD)  $\delta$  168.1, 138.3, 137.6, 121.4, 86.8, -2.6; HRMS-ESI (m/z) calculated for C<sub>8</sub>H<sub>6</sub>I<sub>2</sub>NO [M-H]<sup>-</sup>: 385.8539; found 385.8550.

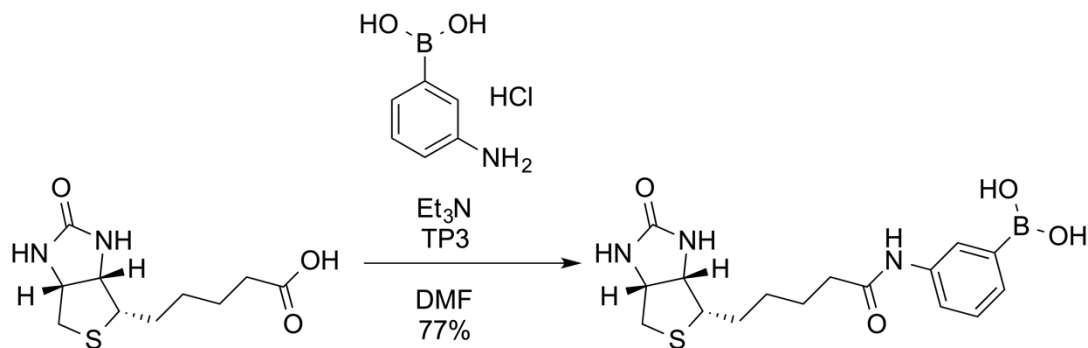

**(3-(5-((4*S*)-2-oxohexahydro-1*H*-thieno[3,4-*d*]imidazol-4-yl)pentanamido)phenyl)boronic acid<sup>9</sup> (2)**. D-Biotin (324.4 mg, 1.33 mmol, 1.0 equiv.) and 3-aminophenylboronic acid (200.0 mg, 1.46 mmol, 1.1 equiv.) were dissolved in 10 mL THF, followed by the addition of TEA (0.556 mL) and propylphosphonic anhydride (TP3, 1.58 mL, 0.6 mL, 50 % w/w soln. in acetonitrile). The reaction was stirred for 22h at RT. The reaction mixture was concentrated and purified by silica column chromatography (5 : 1 : 0.1 MeOH : DCM : H<sub>2</sub>O) to afford product (371.9 mg, 77%) as a colorless solid. <sup>1</sup>H NMR (500 MHz, CD<sub>3</sub>OD):  $\delta$  7.78 (s, 1H), 7.61 (dd, J = 8.6 Hz, 1.6, 1H), 7.28 (m, 2H), 4.46 (m, 1H), 4.27 (m, 1H), 3.18 (m, 1H), 2.89 (dd, J = 12.8 Hz, 4.9 Hz, 1H), 2.67 (d, J = 12.7 Hz, 1H), 2.38 (t, J = 7.3 Hz, 2H), 1.73 (m, 3H), 1.61 (m, 1H), 1.48 (m, 2H); <sup>13</sup>C NMR (125 MHz, CD<sub>3</sub>OD):  $\delta$  176.4, 173.1, 164.7, 137.7, 128.9, 127.7, 124.9, 121.3, 61.9, 60.2, 55.6, 39.7, 36.3, 28.4, 28.1, 25.4. HRMS-ESI (m/z) calculated for C<sub>16</sub>H<sub>22</sub>BN<sub>3</sub>O<sub>4</sub>NaS [M+Na]<sup>+</sup>: 386.1325; found: 386.1304.

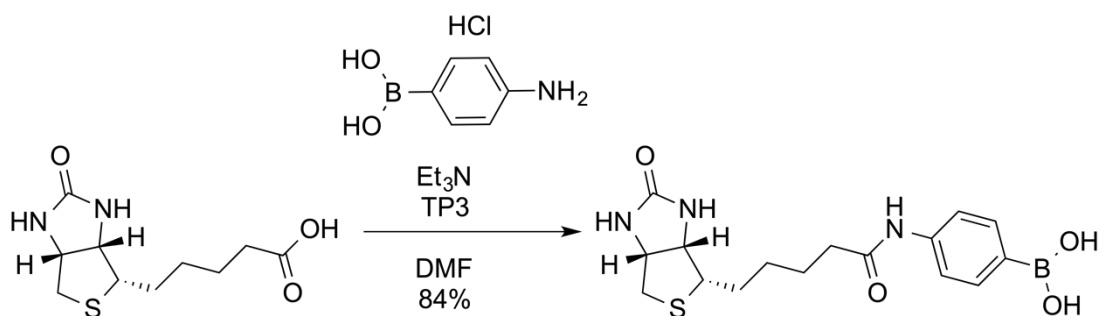

**(4-(5-((4*S*)-2-oxohexahydro-1*H*-thieno[3,4-*d*]imidazol-4-yl)pentanamido)phenyl)boronic acid (3).** D-Biotin (150.0 mg, 0.61 mmol, 1.0 equiv.) and 4-aminophenylboronic acid hydrochloride (127.4 mg, 0.73 mmol, 1.2 equiv.) were dissolved in 3 mL DMF, followed by the addition of TEA (0.85 mL) and propylphosphonic anhydride (TP3, 0.6 mL, 50+% w/w soln. in acetonitrile). The reaction was stirred for 18h at RT. The reaction mixture was concentrated and purified by silica column chromatography (5% – 20% MeOH/DCM) to afford title compound (187.0 mg, 84%) as a colorless solid.  $^1\text{H}$  NMR (500 MHz,  $\text{CD}_3\text{OD}$ ):  $\delta$  7.60 (m, 4H), 4.50 (m, 1H), 4.32 (m, 1H), 3.23 (m, 1H), 2.95 (dd,  $J = 12.8$  Hz, 4.9 Hz, 1H), 2.72 (d,  $J = 12.7$  Hz, 1H), 2.42 (t,  $J = 7.3$  Hz, 2H), 1.77 (m, 3H), 1.65 (m, 1H), 1.49 (m, 2H);  $^{13}\text{C}$  NMR (125 MHz,  $\text{CD}_3\text{OD}$ ):  $\delta$  173.2, 164.7, 134.11, 122.0, 118.7, 114.8, 61.9, 60.2, 55.6, 39.7, 36.3, 28.4, 28.1, 25.4, 7.9. HRMS-ESI ( $m/z$ ) calculated for  $\text{C}_{16}\text{H}_{22}\text{BN}_3\text{O}_4\text{NaS}$  [ $\text{M}+\text{Na}$ ] $^+$ : 386.1325; found: 386.1318.

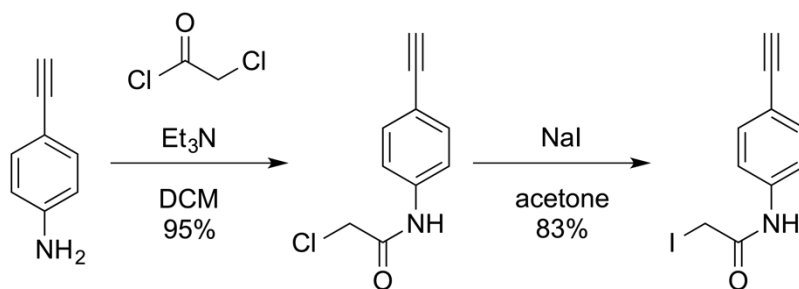

***N*-(4-ethynylphenyl)-2-iodoacetamide (5).** 4-Ethynylaniline (300.0 mg, 2.56 mmol, 1.0 equiv.) was dissolved in 3 mL THF, followed by the addition of TEA (714  $\mu\text{L}$ , 5.12 mmol, 2.0 equiv.). Then, chloroacetyl chloride (509  $\mu\text{L}$ , 6.40 mmol, 2.5 equiv.) was added dropwise into the reaction mixture at 0 °C. The reaction was stirred for another 2h at RT. The reaction was quenched with 20 mL saturated  $\text{NH}_4\text{Cl}$  (aq), extracted with 2 x 30 mL EtOAc, and evaporated under reduced pressure to afford a pale yellow oil, 2-chloro-*N*-(4-iodophenyl)acetamide with no further purification (470.0 mg, 95%). 2-chloro-*N*-(4-iodophenyl)acetamide (150 mg, 0.78 mmol, 1 equiv.) and NaI (234.0 mg, 1.56 mmol, 2 equiv.) were dissolved in 10 mL acetone. After 3 h stirring at 70 °C, the mixture was concentrated. Purification by silica column chromatography (1:6 – 1:5 EtOAc/hexanes) yielded *N*-(4-ethynylphenyl)-2-iodoacetamide (184.5 mg, 79% overall yield in two steps) as a white solid.  $^1\text{H}$  NMR (500 MHz,  $(\text{CD}_3)_2\text{CO}$ ):  $\delta$  7.69 (s, 1H), 7.48 (m, 4H), 3.85 (s, 2H), 3.06 (s, 1H);  $^{13}\text{C}$  NMR (125 MHz,  $(\text{CD}_3)_2\text{CO}$ ):  $\delta$  165.2, 138.0, 133.6, 119.7, 118.8, 83.5, -0.5. HRMS-ESI ( $m/z$ ) calculated for  $\text{C}_{10}\text{H}_8\text{INNaO}$  [ $\text{M}+\text{Na}$ ] $^+$ : 307.9548; found: 307.9540.

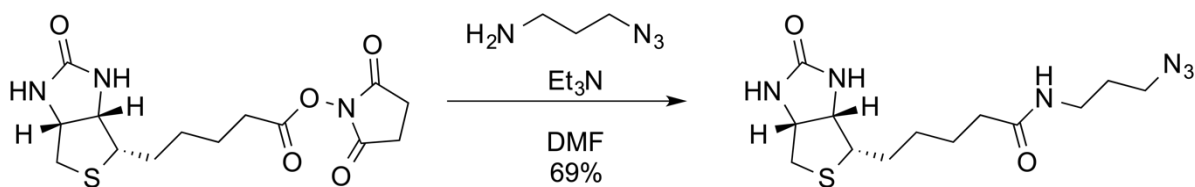

***N*-(3-azidopropyl)-5-((4*S*)-2-oxohexahydro-1*H*-thieno[3,4-*d*]imidazol-4-yl)pentanamide**

**(6).**<sup>10</sup> (+)-Biotin N-hydroxysuccinimide ester were prepared according to previous reported procedure<sup>11</sup> with 73% yield. (+)-Biotin N-hydroxysuccinimide ester (500 mg, 1.47 mmol, 1.0 equiv.) was suspended in 5 mL of DMF. 3-azidopropan-1-amine (147 mL, 1.54 mmol, 1.05 equiv.) was added, followed by TEA (306 mL, 2.20 mmol, 1.5 equiv.). The reaction was left to stir at room temperature until all solids were fully dissolved, indicating reaction completion. Product was recrystallized as a white solid in excess ether, filtered off, and dried in *vacuo* to afford product as a white powder (330 mg, 69%). <sup>1</sup>H NMR (500 MHz, DMSO-*d*<sub>6</sub>): δ 7.83 (s, 1H), 6.42 (s, 1H), 6.35 (s, 1H), 4.34 – 4.26 (m, 1H), 4.16 – 4.09 (m, 1H), 3.34 (d, *J* = 6.9 Hz, 3H), 3.08 (q, *J* = 6.4 Hz, 3H), 2.82 (dd, *J* = 12.4, 5.1 Hz, 1H), 2.59 (s, 1H), 2.05 (t, *J* = 7.4 Hz, 2H), 1.68 – 1.21 (m, 9H); <sup>13</sup>C NMR (126 MHz, DMSO-*d*<sub>6</sub>): δ 172.0, 162.7, 61.0, 59.2, 55.42, 48.4, 39.5, 35.7, 35.2, 28.5, 28.2, 28.0, 25.3; HRMS-ESI (*m/z*) calculated for C<sub>13</sub>H<sub>22</sub>N<sub>6</sub>O<sub>2</sub>NaS [M+Na]<sup>+</sup>: 349.1423; found: 349.1429.

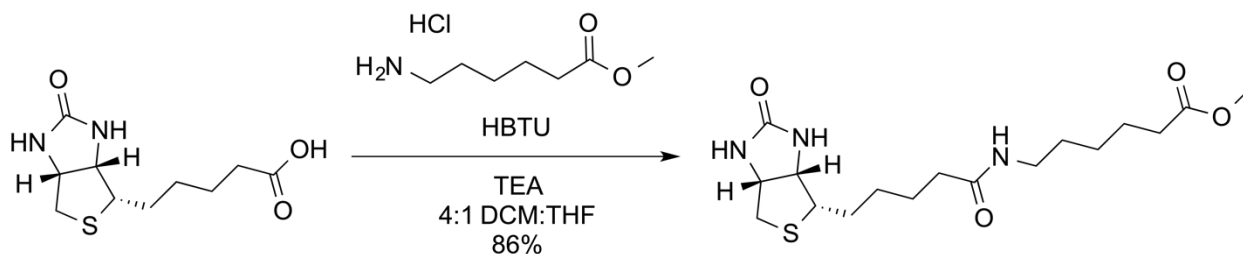

**Methyl 6-(5-((4*S*)-2-oxohexahydro-1*H*-thieno[3,4-*d*]imidazol-4-yl)pentanamido)hexanoate**<sup>12</sup>

**(15).** D-biotin (300.0 mg, 1.23 mmol, 1.0 equiv.) and methyl 6-aminohexanoate hydrochloride (267.7 mg, 1.47 mmol, 1.2 equiv.) were dissolved in 5 mL 4:1 DCM/THF, followed by the addition of TEA (1.5 mL, 11.07 mmol, 9.0 equiv.) and HBTU (700mg, 1.85 mmol, 1.5 equiv.). The reaction mixture was stirred for 18h at RT. The reaction mixture was concentrated and purified by silica column chromatography (5% – 8% MeOH/DCM) to afford the title compound (305.9 mg, 67%) as a white solid. <sup>1</sup>H NMR (500 MHz, CD<sub>3</sub>OD): δ 4.48 (m, 1 H), 4.30 (m, 1 H), 3.19 (m, 3H), 2.92 (dd, *J* = 12.8 Hz, 4.9 Hz, 1H), 2.70 (d, *J* = 12.7 Hz, 1H), 2.33 (t, *J* = 7.4 Hz, 2H), 2.19 (t, *J* = 7.4 Hz, 2H), 1.61 (m, 3H), 1.46 (m, 3H), 1.31 (m, 7H); <sup>13</sup>C NMR (125 MHz, CD<sub>3</sub>OD): δ 174.6, 174.4, 164.7, 61.97, 60.2, 55.6, 50.6, 46.5, 39.7, 38.9, 35.4, 33.3, 28.7, 28.4, 28.1, 7.9; HRMS-ESI (*m/z*) calculated for C<sub>17</sub>H<sub>29</sub>N<sub>3</sub>O<sub>4</sub>NaS [M+Na]<sup>+</sup>: 394.1776; found: 394.1763.

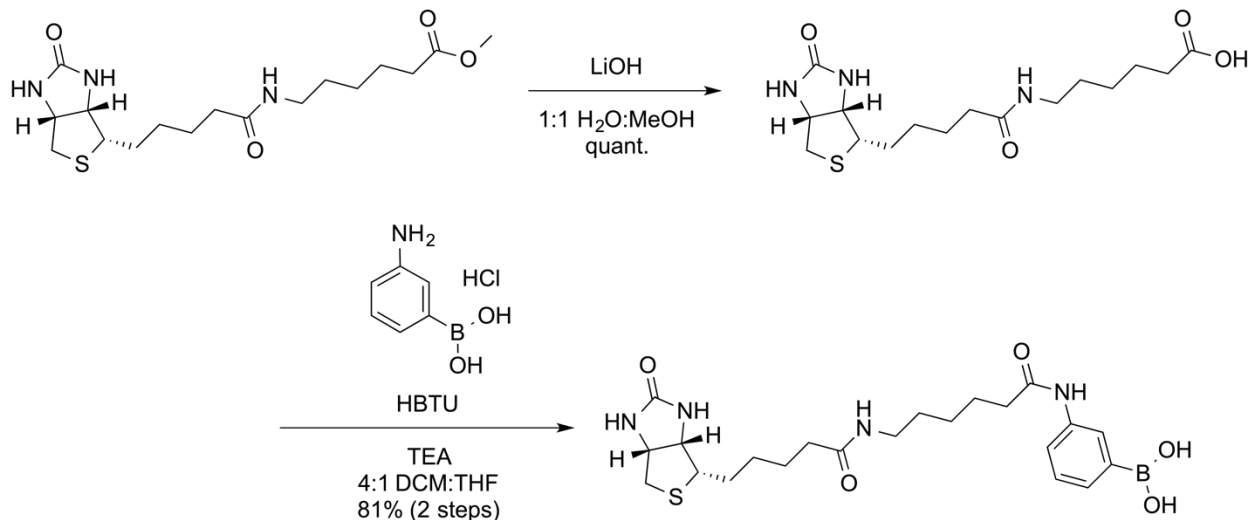

**(4-(6-(5-((4*S*)-2-oxohexahydro-1*H*-thieno[3,4-*d*]imidazol-4-yl)pentanamido)hexanamido)phenyl)boronic acid (7).** To a solution of methyl 6-(5-((4*S*)-2-oxohexahydro-1*H*-thieno[3,4-*d*]imidazol-4-yl)pentanamido)hexanoate (200 mg, 0.54 mmol, 1 equiv.) in 2 mL 1:1 MeOH/H<sub>2</sub>O, lithium hydroxide monohydrate (68.0 mg, 1.62 mmol, 3 equiv.) was added. The reaction was stirred for 4h at RT. The formation of the hydrolyzed product was monitored by TLC and LC-MS. The resulting solution was neutralized with 1M HCl and concentrated. Without further purification, the hydrolyzed product (115 mg, 0.32 mmol, 1 equiv.) was re-dissolved in 3 mL DMF, followed by the addition of HBTU (146.4 mg, 0.39 mmol, 1.2 equiv.), 3-aminophenylboronic acid hydrochloride (78 mg, 0.45 mmol, 1.4 equiv.) and TEA (136.0  $\mu$ L, 1.62 mmol, 3 equiv.). This solution was stirred for 3h and concentrated. Purification by silica gel chromatography (6:1:0.1 DCM/MeOH/H<sub>2</sub>O) to afford the title compound as a white solid (123.0 mg, 81%). <sup>1</sup>H NMR (500 MHz, CD<sub>3</sub>OD):  $\delta$  7.7 (Br, 1H), 7.58 (d, *J* = 7.95 Hz, 1H), 7.34 (Br, 1H), 7.26 (t, *J* = 7.65 Hz, 1H), 4.45 (m, 1 H), 4.26 (m, 1 H), 3.17 (m, 3H), 2.89 (dd, *J* = 12.8 Hz, 4.9 Hz, 1H), 2.67 (d, *J* = 12.7 Hz, 1H), 2.37 (t, *J* = 7.4 Hz, 2H), 2.17 (t, *J* = 7.4 Hz, 2H), 1.62 (m, 8H), 1.40 (m, 4H); <sup>13</sup>C NMR (125 MHz, CD<sub>3</sub>OD):  $\delta$  = 174.6, 173.1, 164.7, 137.6, 129.1, 127.5, 125.0, 115.0, 62.0, 60.2, 55.6, 39.6, 38.8, 36.4, 35.4, 28.8, 28.4, 28.1, 26.2, 25.5, 25.2; HRMS-ESI (*m/z*) calculated for C<sub>22</sub>H<sub>33</sub>BN<sub>4</sub>O<sub>5</sub>NaS [M+Na]<sup>+</sup>: 499.2167; found: 499.2202.

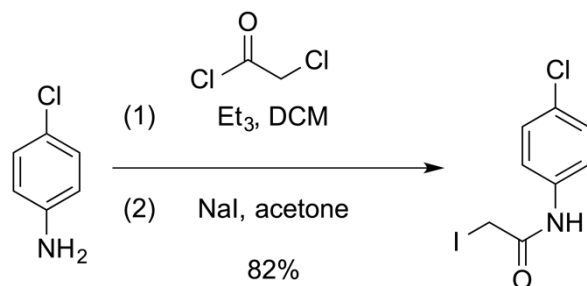

***N*-(4-chlorophenyl)-2-iodoacetamide<sup>8</sup> (8).** The same procedure was followed as for the synthesis of *N*-(4-iodophenyl)-2-iodoacetamide (1) to afford the title compound (208 mg, 82% overall yield in two steps). <sup>1</sup>H NMR (500 MHz, (CD<sub>3</sub>)<sub>2</sub>CO):  $\delta$  10 (s, 1H), 8.98 (m, 4H), 2.86 (s, 2H); <sup>13</sup>C NMR (125 MHz, (CD<sub>3</sub>)<sub>2</sub>CO):  $\delta$  167.3, 154.4, 150.0, 149.9, 133.6, 1.9; HRMS-ESI (*m/z*) calculated for C<sub>8</sub>H<sub>6</sub>ClINO [M-H]<sup>-</sup>: 293.9183; found: 293.9181.



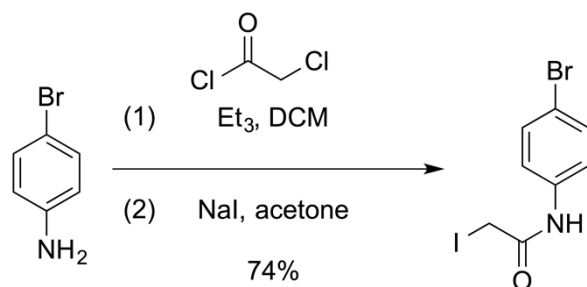

***N*-(4-bromophenyl)-2-iodoacetamide (9).** The same procedure was followed as for the synthesis of *N*-(4-iodophenyl)-2-iodoacetamide (1) to afford the title compound (128 mg, 74% overall yield in two steps). <sup>1</sup>H NMR (500 MHz, CDCl<sub>3</sub>): δ 7.62 (s, 1H), 7.44 (m, 4H), 3.85 (s, 2H); HRMS-ESI (m/z) calculated for C<sub>8</sub>H<sub>6</sub>BrINO [M-H]<sup>-</sup>: 337.8677; found: 337.8674.

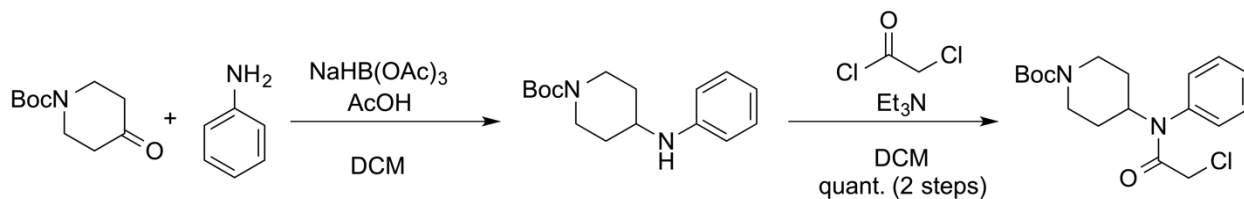

***tert*-butyl 4-(2-chloro-*N*-phenylacetamido)piperidine-1-carboxylate (16).**<sup>4</sup> The title compound was prepared according to Backus *et al.*, Nature. 2016, 534, 570-574.<sup>4</sup> in two steps with quantitative yield. <sup>1</sup>H NMR (500 MHz, CDCl<sub>3</sub>) δ 7.46 – 7.35 (m, 3H), 7.20 – 7.01 (m, 2H), 4.77 – 4.61 (m, 1H), 4.05 (s, 2H), 3.69 (s, 2H), 2.74 (s, 2H), 1.85 – 1.67 (m, 2H), 1.35 (s, 9H), 1.27 – 1.12 (m, 2H); HRMS-ESI (m/z) calculated for C<sub>8</sub>H<sub>7</sub>BrINNaO [M+Na]<sup>+</sup>: 375.1451; found: 375.1446.

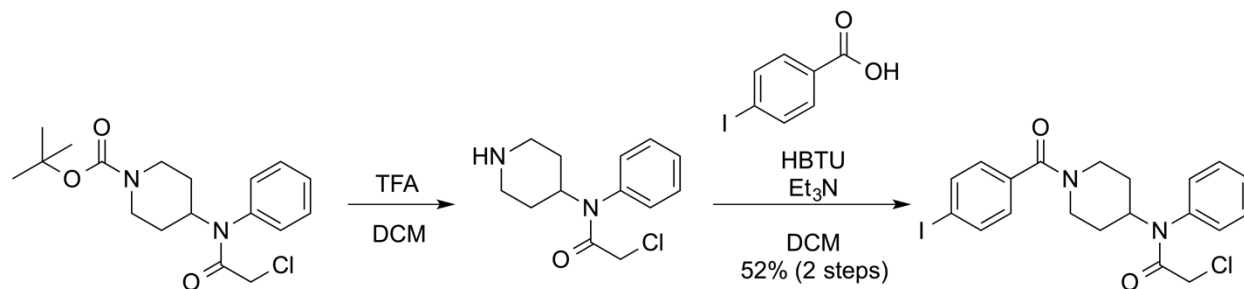

**2-chloro-*N*-(1-(4-iodobenzoyl)piperidin-4-yl)-*N*-phenylacetamide (10).** To a solution of *tert*-butyl 4-(2-chloro-*N*-phenylacetamido)piperidine-1-carboxylate (240 mg, 0.68 mmol, 1 equiv) in 5 mL DCM was added trifluoroacetic acid (2 mL). The reaction was allowed to react for 2h at RT. The formation of product was monitored by LC-MS and TLC (1:1 Hexane/EtOAc) showing starting material is gone and forming a new baseline spot. After complete consumption of starting material was observed the resulting solution was concentrated under a stream of nitrogen until no further evaporation was observed, affording the deprotected amine as its trifluoroacetate salt. This viscous gum was then treated with triethylamine in ethyl acetate (30% v/v, 5 mL; solution smokes upon addition) and concentrated. Without further purification, the deprotected amine was dissolved in 18 mL DCM, followed by addition of TEA (800 μL), 4-iodobenzoyl chloride (248 mg, 1.0 mmol, 1.5 equiv.) and HBTU (760 mg, 2.00 mmol, 3.0 equiv.). This solution was stirred overnight, quenched with saturated aqueous sodium bicarbonate, and extracted with Et<sub>2</sub>O (3 × 10

mL). The resulting solution was dried over magnesium sulfate, filtered, and concentrated. The resulting oil was purified by silica gel chromatography (20 – 50% EtOAc/hexanes) to afford the product as a pale yellow solid (170 mg, 52%). <sup>1</sup>H NMR (500 MHz, (CD<sub>3</sub>)<sub>2</sub>CO): δ 7.69 (d, J = 8.25 Hz, 2H), 7.46 (m, 3H), 7.12 (Br, 1H), 7.02 (d, J = 8.25 Hz, 2H), 4.82 (tt, J = 12.15 Hz, 3.85 Hz, 2H), 3.69 (s, 2H), 2.20 (m, 2H), 1.86 (br, 2H), 1.37 (m, 1H), 1.24 (m, 1H); <sup>13</sup>C NMR (125 MHz, (CD<sub>3</sub>)<sub>2</sub>CO): δ 169.3, 166.0, 165.7, 137.6, 136.9, 135.0, 130.0, 129.6, 128.6, 95.9, 60.4, 53.2, 42.4, 38.6. HRMS-ESI (m/z) calculated for C<sub>20</sub>H<sub>20</sub>ClIN<sub>2</sub>NaO<sub>2</sub> [M+Na]<sup>+</sup>: 505.0156; found: 505.0161.

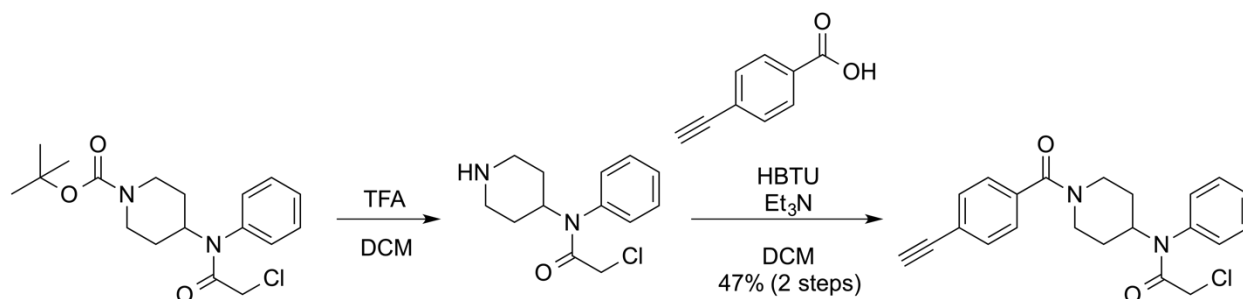

**2-chloro-N-(1-(4-ethynylbenzoyl)piperidin-4-yl)-N-phenylacetamide (11).** Deprotected amine in DCM (6 mL) was obtained according to the same procedure detailed above with tert-butyl 4-(2-chloro-N-phenylacetamido)piperidine-1-carboxylate (230 mg, 0.68 mmol, 1 equiv.) followed by the addition of TEA (661 μL), HBTU (455 mg, 1.2 mmol, 1.8 equiv.) and 4-ethynyl benzoic acid (146 mg, 0.95 mmol, 1.4 equiv.). This solution was stirred overnight, quenched with saturated aqueous sodium bicarbonate, and extracted with Et<sub>2</sub>O (3 × 10 mL). The resulting solution was dried over magnesium sulfate, filtered, and concentrated. The resulting oil was purified by silica gel chromatography (20 – 50% EtOAc/hexanes) to afford the title compound as a yellow oil (122 mg, 47%). <sup>1</sup>H NMR (500 MHz, (CD<sub>3</sub>)<sub>2</sub>CO): δ 7.46 (m, 5H), 7.24 (d, J = 8.46, 2H), 7.12 (Br, 1H), 4.82 (tt, J = 12.15 Hz, 3.85 Hz, 2H), 3.69 (s, 2H), 3.09 (s, 1H), 2.09 (m, 2H), 1.86 (br, 2H), 1.32 (Br, 1H), 1.24 (m, 2H); <sup>13</sup>C NMR (125 MHz, (CD<sub>3</sub>)<sub>2</sub>CO): δ 169.4, 166.0, 165.6, 137.0, 135.8, 132.2, 130.0, 129.6, 126.9, 123.7, 82.7, 78.7, 60.4, 53.3, 42.4, 38.6; HRMS-ESI (m/z) calculated for C<sub>22</sub>H<sub>21</sub>ClIN<sub>2</sub>NaO<sub>2</sub> [M+Na]<sup>+</sup>: 403.1189; found: 403.1169.

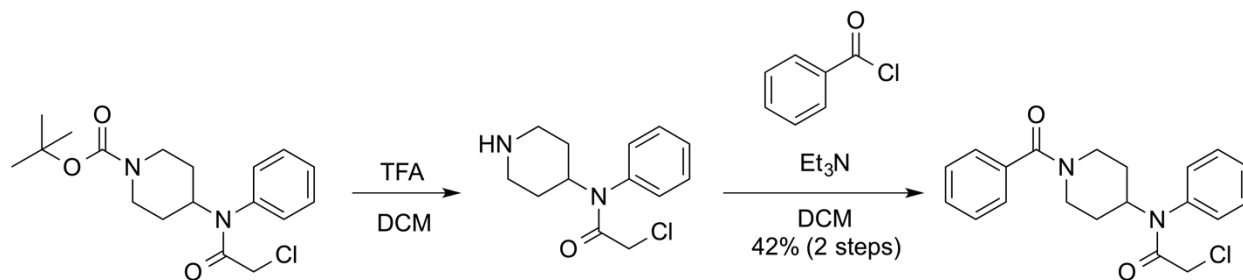

**N-(1-benzoylpiperidin-4-yl)-2-chloro-N-phenylacetamide (KB7).** KB7 was obtained following the literature procedure<sup>4</sup> to afford KB7 (85 mg, 42%).

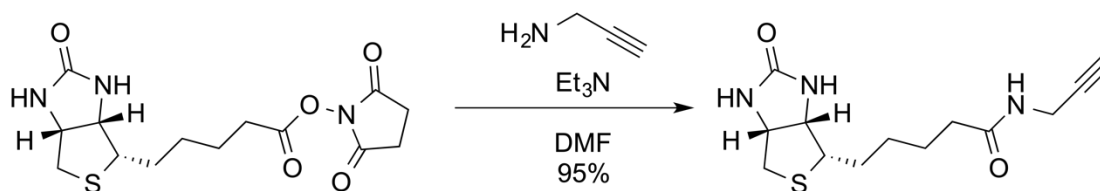

**5-((4S)-2-oxohexahydro-1H-thieno[3,4-d]imidazol-4-yl)-N-(prop-2-yn-1-yl)pentanamide<sup>11</sup> (13).** (+)-Biotin N-hydroxysuccinimide ester<sup>11</sup> (500 mg, 1.47 mmol, 1.0 equiv.) was dissolved in 5 mL of DMF in a 25 mL round bottom flask. TEA (306 mL, 2.20 mmol, 1.5 equiv.) and propargylamine (103 mL, 1.61 mmol, 1.1 equiv.) were added and the reaction was left to stir for 6h, at which point the white suspension turned into a faint yellow gel. Excess diethyl ether was added to the gel to precipitate out the product as white crystals. The white crystals were filtered off and collected in a scintillation vial. 1 mL of 1:1 H<sub>2</sub>O/acetonitrile was added to the crystals and the suspension was frozen at -80 °C. The crystals were dried via lyophilization, yielding a white powder (393 mg, 95% yield). <sup>1</sup>H NMR (500 MHz, DMSO-*d*<sub>6</sub>): δ 6.42 (d, *J* = 5.8 Hz, 1H), 6.35 (s, 1H), 4.34 – 4.24 (m, 1H), 4.12 (s, 1H), 3.83 (d, *J* = 5.4 Hz, 1H), 3.08 (s, 2H), 2.82 (dd, *J* = 12.4, 5.0 Hz, 1H), 2.59 (s, 1H), 2.19 (t, *J* = 7.4 Hz, 1H), 2.08 (t, *J* = 7.4 Hz, 1H), 1.68 – 1.19 (m, 6H); <sup>13</sup>C NMR (126 MHz, DMSO-*d*<sub>6</sub>): δ 171.8, 162.7, 81.4, 72.8, 61.1, 59.2, 55.4, 39.5, 34.9, 33.6, 28.2, 28.1, 28.1, 28.0, 27.7, 25.2, 25.1, 24.6; HRMS-ESI (*m/z*) calculated for C<sub>13</sub>H<sub>19</sub>N<sub>3</sub>O<sub>2</sub>NaS [M+Na]<sup>+</sup>: 304.1096; found: 304.1106

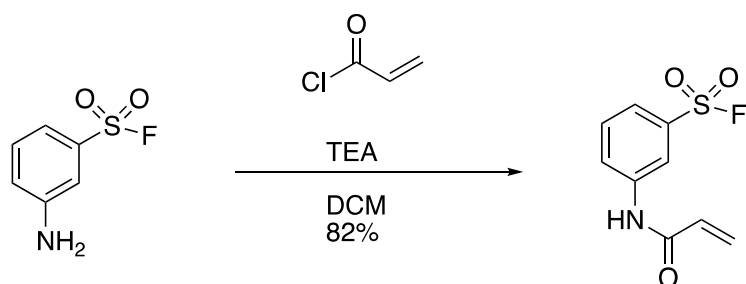

**3-acrylamidobenzenesulfonyl fluoride (15).** To a solution of 3-aminobenzenesulfonyl fluoride hydrochloride (100 mg, 0.47 mmol, 1 equiv.) in 2 mL DCM was added TEA (198 μL), acryloyl chloride (77 μL) in an ice bath. Next the reaction was allowed to react for 3h at RT. The reaction was quenched with 30 mL saturated NaHCO<sub>3</sub> (aq), extracted with DCM (2 × 20 mL), and was concentrated and purified by silica column chromatography (2:1 hexanes/ EtOAc) to afford product (88.9 mg, 82%) as a colorless solid. <sup>1</sup>H NMR (500 MHz, CDCl<sub>3</sub>): δ 8.45 (s, 1H), 8.27 (s, 1H), 8.04 (d, *J* = 8.1 Hz, 1H), 7.71 (d, *J* = 8.1 Hz, 1H), 7.55 (t, *J* = 8.1 Hz, 1H), 6.46 (dd, *J* = 16.9, 1.05 Hz, 1H), 6.32 (dd, *J* = 16.9, 10.2 Hz, 1H), 5.83 (dd, *J* = 10.2, 1.05 Hz, 1H); <sup>13</sup>C NMR (125 MHz, CDCl<sub>3</sub>): δ 169.1, 139.4, 133.6, 133.4, 130.5, 126.4, 123.6, 118.9, 25.5; <sup>19</sup>F-NMR (376 MHz, CDCl<sub>3</sub>) δ 65.7. HRMS-ESI (*m/z*) calculated for C<sub>9</sub>H<sub>7</sub>FNO<sub>3</sub>S [M-H]<sup>-</sup>: 228.0131; found: 228.0133.

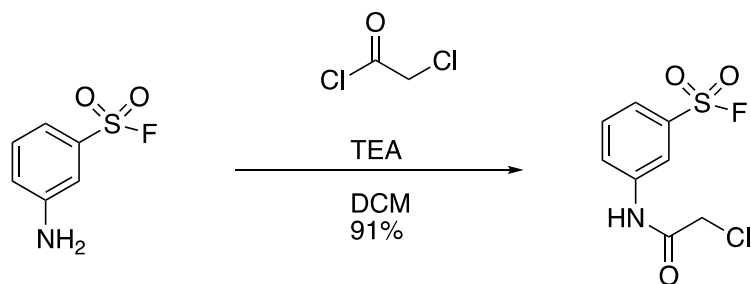

**3-(2-chloroacetamido)benzenesulfonyl fluoride (16).** To a solution of 3-aminobenzenesulfonyl fluoride hydrochloride (100 mg, 0.47 mmol, 1 equiv.) in 2 mL DCM was added TEA (198  $\mu$ L), 2-chloroacetyl chloride (75  $\mu$ L) in an ice bath. Next the reaction was allowed to react for 3h at RT. The reaction was quenched with 30 mL saturated  $\text{NaHCO}_3$  (aq), extracted with DCM ( $2 \times 20$  mL), and was concentrated and purified by silica column chromatography (2:1 hexanes/ EtOAc) to afford product (108.1 mg, 91%) as a colorless solid.  $^1\text{H}$  NMR (500 MHz,  $\text{CDCl}_3$ ):  $\delta$  8.44 (s, 1H), 8.23 (t,  $J = 2.0$  Hz 1H), 8.02 (d,  $J = 8.3$  Hz 1H), 7.81 (d,  $J = 8.0$  Hz 1H), 7.63 (t,  $J = 8.0$  Hz, 1H), 4.24 (s, 2H);  $^{13}\text{C}$  NMR (125 MHz,  $\text{CDCl}_3$ ):  $\delta$  164.2, 138.1, 134.1, 133.9, 130.6, 126.5, 124.6, 119.4, 42.7;  $^{19}\text{F}$ -NMR (376 MHz,  $\text{CDCl}_3$ )  $\delta$  65.7. HRMS-ESI (m/z) calculated for  $\text{C}_8\text{H}_6\text{ClFNO}_3\text{S}$  [M-H] $^-$ : 249.9741; found: 249.9757.

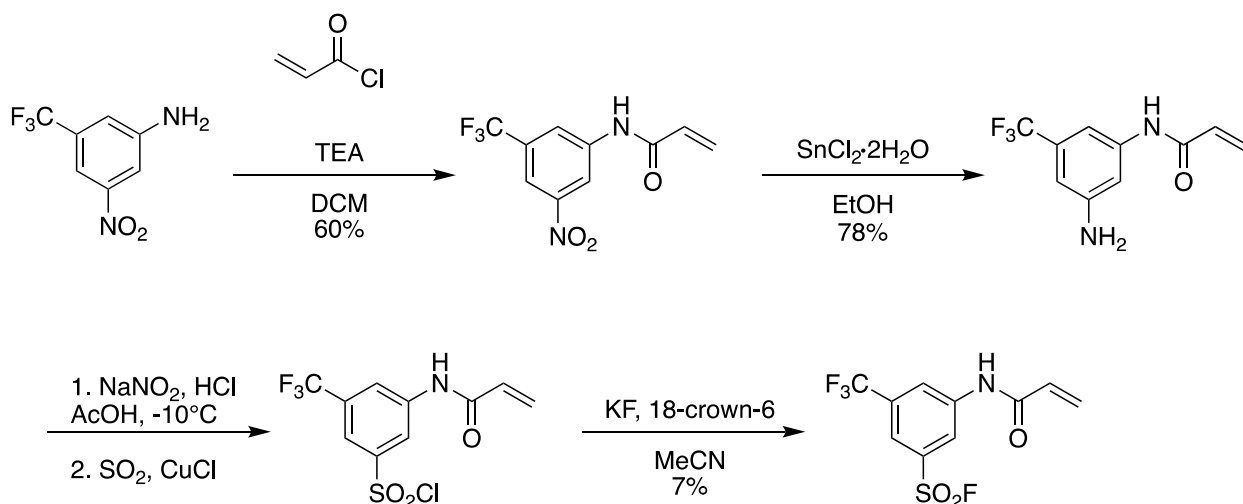

***N*-(3-nitro-5-(trifluoromethyl)phenyl)acrylamide.** To an oven-dried 25 mL round-bottom flask equipped with stir bar was added 3-nitro-5-(trifluoromethyl)aniline (0.5 g, 2.42 mmol). The flask was then capped with rubber septa and purged with nitrogen. To this was added methylene chloride (10 mL) followed by triethylamine (0.67 mL, 4.85 mmol). The solution was cooled to  $0^\circ\text{C}$  and acryloyl chloride (0.44 mL, 4.85 mmol) was added dropwise over a 5 minute period. Upon complete addition the ice bath was removed and the reaction was allowed to stir at ambient temperature. Once complete conversion was achieved as determined by TLC the reaction mixture was diluted with saturated sodium bicarbonate solution, extracted with DCM (3x) and the combined organic layers washed with brine and dried over  $\text{Na}_2\text{SO}_4$ . After flash column chromatography (EtOAc:Hex 1:99 to 1:3) the desired compound was obtained as a yellow solid (0.42 g, 60%).  $^1\text{H}$ -NMR (400 MHz,  $\text{CDCl}_3$ )  $\delta$  8.66 (t, 1H), 8.34 (t, 1H), 8.23 (t, 1H), 6.55 (dd, 1H), 6.29 (dd, 1H), 5.92 (dd, 1H).  $^{13}\text{C}$ -NMR (100 MHz,  $\text{CDCl}_3$ )  $\delta$  163.8, 148.7, 139.8, 133.1, 132.8, 130.2, 129.8, 121.8, 117.3, 115.9.

**N-(3-amino-5-(trifluoromethyl)phenyl)acrylamide.** To an oven-dried 15mL pressure tube equipped with stir bar was added *N*-(3-nitro-5-(trifluoromethyl)phenyl)acrylamide (100mg, 0.38 mmol) and tin (II) chloride dihydrate (269 mg, 1.19 mmol). The tube was purged with nitrogen gas and ethanol (2.74 mL) was added, the tube capped, and allowed to stir at reflux. After 1h the solution was allowed to cool to ambient temperature, diluted with saturated sodium bicarbonate solution, and extracted with ethyl acetate (3x). The combined organic layers washed with brine and dried over Na<sub>2</sub>SO<sub>4</sub>. After flash column chromatography (EtOAc:Hex 1:3 to 1:1) the desired compound was obtained as a yellow oil (69mg, 78%). <sup>1</sup>H-NMR (400MHz, CDCl<sub>3</sub>) δ 7.85 (s, 1H), 7.37 (s, 1H), 6.97 (s, 1H), 6.62 (s, 1H), 6.41 (dd, 1H), 6.26 (dd, 1H), 5.76 (dd, 1H), 3.66 (br, 2H). <sup>13</sup>C-NMR (100MHz, CDCl<sub>3</sub>) δ 163.8, 148.7, 139.8, 133.1, 132.8, 130.2, 129.8, 121.8, 117.3, 115.9

**3-acrylamido-5-(trifluoromethyl)benzenesulfonyl fluoride (17).** To **N-(3-amino-5-(trifluoromethyl)phenyl)acrylamide** (69 mg, 0.3 mmol) in a 3 mL microwave vial was added a mixture of concentrated hydrochloric acid (0.13 mL) and glacial acetic acid (0.13 mL) with vigorous stirring. Once the white hydrochloride salt precipitated, the beaker was transferred to a salt-ice bath and gradual decrease in the temperature of the reaction mixture was monitored carefully. When the temperature of the reaction mixture had reached -10°C, a solution of sodium nitrite (23 mg, 0.33 mmol) in 0.4 mL of water was added in such a rate that the temperature of the reaction mixture did not exceed 5°C. After complete addition of the sodium nitrite solution, the mixture was stirred for additional 45 mins at -10°C. Separately at the same time, in a 3 mL microwave vial equipped with magnetic stirrer, was added glacial acetic acid (0.3 mL). Sulfur dioxide was bubbled through the glacial acetic acid. Cuprous chloride was added to this solution. The sulfur dioxide was bubbled until the color of the suspension changed from yellow-green to blue-green. The whole process took approximately 30 min for completion. The reaction mixture was then placed in an ice bath and the temperature was monitored carefully, when the S9 temperature reached 10°C, the diazotization reaction mixture was added in portions over 30-min duration to the sulfur dioxide solution gradually and carefully. The excess foaming of the reaction mixture was prevented by addition of a drop of diethyl ether. After the complete addition of the diazotization mixture to the round bottom flask, the contents of the round bottom flask was poured into ice water (1:1, 20 mL), and stirred magnetically until the melting of the ice. The crude product was extracted with 20-mL portions of ether until the ether washings was colorless. The combined organic layer was neutralized with saturated aqueous sodium bicarbonate until neutral and washed once with brine followed by drying with sodium sulfate. The resulting sulfonyl chloride was used without further purification. To a 3mL microwave vial was added sulfonyl chloride (55 mg), KF (14 mg, 0.23 mmol), and 18-crown-6 (4 mg, 0.009 mmol). The vial was capped with a rubber septa, purged with nitrogen, and acetonitrile was subsequently added. After 18h the reaction mixture was diluted with water and extracted with Et<sub>2</sub>O (3x). The combined organic layers were washed once with brine and dried over Na<sub>2</sub>SO<sub>4</sub>. The desired sulfonyl fluoride was afforded after flash column chromatography (EtOAc:Hex 1:9 to 1:3) as a white solid (6 mg, 7% over 2 steps). <sup>1</sup>H-NMR (500MHz, CDCl<sub>3</sub>) δ 8.45 (t, 1H), 8.39 (t, 1H), 7.98 (t, 1H), 6.54 (dd, 1H), 6.28 (dd, 1H), 5.93 (dd, 1H); <sup>13</sup>C-NMR (125MHz, CDCl<sub>3</sub>) δ 163.8, 140.1, 134.9, 134.7, 133.3, 130.4, 129.7, 122.8, 121.8, 120.3; <sup>19</sup>F-NMR (376 MHz, CDCl<sub>3</sub>) δ -63.1 (3H) , 65.9 (1H). HRMS-ESI (m/z) calculated for C<sub>10</sub>H<sub>6</sub>F<sub>4</sub>NO<sub>3</sub>S [M-H]<sup>-</sup>: 296.0005; found: 296.0018.

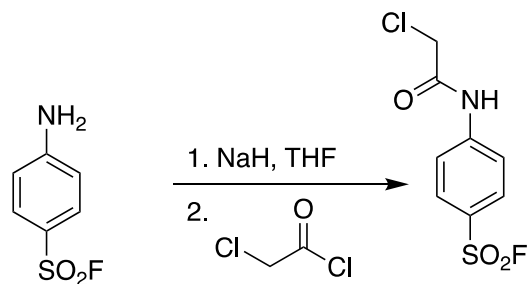

**4-(2-chloroacetamido)benzenesulfonyl fluoride (18).** To an oven-dried 3mL microwave vial equipped with stir bar was added sodium hydride (60% in mineral oil) (14mg, 0.34mmol). The flask was then capped with rubber septa and purged with nitrogen. To this was added 4-aminobenzenesulfonyl fluoride (50 mg, 0.28 mmol) in THF (1.12mL) and allowed to stir for 30 minutes. The solution was then cooled to 0°C Then chloroacetyl chloride (34uL, 0.43mmol) was added dropwise over a five minute period. Upon complete the reaction was allowed to warm to ambient temperature and stir until complete conversion was achieved as determined by TLC. The reaction mixture was then quenched with saturated sodium bicarbonate solution, extracted with DCM (3x) and the combined organic layers washed with brine and dried over Na<sub>2</sub>SO<sub>4</sub> to furnish the desired product as an off-white solid (54mg, 77%). <sup>1</sup>H-NMR (500MHz, CDCl<sub>3</sub>) δ 8.57 (br, 1H), 7.99 (d, 2H), 7.85 (d, 2H), 4.23 (s, 2H); <sup>13</sup>C-NMR (125MHz, CDCl<sub>3</sub>) δ 164.50, 143.30, 130.28, 128.69 (d), 120.03, 42.97; <sup>19</sup>F-NMR (XXX MHz, CDCl<sub>3</sub>) δ 66.7 (1H); HRMS (ESI-MS) [M-H]<sup>-</sup> Calculated = 249.9741; Found = 249.9741

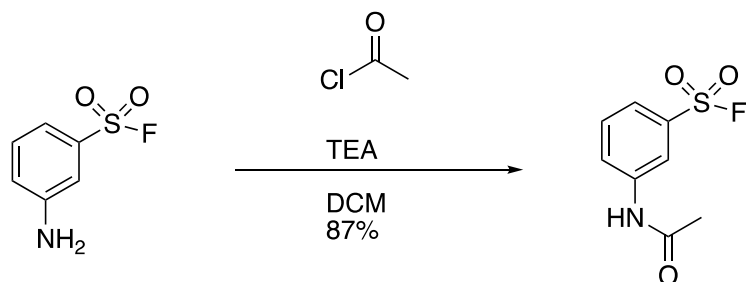

**3-acetamidobenzenesulfonyl fluoride (19).** To a solution of 3-aminobenzenesulfonyl fluoride hydrochloride (100 mg, 0.47 mmol, 1 equiv.) in 2 mL DCM was added TEA (198 μL), acetyl chloride (67.3 μL) in an ice bath. Next the reaction was allowed to react for 3h at RT. The reaction was quenched with 30 mL saturated NaHCO<sub>3</sub> (aq), extracted with DCM (2 × 20 mL), and was concentrated and purified by silica column chromatography (2:1 hexanes/ EtOAc) to afford product (89.3 mg, 87%) as a colorless solid. <sup>1</sup>H NMR (500 MHz, CDCl<sub>3</sub>): δ 8.16 (s, 1H), 8.00 (m, 1H), 7.70 (t, J = 8.1 Hz, 1H), 2.2 (s, 3H); <sup>13</sup>C NMR (125 MHz, CDCl<sub>3</sub>): δ 164.4, 139.3, 133.6, 133.4, 130.5, 130.3, 129.5, 126.8, 123.8, 119.4; <sup>19</sup>F-NMR (376 MHz, CDCl<sub>3</sub>) δ 65.8. HRMS-ESI (m/z) calculated for C<sub>8</sub>H<sub>7</sub>FNO<sub>3</sub>S [M-H]<sup>-</sup>: 216.0131; found: 216.0149.

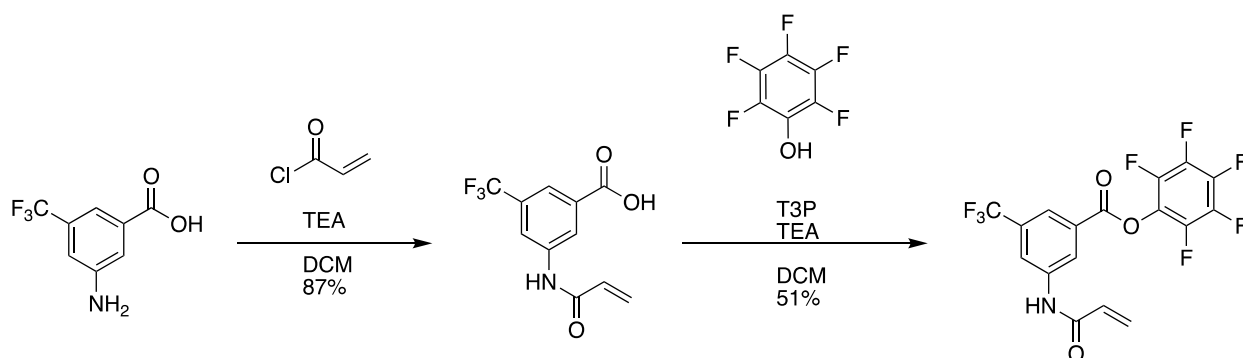

**Perfluorophenyl 3-acrylamido-5-(trifluoromethyl)benzoate (20).** To a solution of 3-aminobenzenesulfonyl fluoride hydrochloride (300 mg, 1.46 mmol, 1 equiv.) in 6 mL DCM was added TEA (0.73 mmol, 612  $\mu$ L, 3 equiv.), acryloyl chloride (2.92 mmol, 236  $\mu$ L, 2 equiv.) in an ice bath. Next the reaction was allowed to react for 3h at RT. The reaction was quenched with 30 mL saturated  $\text{NaHCO}_3$  (aq), extracted with DCM ( $2 \times 20$  mL), and was concentrated to afford product as a brown solid without further purification. Partial of the brown solid (149 mg, 0.58 mmol, 1 equiv.) was redissolved in 4 ml DCM. 2,3,4,5,6-pentafluorophenol (106 mg, 0.58 mmol, 1 equiv.) was added into the solution, followed by the addition of TEA (0.24 mL) and propylphosphonic anhydride (TP3, 0.4 mL, 50+% w/w soln. in acetonitrile). The reaction was stirred for 40 min at RT. The reaction mixture was concentrated and purified by silica column chromatography (2:1 hexanes/ EtOAc) to afford title compound (125.8 mg, 51%) as a pale oil.  $^1\text{H}$  NMR (500 MHz,  $\text{CDCl}_3$ ):  $\delta$  8.53 (s, 1H), 8.37 (s, 1H), 8.18 (s, 1H), 7.75 (s, 1H), 6.52 (dd,  $J = 16.9, 1.05$  Hz, 1H), 6.28 (dd,  $J = 16.9, 10.2$  Hz, 1H), 5.88 (dd,  $J = 10.2, 1.05$  Hz, 1H);  $^{13}\text{C}$  NMR (125 MHz,  $\text{CDCl}_3$ ):  $\delta$  164.0, 161.3, 139.48, 133.0, 130.28, 129.9, 128.9, 124.6, 124.3, 124.1, 123.1, 122.9, 122.4, 122.2, 122.1;  $^{19}\text{F}$ -NMR (376 MHz,  $\text{CDCl}_3$ )  $\delta$  63.0. HRMS-ESI ( $m/z$ ) calculated for  $\text{C}_{17}\text{H}_6\text{F}_8\text{NO}_3$  [ $\text{M}-\text{H}$ ] $^-$ : 412.022; found: 412.0201.

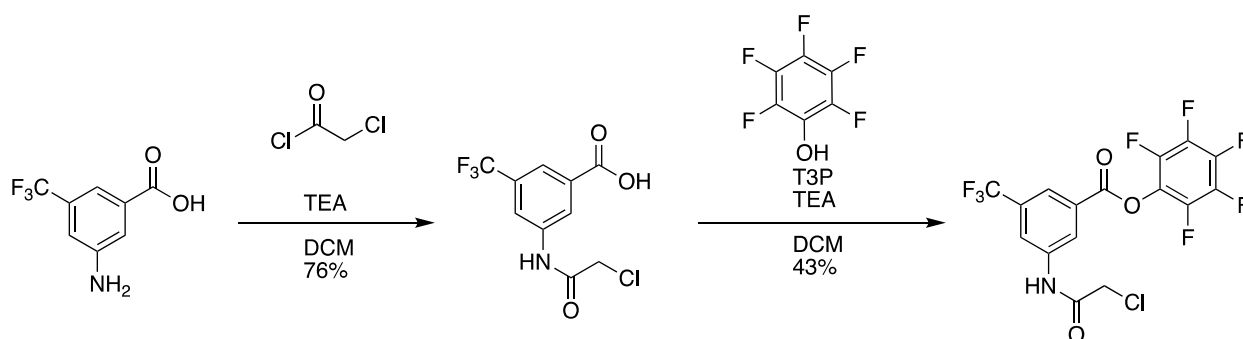

**Perfluorophenyl 3-(2-chloroacetamido)-5-(trifluoromethyl)benzoate (21).** To a solution of 3-aminobenzenesulfonyl fluoride hydrochloride (300 mg, 1.46 mmol, 1 equiv.) in 6 mL DCM was added TEA (0.73 mmol, 612  $\mu$ L, 3 equiv.), 2-chloroacetyl chloride (2.92 mmol, 232  $\mu$ L, 2 equiv.) in an ice bath. Next the reaction was allowed to react for 3h at RT. The reaction was quenched with 30 mL saturated  $\text{NaHCO}_3$  (aq), extracted with DCM ( $2 \times 20$  mL), and was concentrated to afford 3-(2-chloroacetamido)-5-(trifluoromethyl)benzoic acid which was used without further purification. Partial of the product (50 mg, 0.18 mmol, 1 equiv.) was redissolved in 1 ml DCM. 2,3,4,5,6-pentafluorophenol (33.2 mg, 0.18 mmol, 1 equiv.) was added into the solution, followed by the addition of TEA (60  $\mu$ L) and propylphosphonic anhydride (TP3, 0.15 mL, 50+% w/w soln. in acetonitrile). The reaction was stirred for 40 min at RT. The reaction mixture was concentrated

and purified by preparative thin layer chromatography (PTLC) (2:1 hexanes/ EtOAc) to afford title compound (34.7 mg, 43%) as brown oil.  $^1\text{H}$  NMR (500 MHz,  $\text{CDCl}_3$ ):  $\delta$  8.56 (s, 1H), 8.50 (s, 1H), 8.32 (s, 1H), 8.24 (s, 1H), 4.25 (s, 2H);  $^{13}\text{C}$  NMR (125 MHz,  $\text{CDCl}_3$ ):  $\delta$  164.4, 161.0, 138.3, 132.9, 132.7, 128.9, 124.6, 124.1, 123.7, 123.6, 122.4, 122.3, 121.9, 42.7;  $^{19}\text{F}$ -NMR (376 MHz,  $\text{CDCl}_3$ )  $\delta$  62.9. HRMS-ESI (m/z) calculated for  $\text{C}_{16}\text{H}_6\text{F}_8\text{NO}_3$  [M-H] $^-$ : 412.022; found: 412.022.

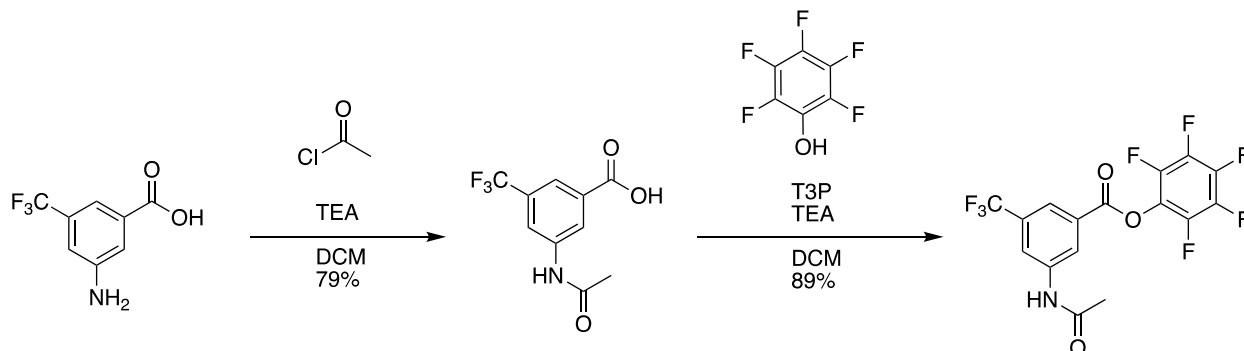

**Perfluorophenyl 3-acetamido-5-(trifluoromethyl)benzoate (22).** To a solution of 3-aminobenzenesulfonyl fluoride hydrochloride (300 mg, 1.46 mmol, 1 equiv.) in 6 mL DCM was added TEA (0.73 mmol, 612  $\mu\text{L}$ , 3 equiv.), acetyl chloride (2.92 mmol, 208  $\mu\text{L}$ , 2 equiv.) in an ice bath. Next the reaction was allowed to react for 3h at RT. The reaction was quenched with 30 mL saturated  $\text{NaHCO}_3$  (aq), extracted with DCM (2  $\times$  20 mL), and was concentrated to afford 3-acetamido-5-(trifluoromethyl)benzoic acid which was used without further purification. Partial of the product (40 mg, 0.16 mmol, 1 equiv.) was redissolved in 1 ml DCM. 2,3,4,5,6-pentafluorophenol (29.7 mg, 0.16 mmol, 1 equiv.) was added into the solution, followed by the addition of TEA (67  $\mu\text{L}$ ) and propylphosphonic anhydride (TP3, 0.15 mL, 50+% w/w soln. in acetonitrile). The reaction was stirred for 40 min at RT. The reaction mixture was concentrated and purified by preparative thin layer chromatography (PTLC) (2:1 hexanes/ EtOAc) to afford title compound (58.9 mg, 89%) as a yellow solid.  $^1\text{H}$  NMR (500 MHz,  $\text{CDCl}_3$ ):  $\delta$  8.43 (s, 1H), 8.28 (s, 1H), 8.16 (s, 1H), 7.68 (s, 1H), 2.25 (s, 3H);  $^{13}\text{C}$  NMR (125 MHz,  $\text{CDCl}_3$ ):  $\delta$  168.7, 161.2, 139.4, 132.7, 132.4, 128.6, 124.2, 122.8, 122.7, 122.1, 122.0, 121.9, 24.6;  $^{19}\text{F}$ -NMR (376 MHz,  $\text{CDCl}_3$ )  $\delta$  63.0. HRMS-ESI (m/z) calculated for  $\text{C}_{16}\text{H}_5\text{ClF}_8\text{NO}_3$  [M-H] $^-$ : 445.983; found: 445.9832.



(F)  $^1\text{H}$ ,  $^{13}\text{C}$  NMR and  $^{19}\text{F}$  spectra.

$^1\text{H}$ -NMR for **1**.

cj-l-new IA probe.10.fid

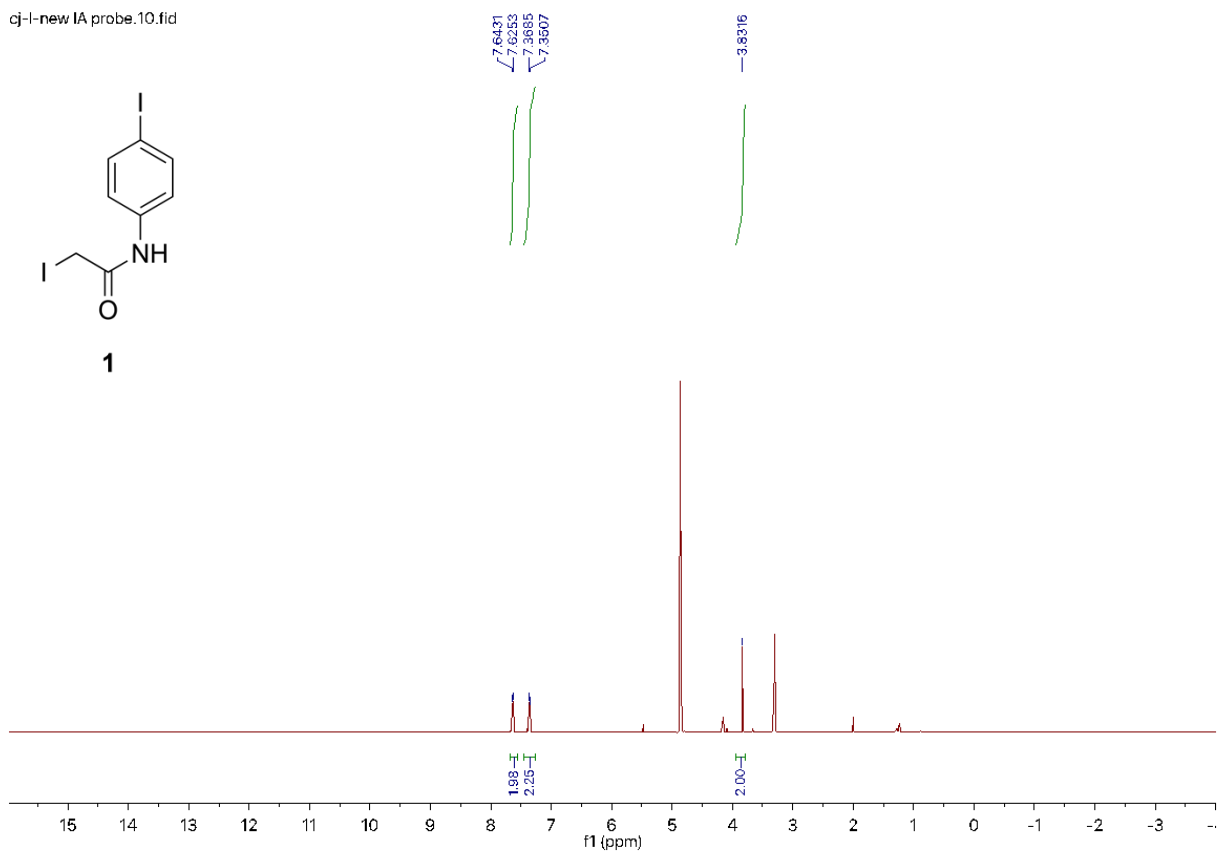

# <sup>13</sup>C-NMR for 1.

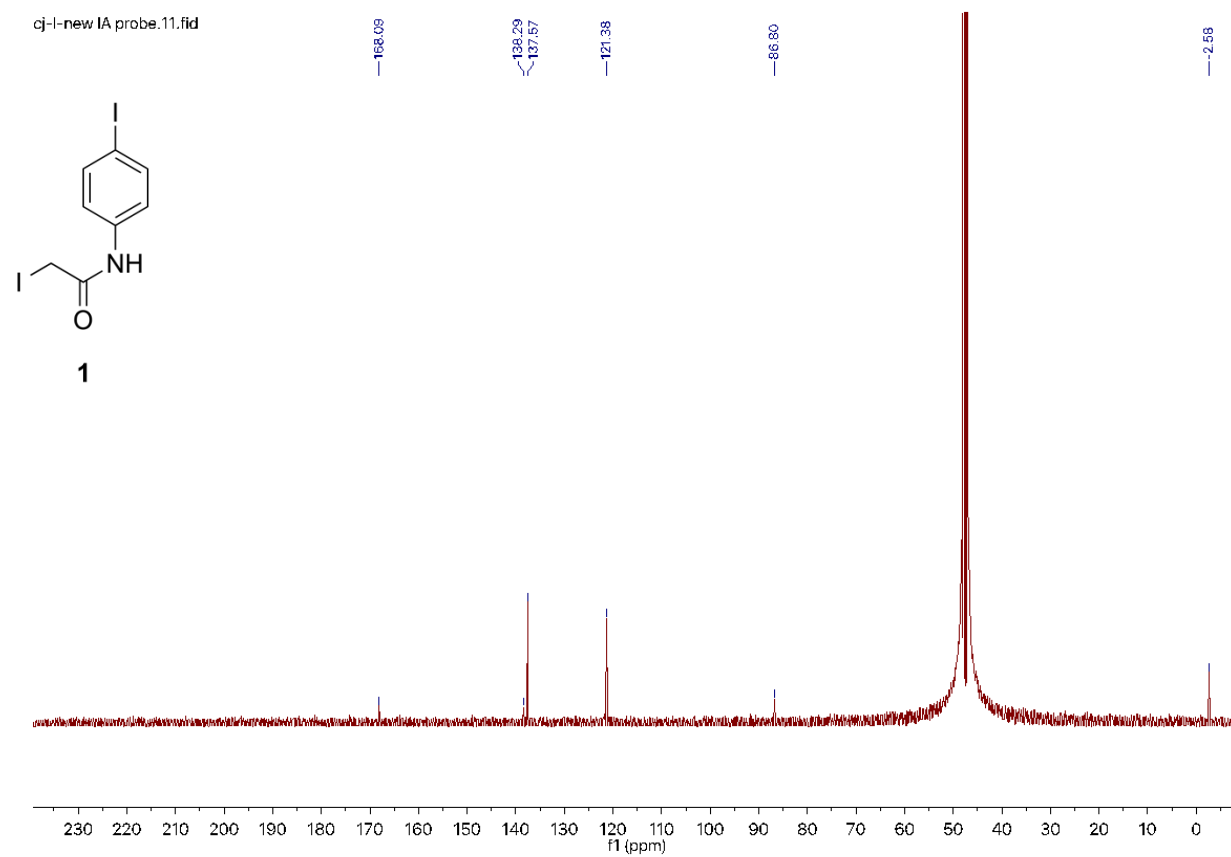

# <sup>1</sup>H-NMR for 2.

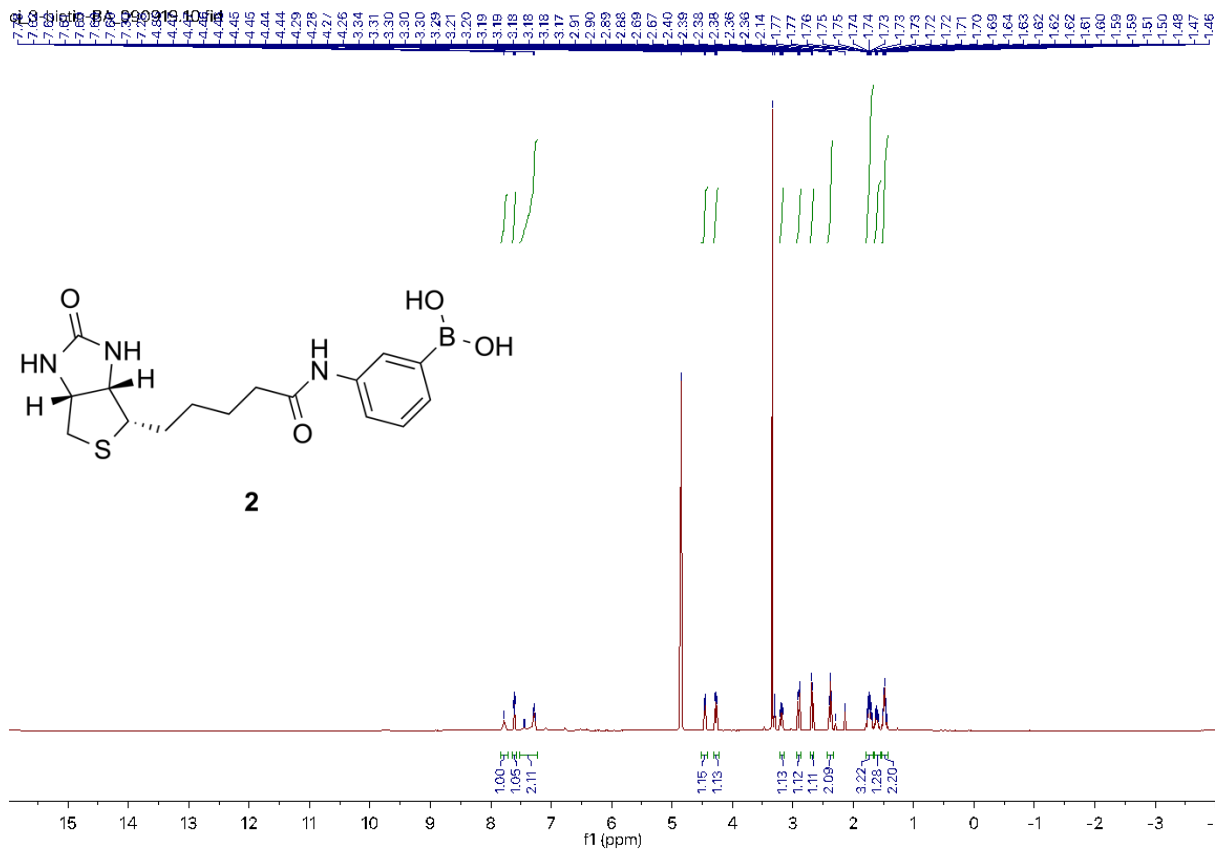

# <sup>13</sup>C-NMR for 2

cj\_3-biotin-BA\_090919.11.fid

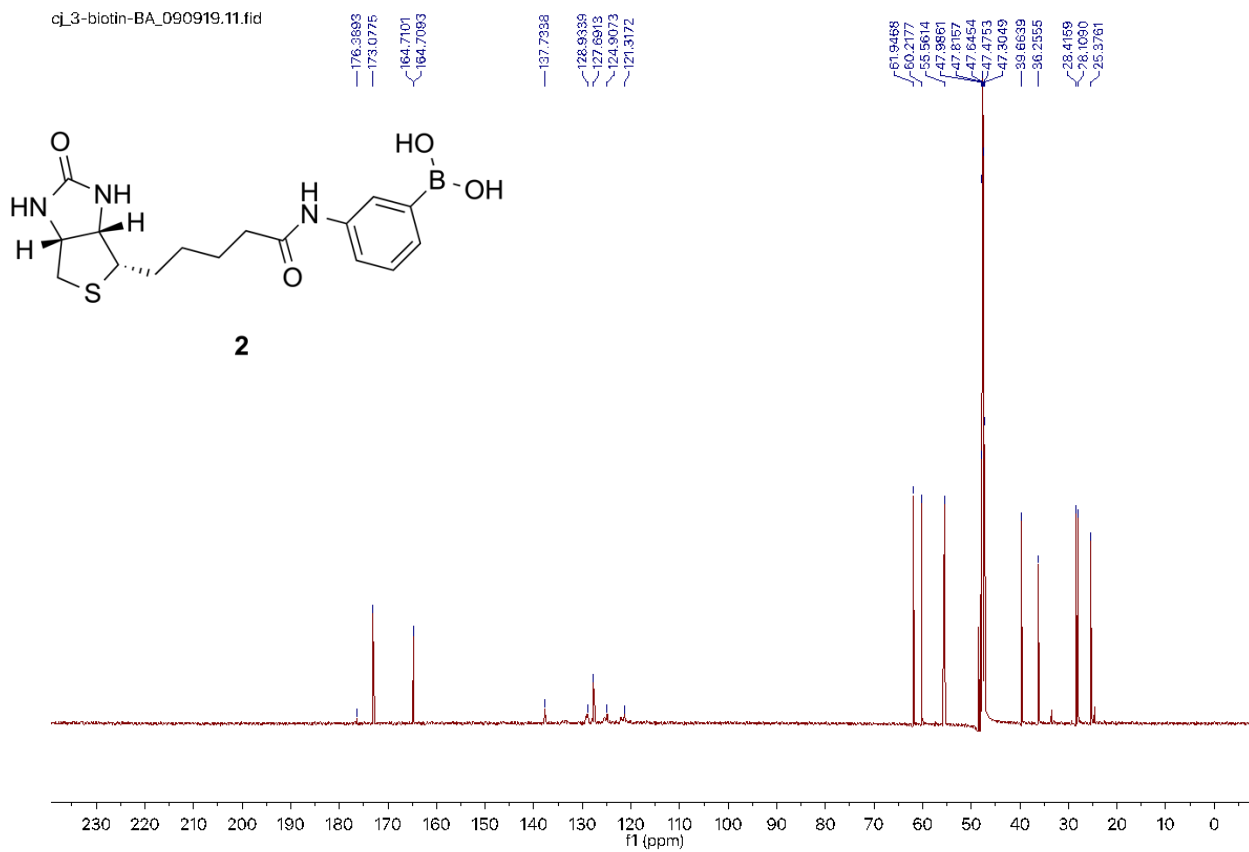

# <sup>1</sup>H-NMR for 3.

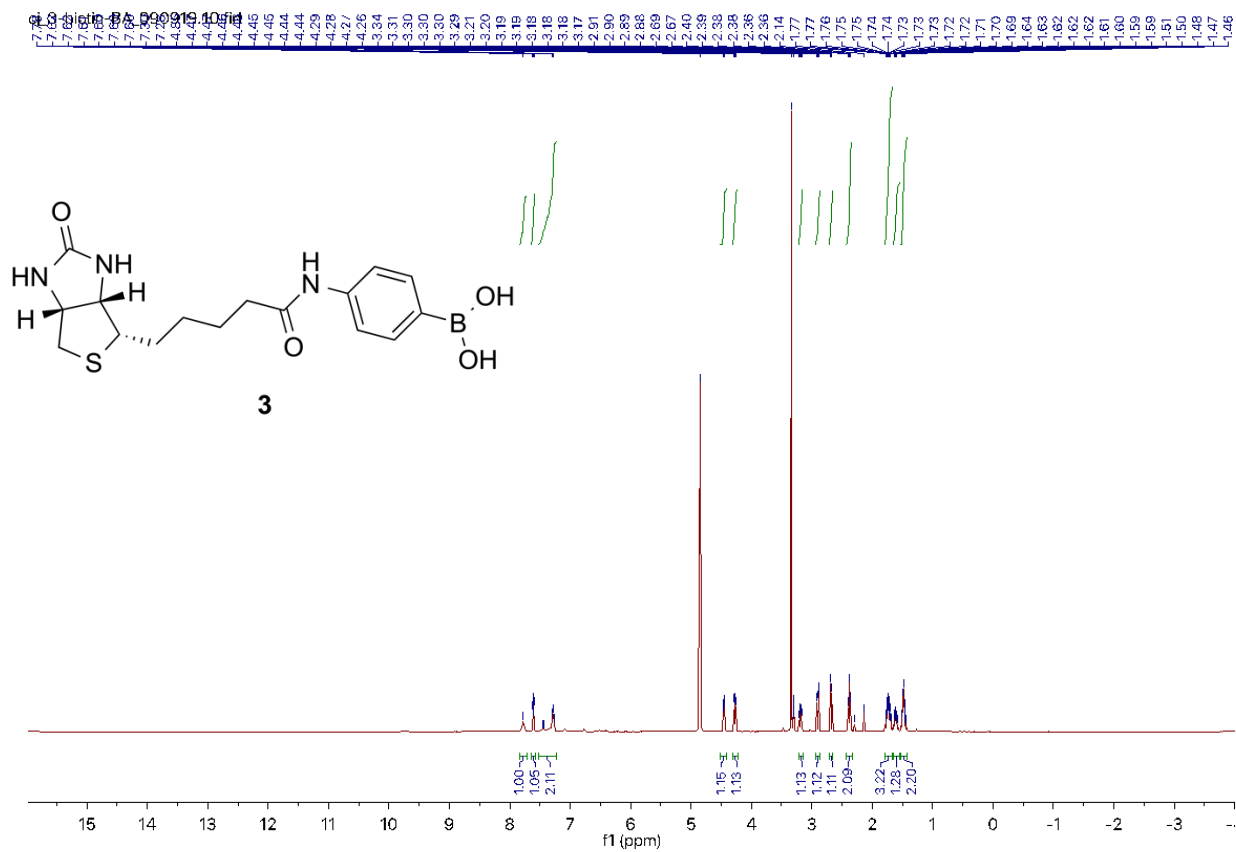

### <sup>13</sup>C-NMR for 3.

JC-biotin boronic acid carbon.1.fid  
default proton parameters

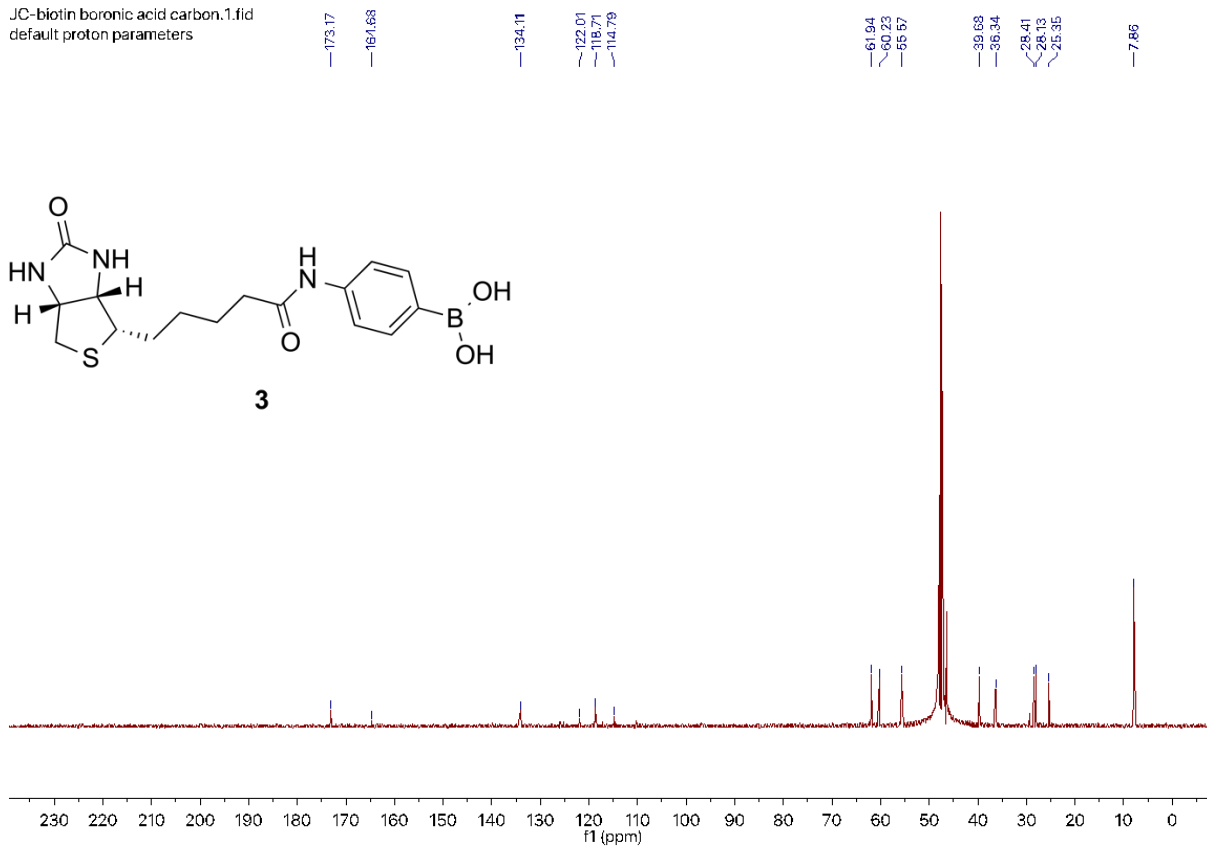

# <sup>1</sup>H-NMR for 5.

cj\_115.10.fid

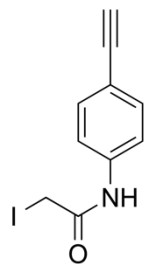

5

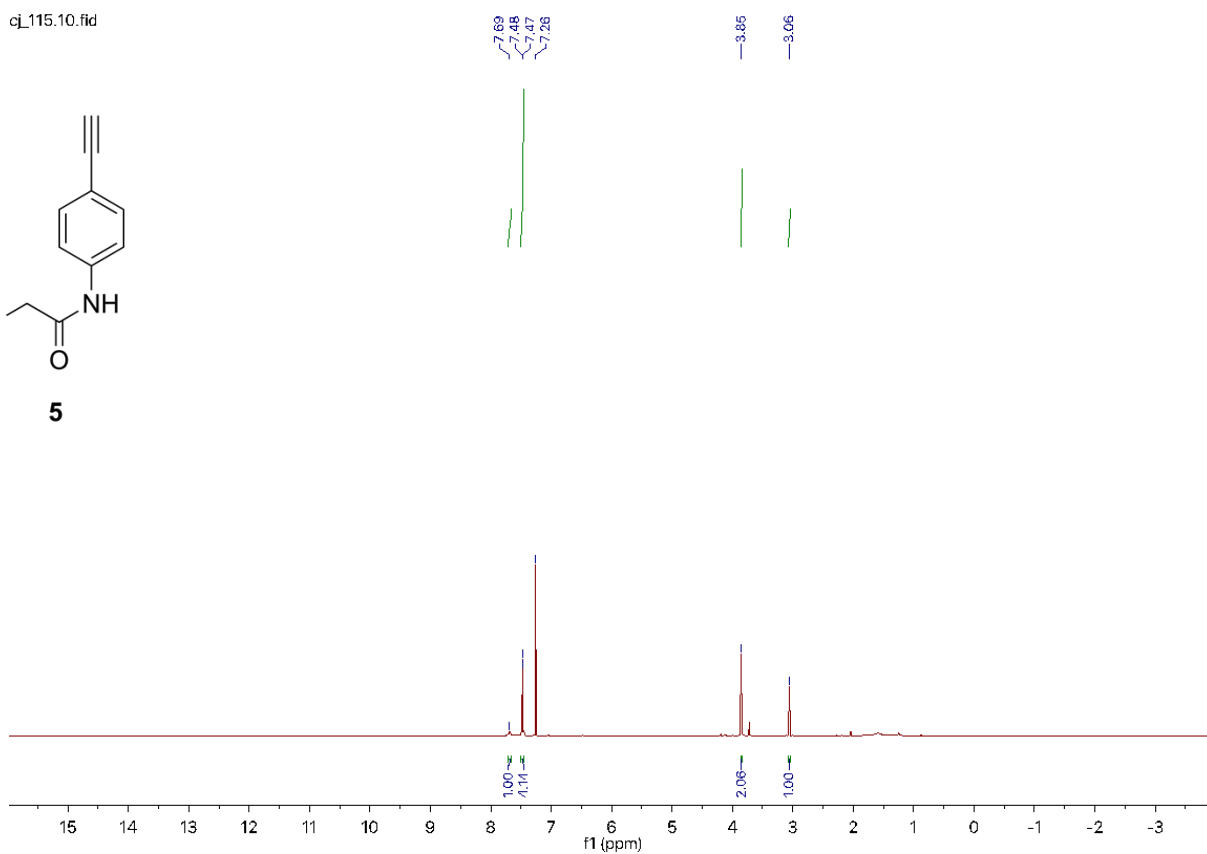

# <sup>1</sup>H-NMR for 5.

cL115.11.fid

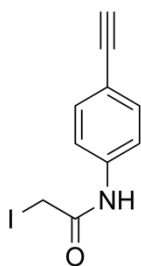

5

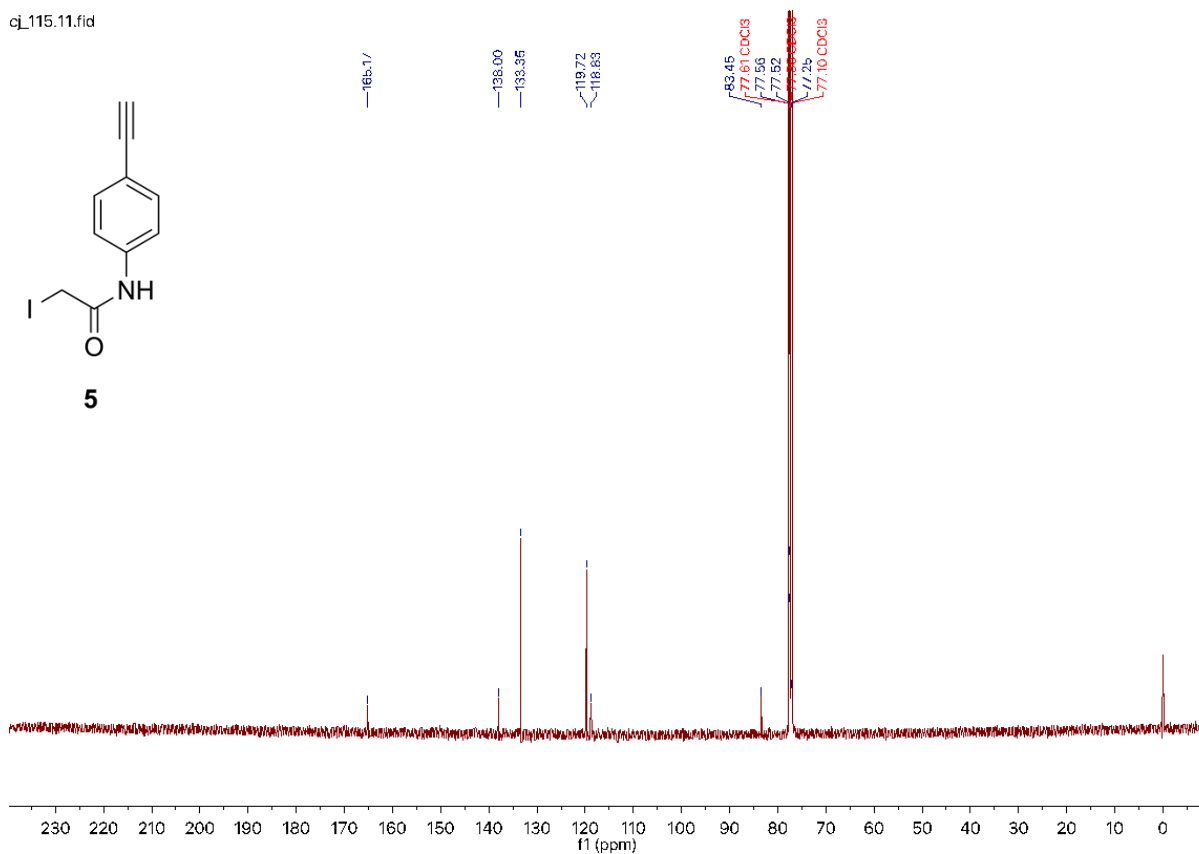



### <sup>1</sup>H-NMR for 6.

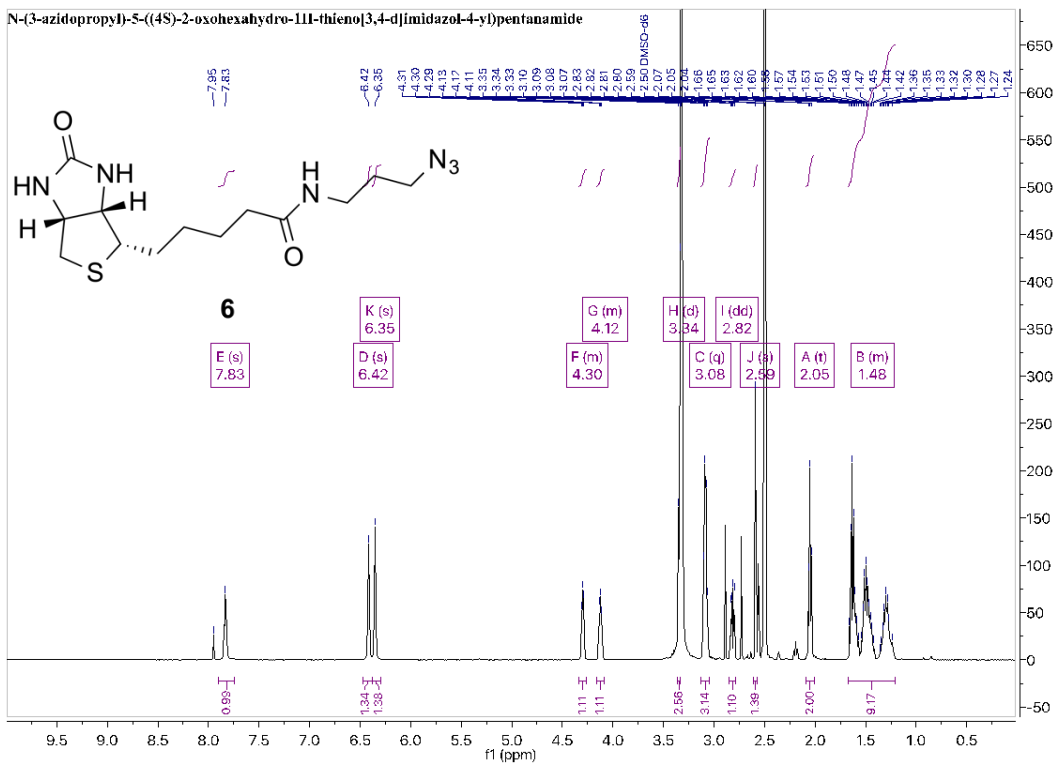

### <sup>13</sup>C-NMR for 6.

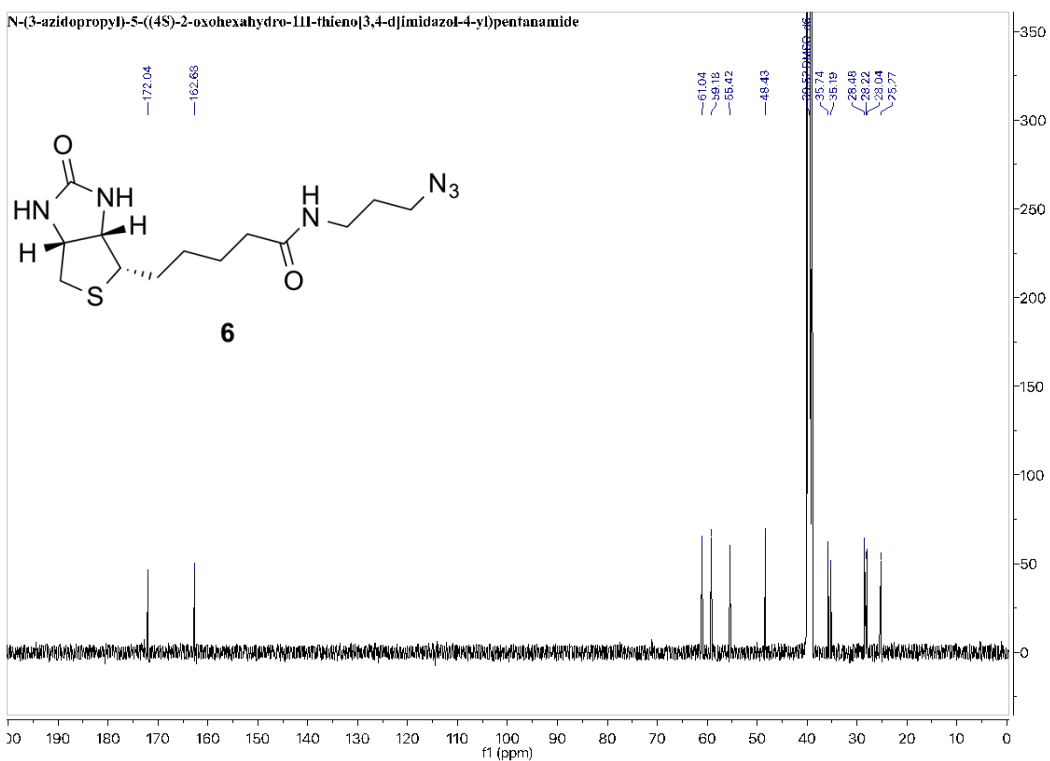

# <sup>1</sup>H-NMR for 15.

cj\_biotin\_linker\_methyl ester.10.fid

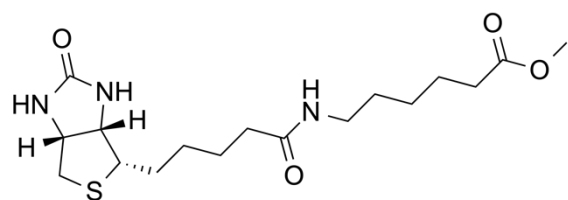

15

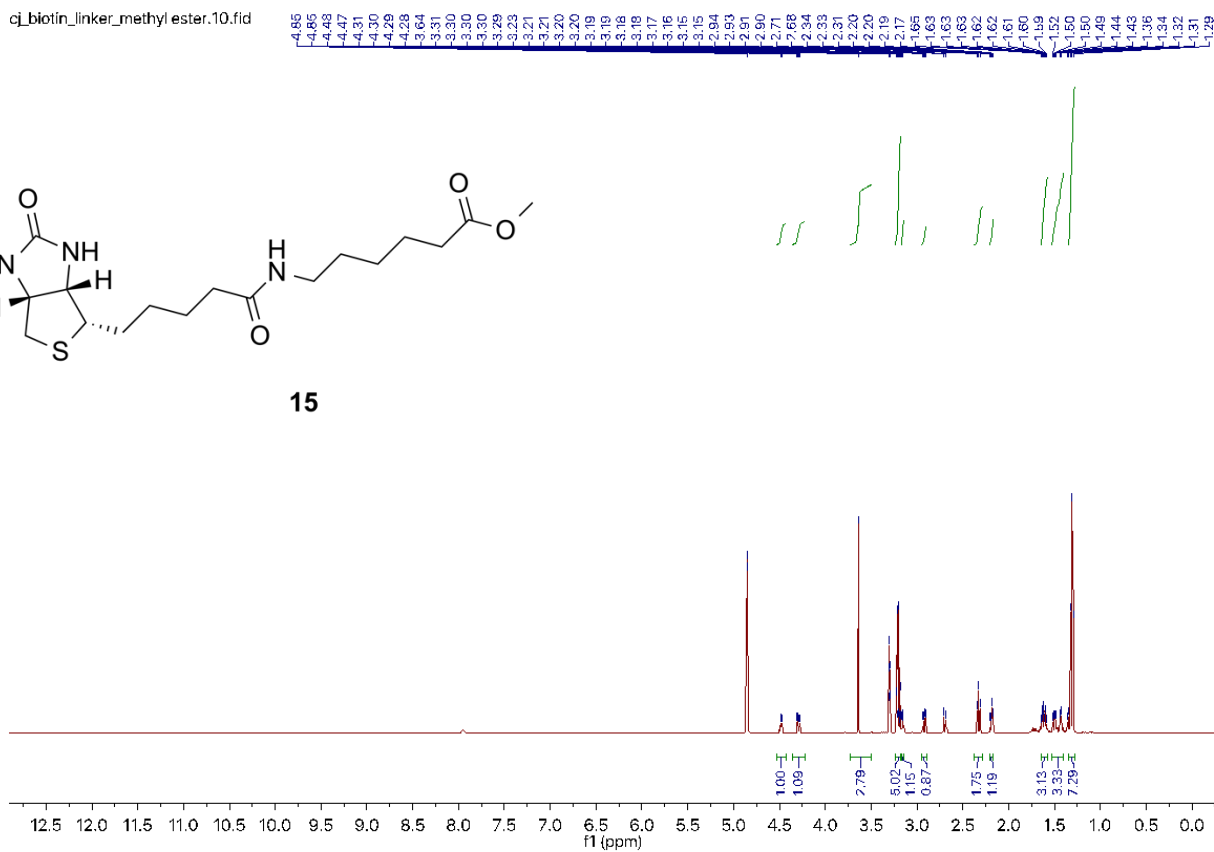

# <sup>13</sup>C-NMR for 15.

cj\_biotin\_linker\_methyl ester.11.fid

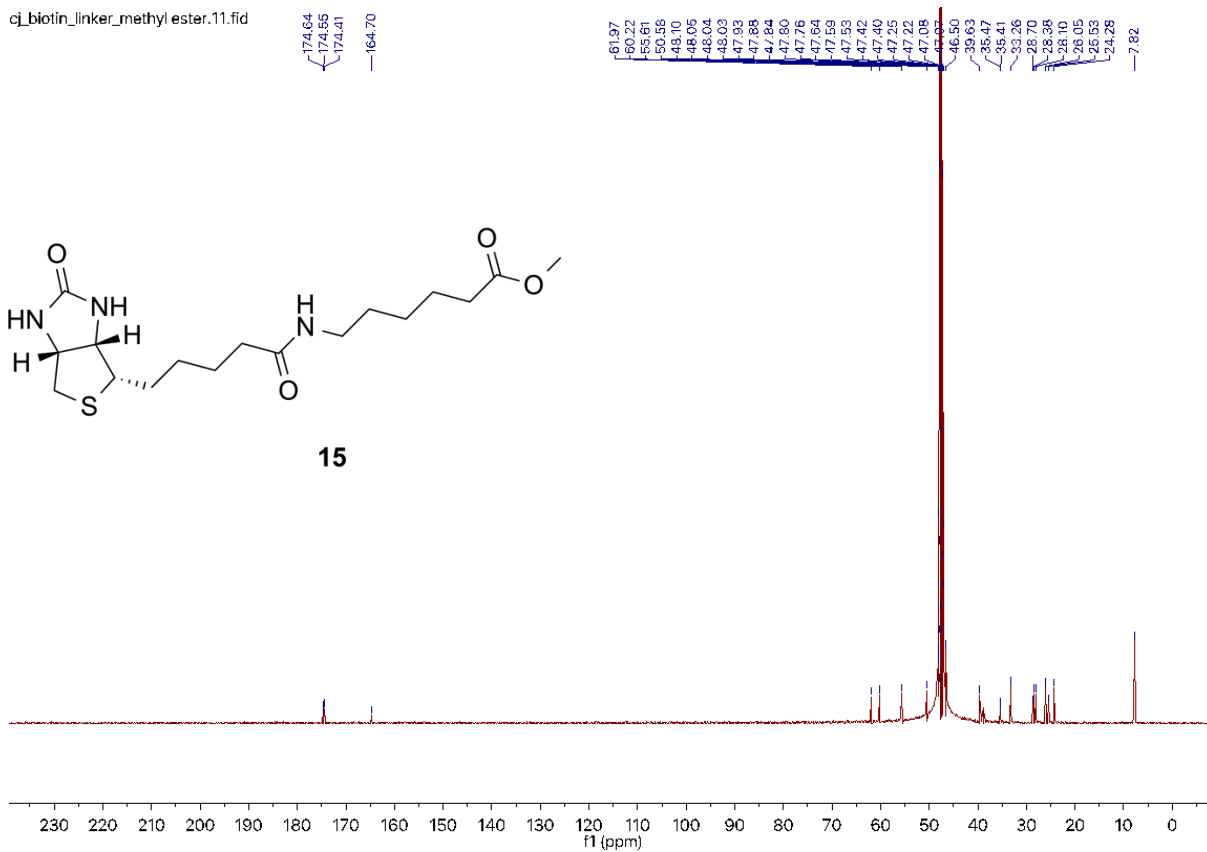

**<sup>1</sup>H-NMR for 7.**

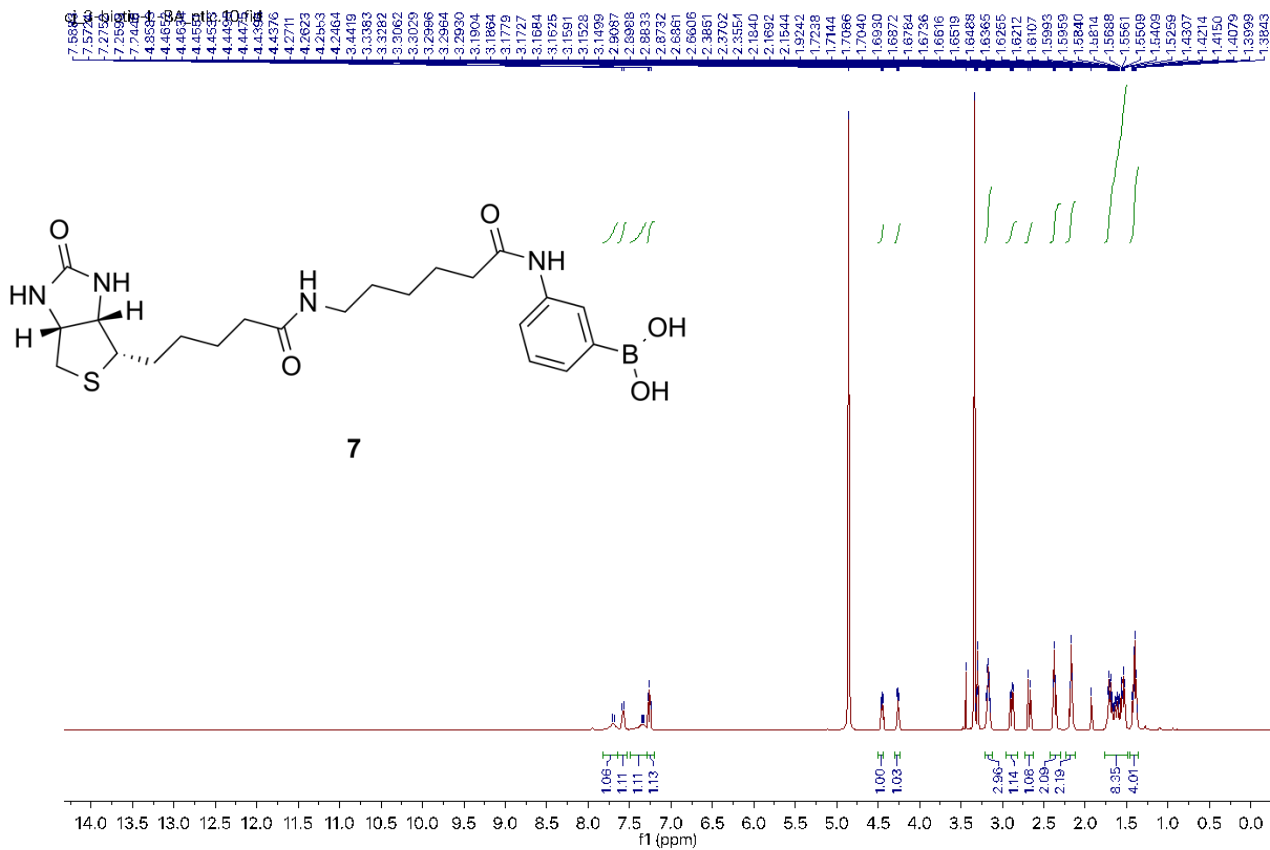

# <sup>13</sup>C-NMR for 7.

cj\_3-biotin-L-BA\_ptlc.11.fid

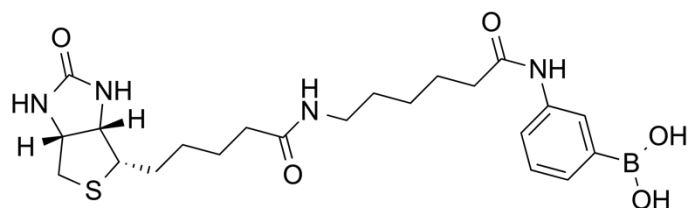

7

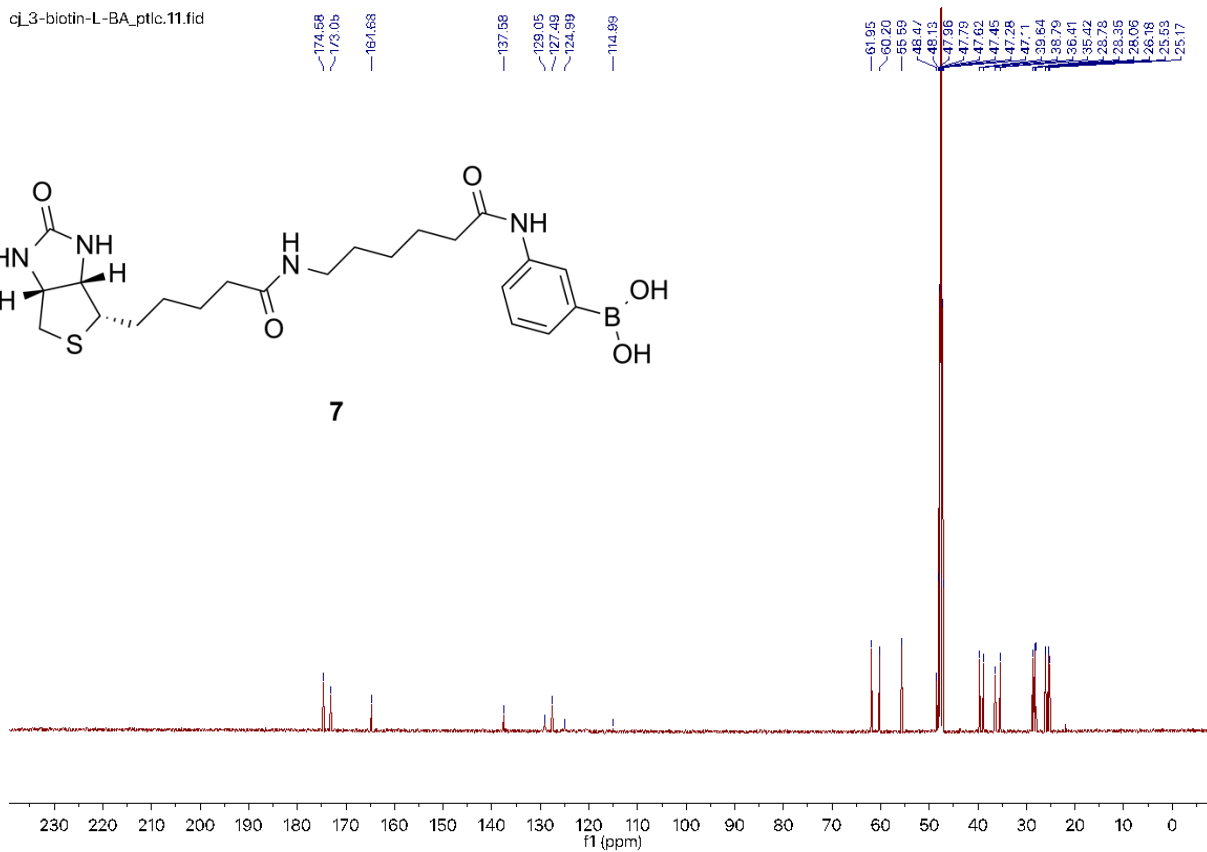

# <sup>1</sup>H-NMR for 8.

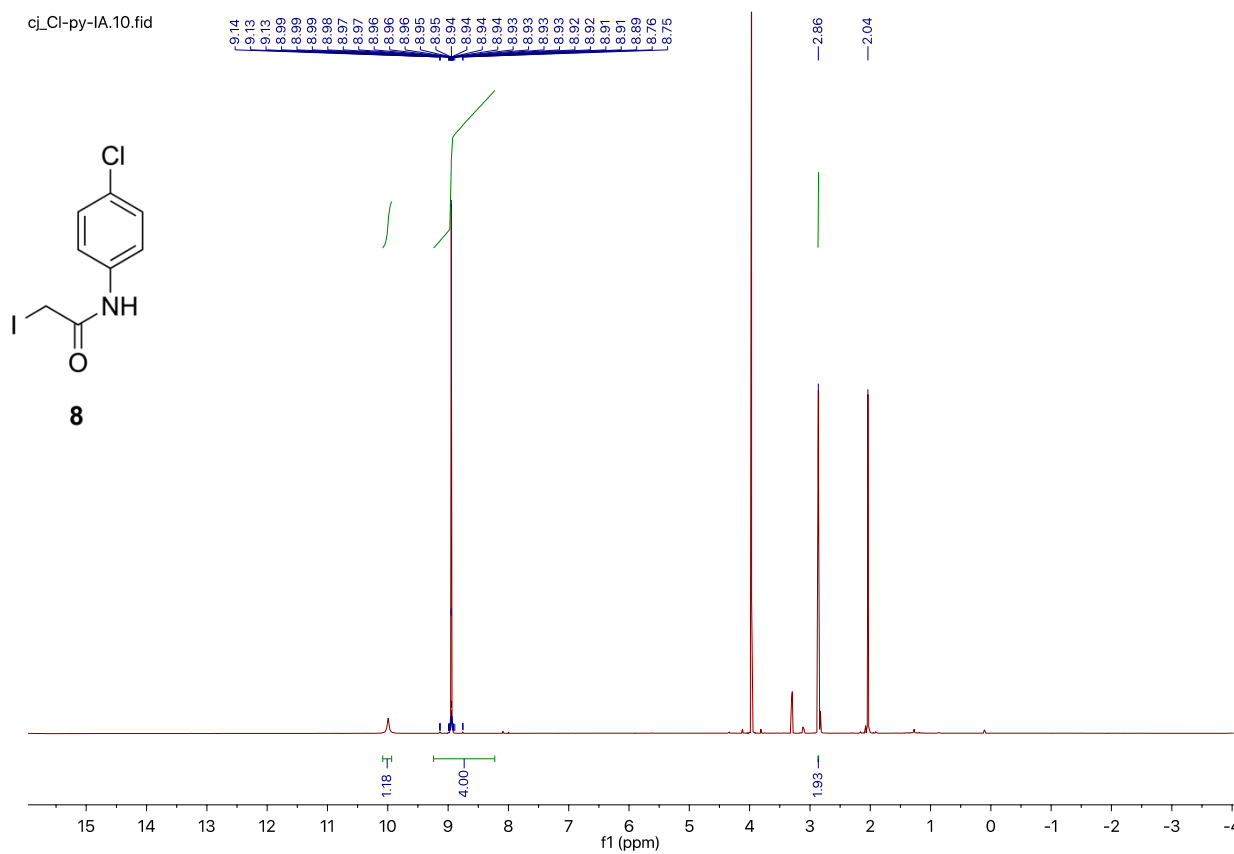

# <sup>13</sup>C-NMR for 8.

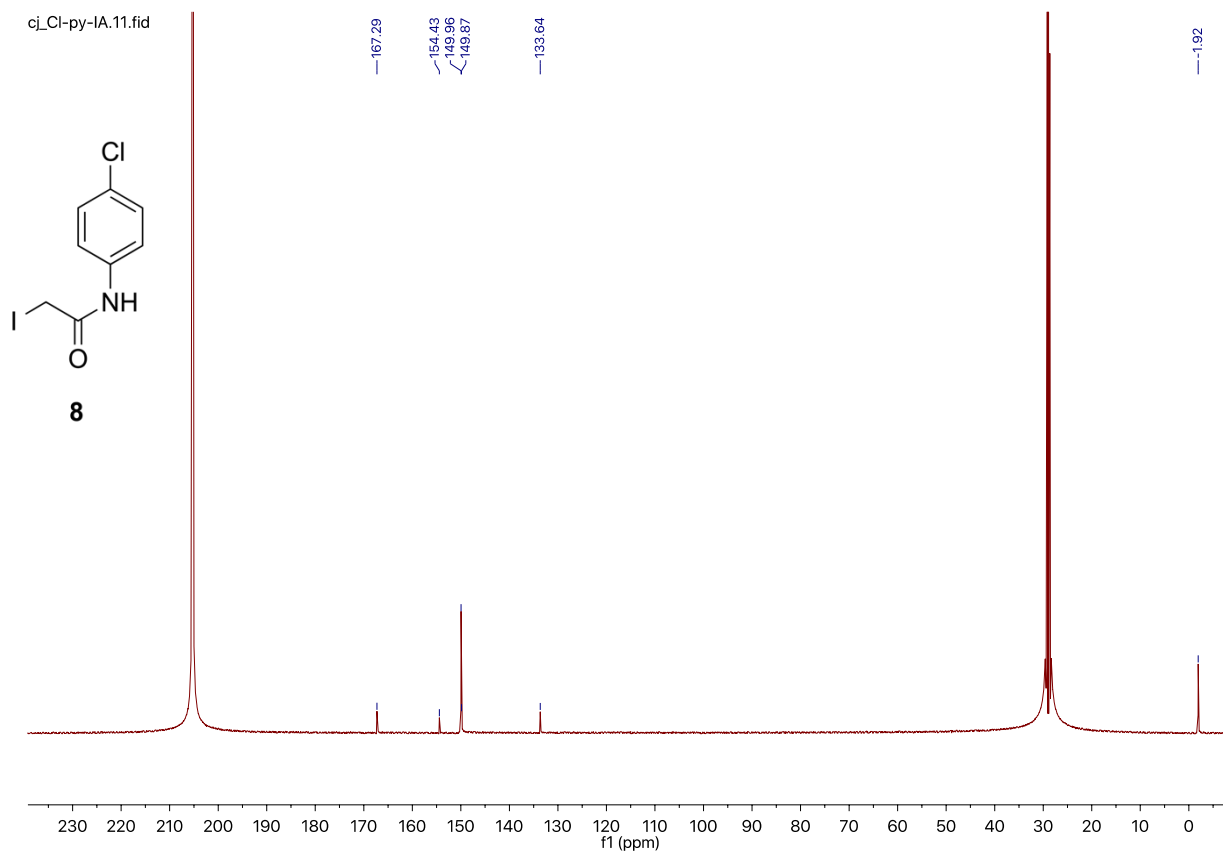

# <sup>1</sup>H-NMR for 9.

Apr12-2019-schanger.100.fid  
Account No. YYZ621  
I-EA-032-1 Purified

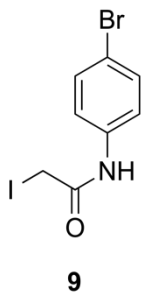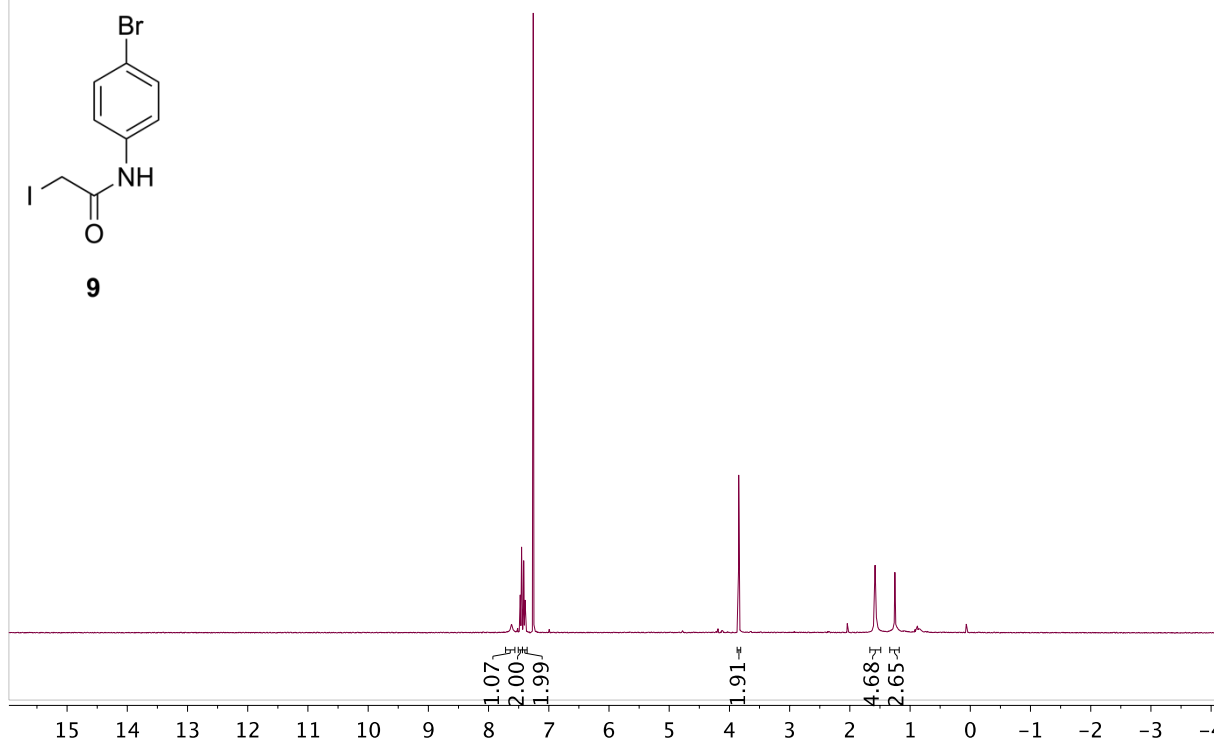



# <sup>1</sup>H-NMR for 10.

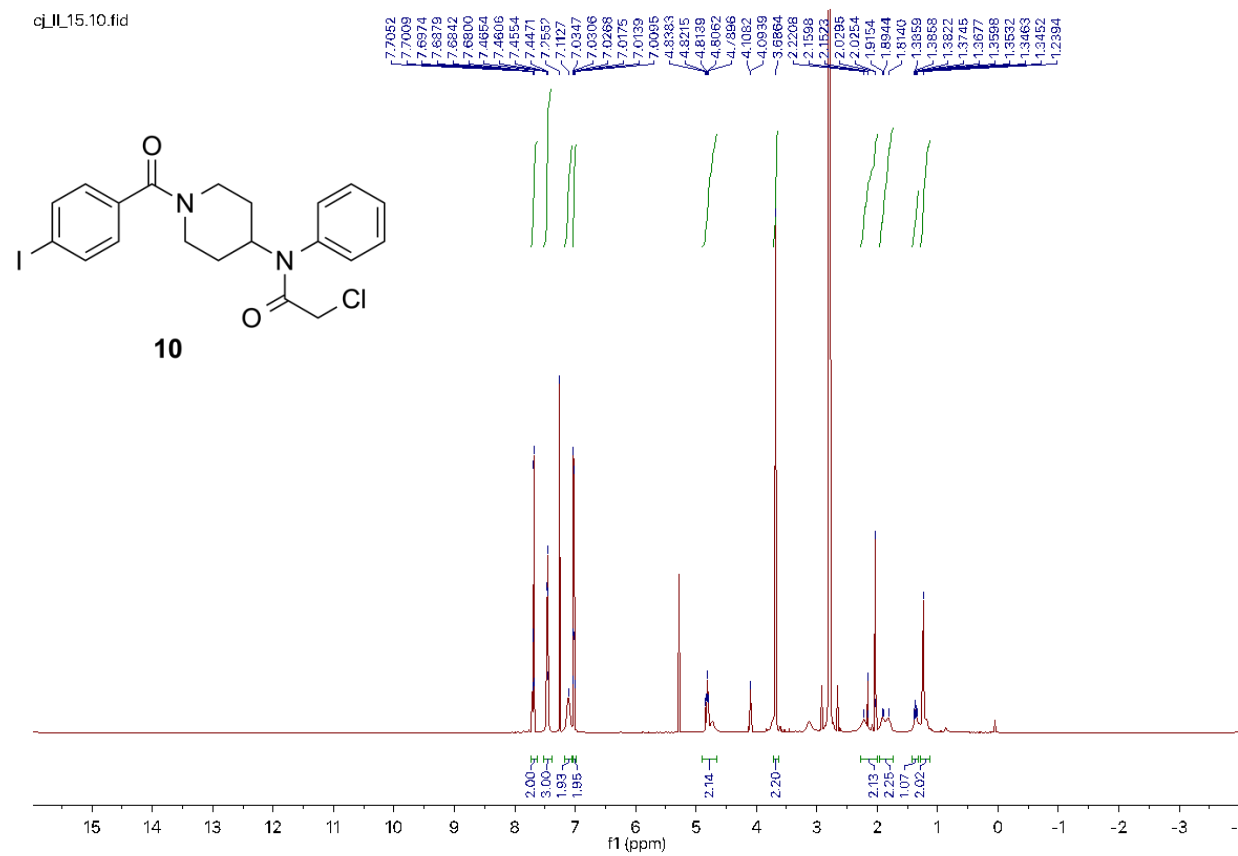

# <sup>13</sup>C-NMR for 10.

cjll\_15.11.fid

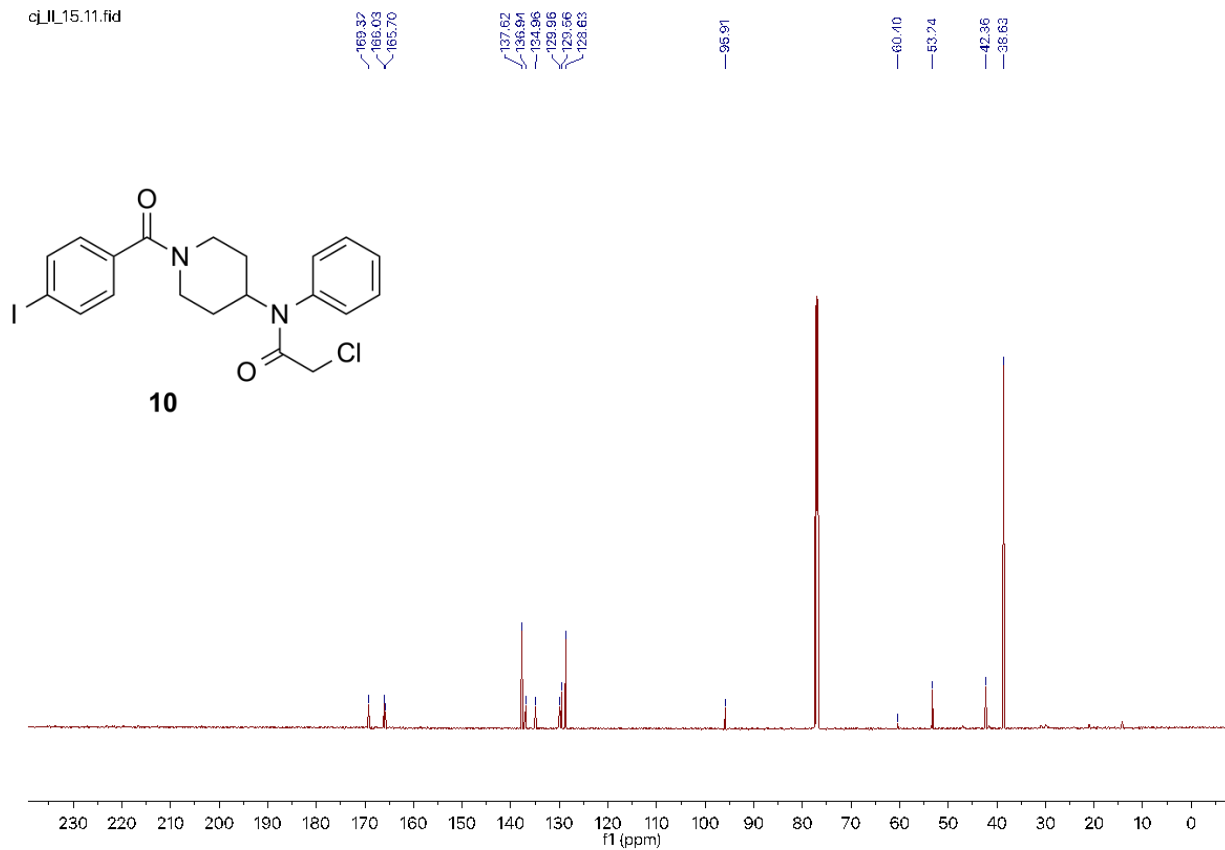

# <sup>1</sup>H-NMR for 11.

cj\_LL16.10.fid

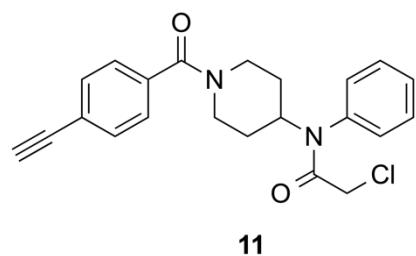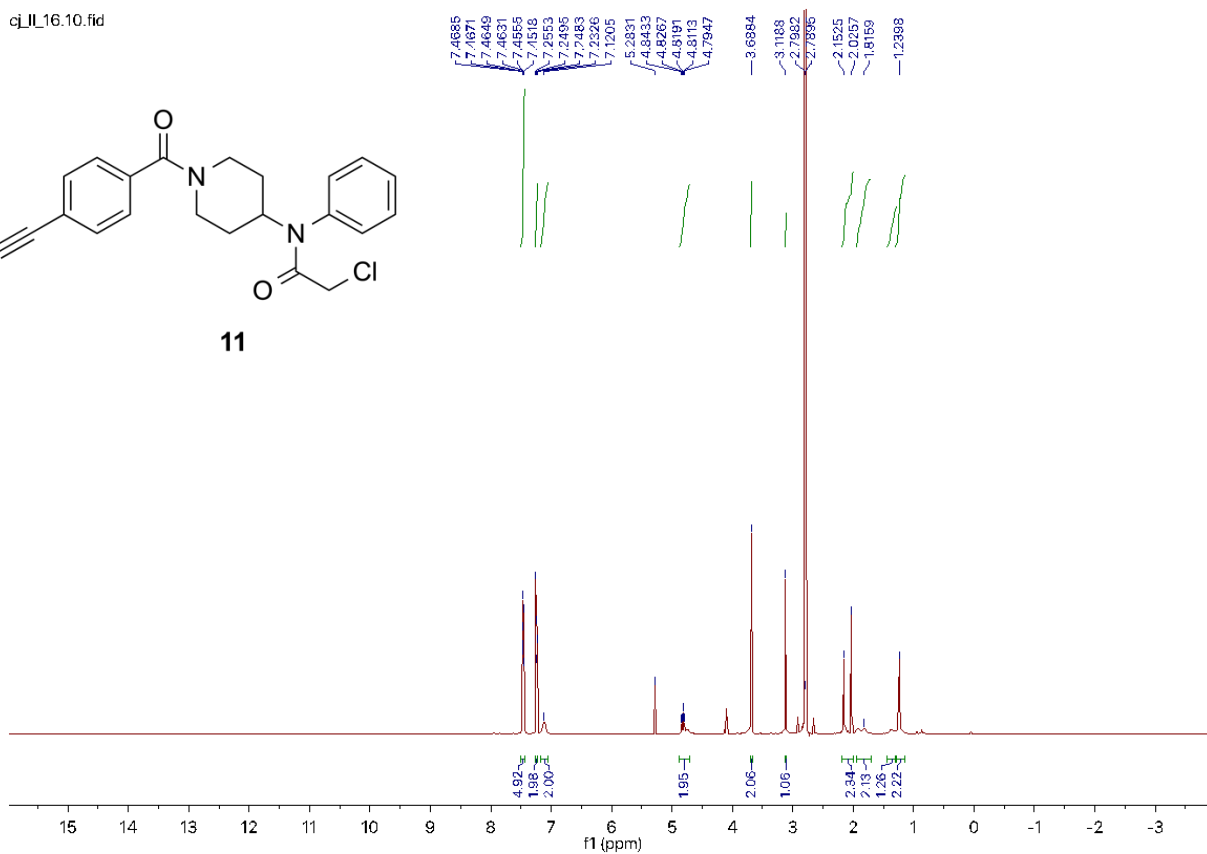

# <sup>13</sup>C-NMR for 11.

cj\_L16.11.fid

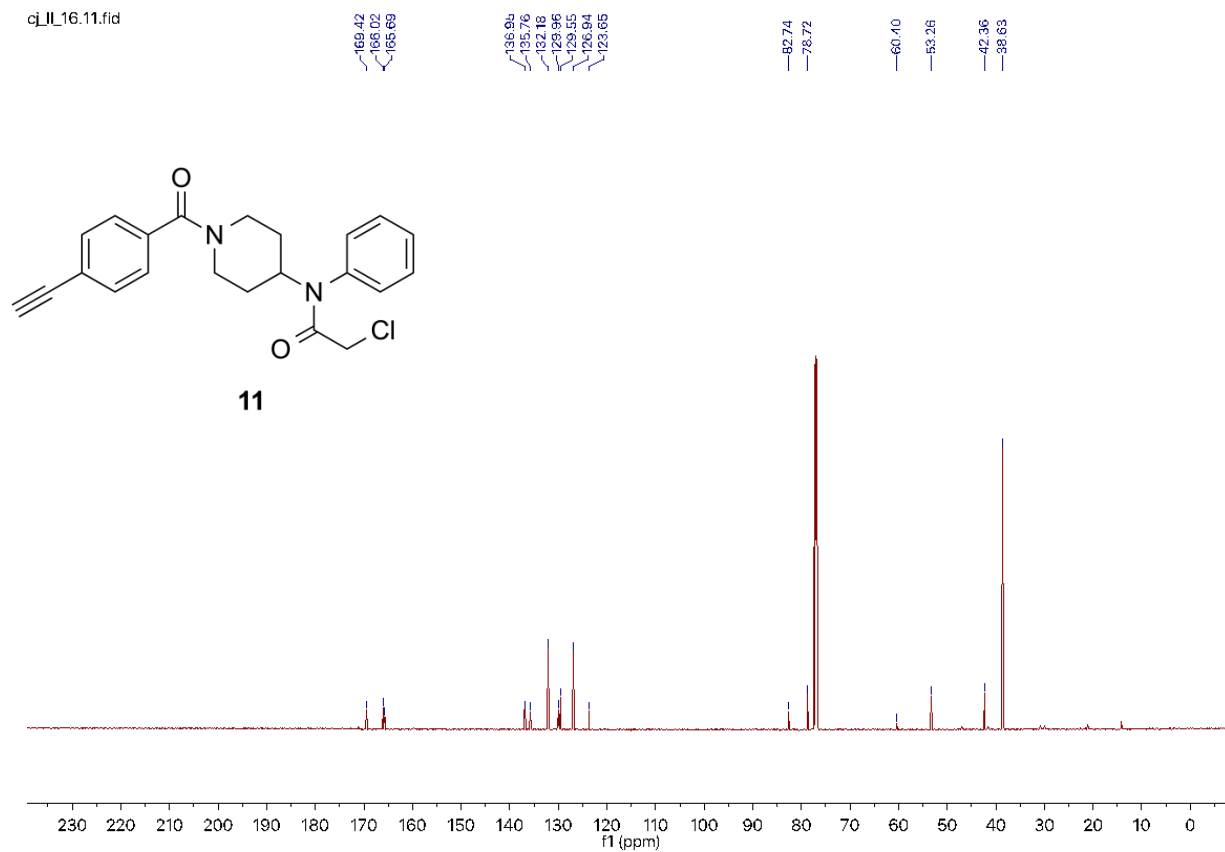

### <sup>1</sup>H-NMR for 13.

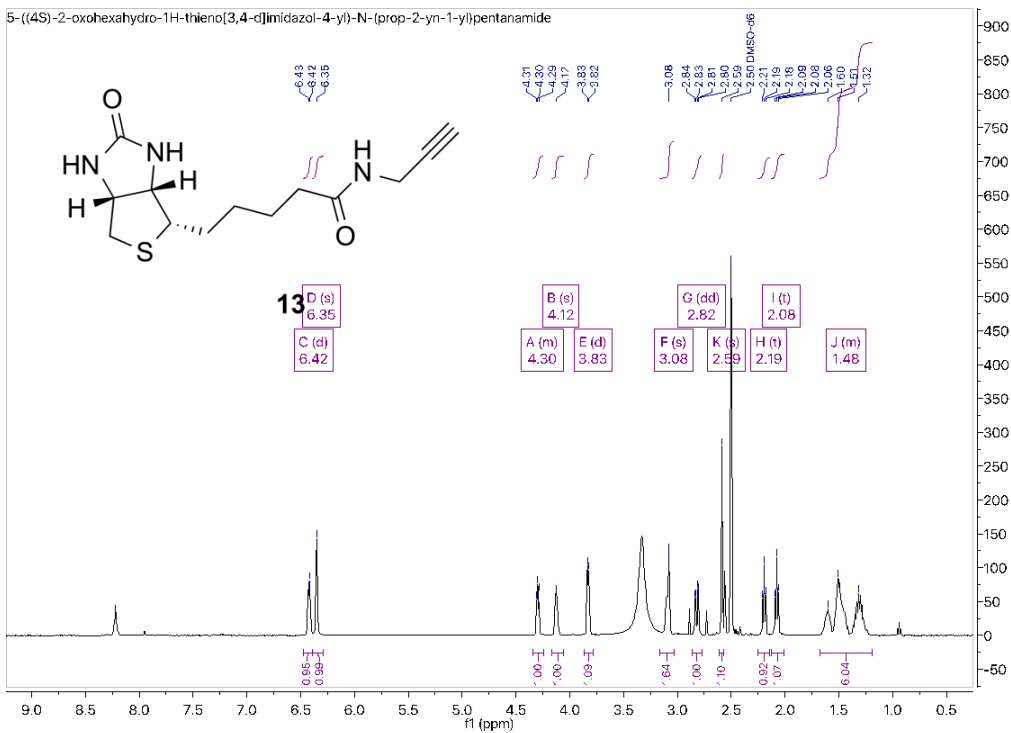

### <sup>13</sup>C-NMR for 13.

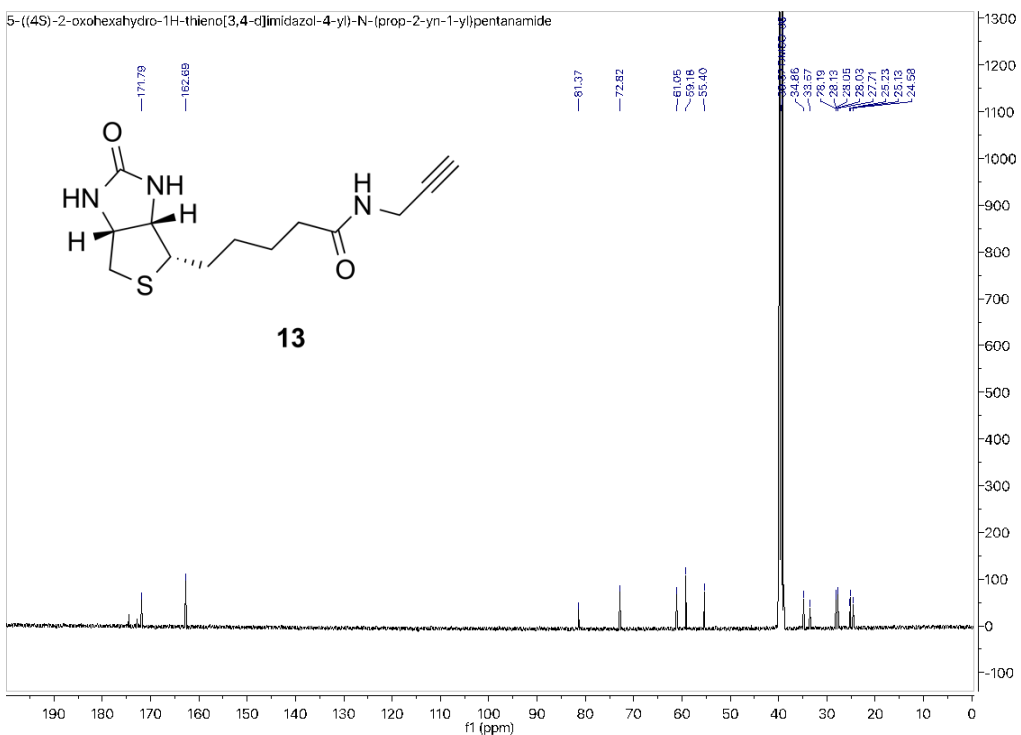

# <sup>1</sup>H-NMR for 15.

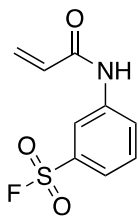

15

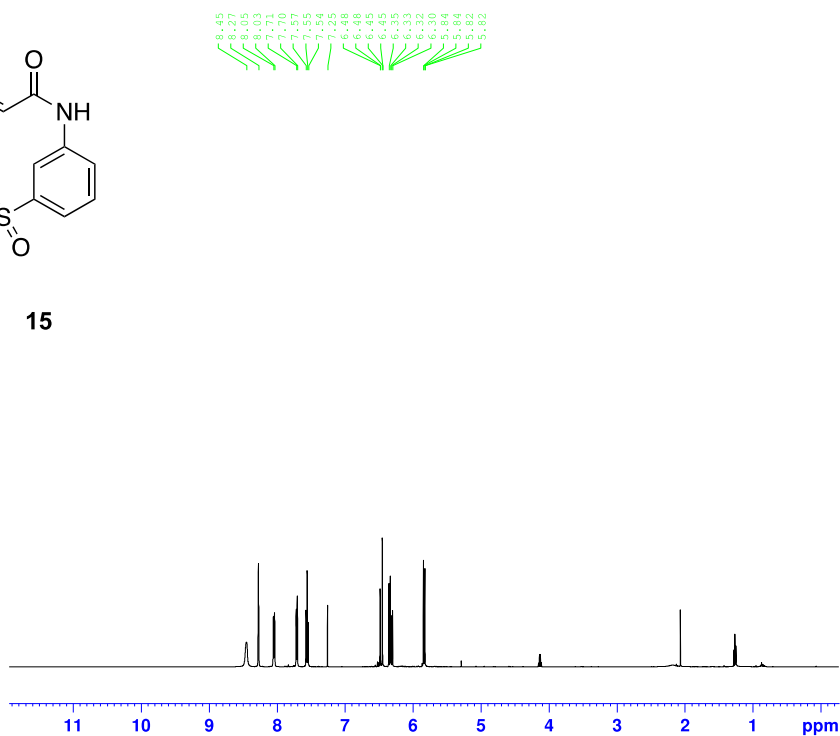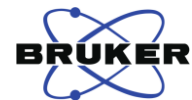

Current Data Parameters  
NAME cj\_III7\_F1  
EXPNO 10  
PROCNO 1

F2 - Acquisition Parameters  
Date\_ 20200423  
Time 14.06 h  
INSTRUM av500  
PROBHD z119248\_0002 (   
PULPROG zg30  
TD 65536  
SOLVENT CDCl3  
NS 8  
DS 0  
SWH 10000.000 Hz  
FIDRES 0.305176 Hz  
AQ 3.2767999 sec  
RG 12.14  
DW 50.000 usec  
DE 10.00 usec  
TE 298.0 K  
D1 2.00000000 sec  
TD0 1  
SFO1 500.1330008 MHz  
NUC1 1H  
P1 10.00 usec  
PLW1 13.50000000 W

F2 - Processing parameters  
SI 65536  
SF 500.1300146 MHz  
WDW EM  
SSB 0  
LB 0.30 Hz  
GB 0  
PC 1.00

# <sup>13</sup>C-NMR for 15.

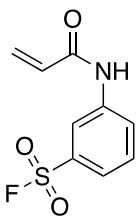

15

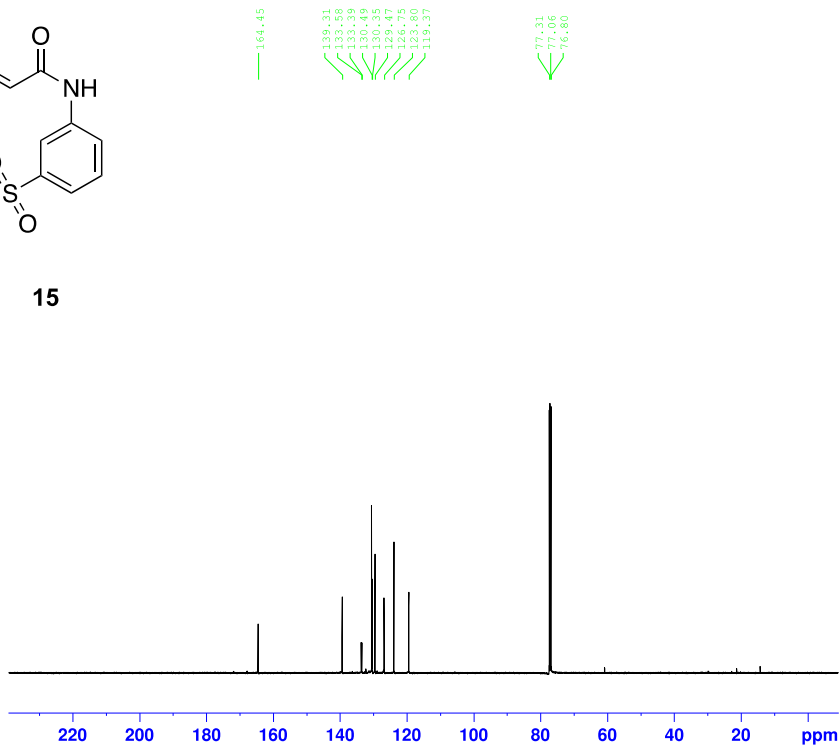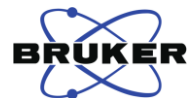

Current Data Parameters  
NAME cj\_1117\_F1  
EXPNO 11  
PROCNO 1

F2 - Acquisition Parameters  
Date\_ 20200423  
Time 14.09 h  
INSTRUM av500  
PROBHD Z119248\_0002 (  
PULPROG zgpg30  
TD 65536  
SOLVENT CDCl3  
NS 32  
DS 2  
SWH 31250.000 Hz  
FIDRES 0.953674 Hz  
AQ 1.0485760 sec  
RG 204.54  
DW 16.000 usec  
DE 28.00 usec  
TE 298.0 K  
D1 2.0000000 sec  
D11 0.0300000 sec  
TD0 1  
SF01 125.7722511 MHz  
NUC1 13C  
P1 10.50 usec  
PLW1 23.0000000 W  
SF02 500.1330008 MHz  
NUC2 1H  
CPDPRG2 waltz16  
PCPD2 80.00 usec  
PLW2 13.5000000 W  
PLW12 0.21094000 W  
PLW13 0.10610000 W

F2 - Processing parameters  
SI 131072  
SF 125.7577890 MHz  
WDW EM  
SSB 0  
LB 1.00 Hz  
GB 0  
FC 1.40

# <sup>19</sup>F-NMR for 15.

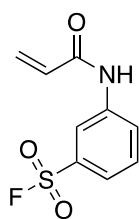

15

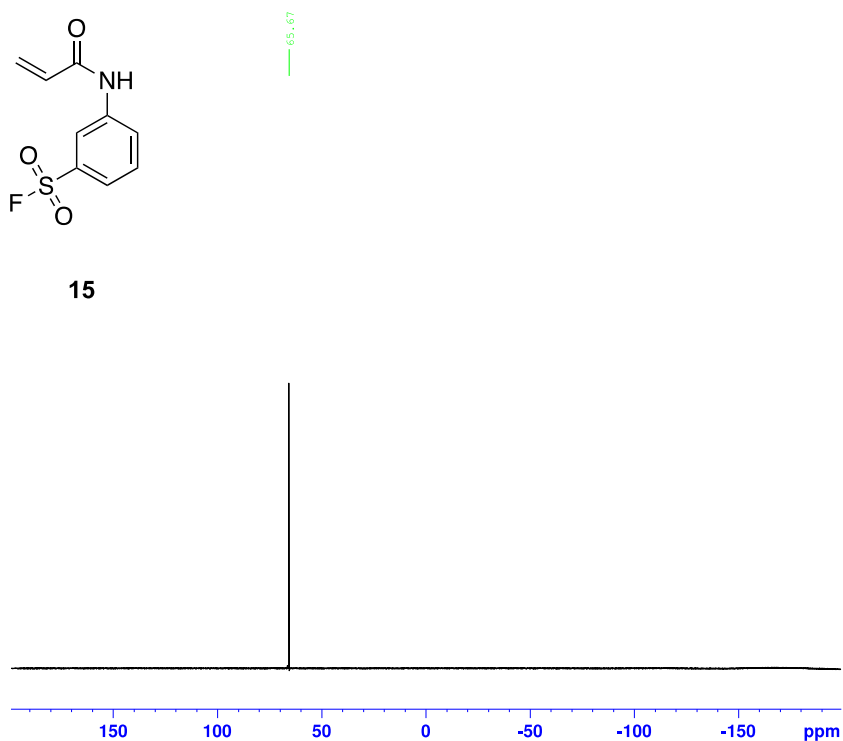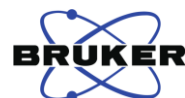

Current Data Parameters  
NAME Jian's NMRs  
EXPNO 100  
PROCNO 1

F2 - Acquisition Parameters  
Date\_ 20201028  
Time 14.08  
INSTRUM av400  
PROBHD 5 mm PABBO BB/  
PULPROG zgfhgqn.2  
TD 262144  
SOLVENT CDCl3  
NS 32  
DS 0  
SWH 150000.000 Hz  
FIDRES 0.572205 Hz  
AQ 0.8738133 sec  
RG 189.85  
DW 3.333 usec  
DE 6.50 usec  
TE 296.5 K  
D1 1.0000000 sec  
D11 0.0300000 sec  
D12 0.0000200 sec  
TD0 1

----- CHANNEL f1 -----  
SFO1 376.4983660 MHz  
NUC1 19F  
P1 14.50 usec  
PLW1 17.00000000 W

----- CHANNEL f2 -----  
SFO2 400.1324008 MHz  
NUC2 1H  
CPDPRG2 waltz16  
PCPD2 90.00 usec  
PLW2 13.00000000 W  
PLW12 0.36111000 W

F2 - Processing parameters  
SI 262144  
SF 376.4983660 MHz  
WDW EM  
SSB 0  
LB 1.00 Hz  
GB 0  
PC 1.00



# <sup>1</sup>H-NMR for 16.

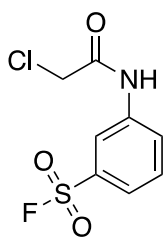

16

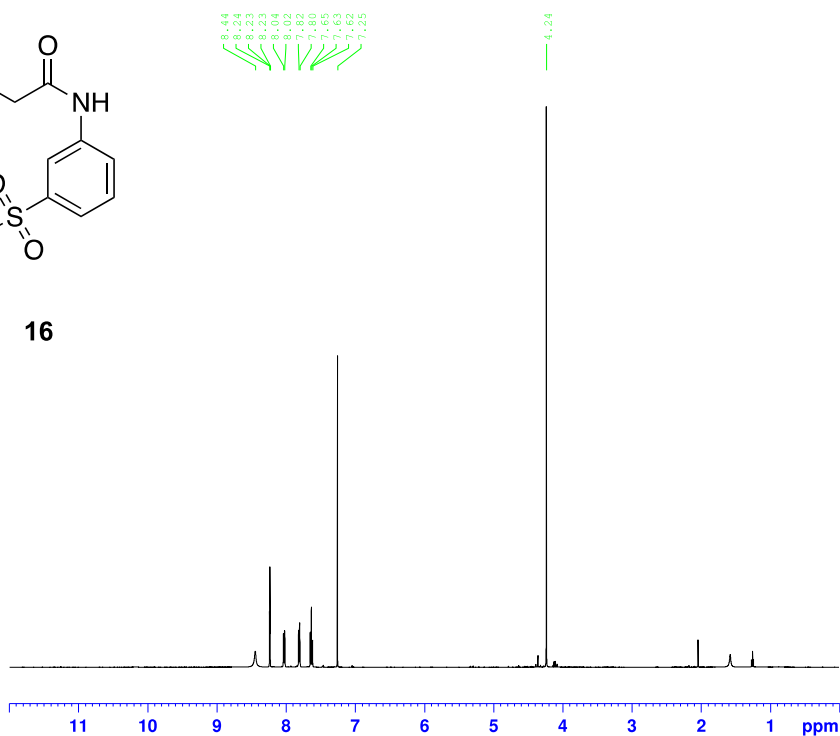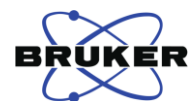

Current Data Parameters  
NAME cj\_3C1119 2  
EXNO 10  
PROCNO 1

F2 - Acquisition Parameters  
Date\_ 20200713  
Time\_ 14.43 h  
INSTRUM av500  
PROBHD Z119248\_0002 ( )  
PULPROG zg30  
TD 65536  
SOLVENT CDCl3  
NS 16  
DS 0  
SWH 10000.000 Hz  
FIDRES 0.305176 Hz  
AQ 3.2767999 sec  
RG 12.14  
DW 50.000 usec  
DE 10.00 usec  
TE 298.0 K  
D1 2.00000000 sec  
TD0 1  
SF01 500.1330008 MHz  
NUC1 1H  
P1 10.00 usec  
PLW1 13.50000000 W

F2 - Processing parameters  
SI 65536  
SF 500.1300146 MHz  
WDW EM  
SSB 0  
LB 0.30 Hz  
GB 0  
PC 1.00

**$^{13}\text{C}$ -NMR for 16.**

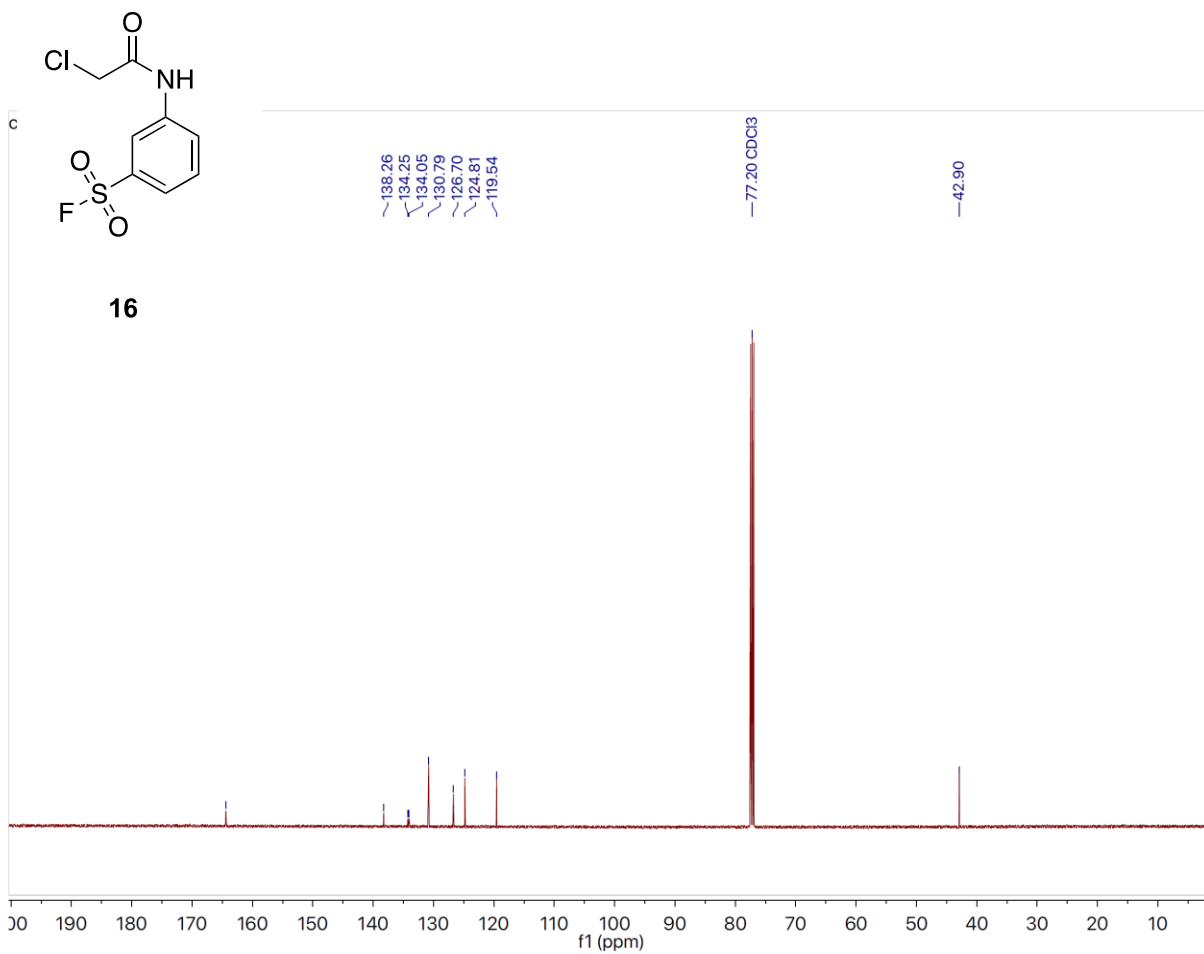

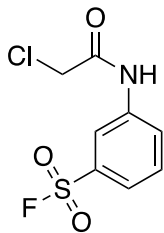

16

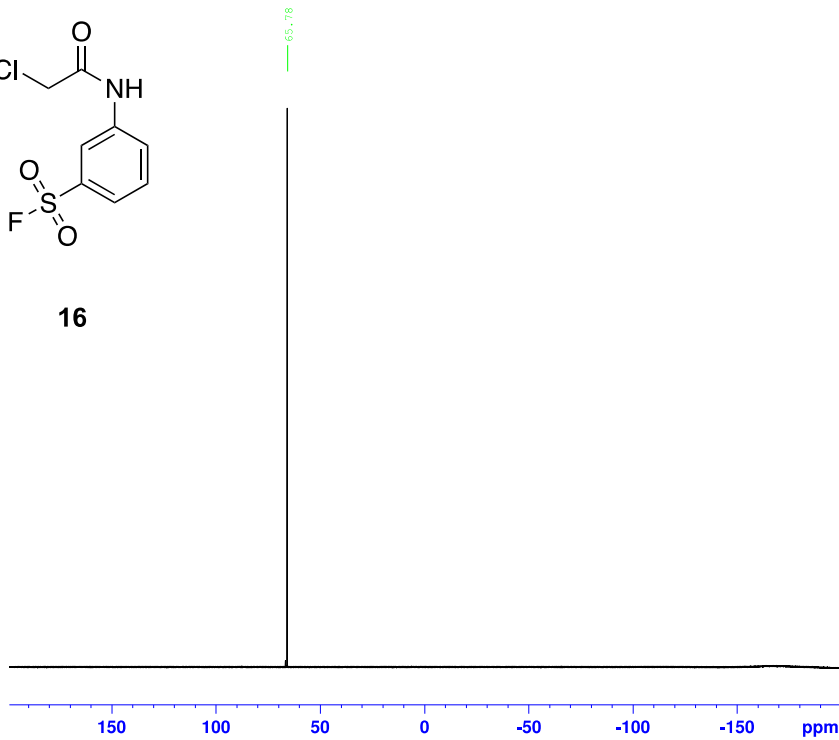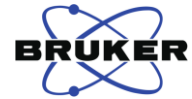

```

Current Data Parameters
NAME      Jian's NMRs
EXPNO     120
PROCNO    1

F2 - Acquisition Parameters
Date_     20201028
Time      14.20
INSTRUM   av400
PROBHD    5 mm PABBO BB/
PULPROG   zgfhiggn.2
TD        262144
SOLVENT   CDCl3
NS        32
DS        0
SWH       150000.000 Hz
FIDRES    0.572205 Hz
AQ        0.8738133 sec
RG        189.85
DW        3.333 usec
DE        6.50 usec
TE        296.5 K
D1        1.00000000 sec
D11       0.03000000 sec
D12       0.00002000 sec
TD0       1

===== CHANNEL f1 =====
SF01      376.4983660 MHz
NUC1      19F
P1        14.50 usec
PLW1      17.00000000 W

===== CHANNEL f2 =====
SF02      400.1324008 MHz
NUC2      1H
CPDPRG[2] waltz16
PCPD2     90.00 usec
PLW2      13.00000000 W
PLW12     0.36111000 W

F2 - Processing parameters
SI        262144
SF        376.4983660 MHz
WDW       EM
SSB       0
LB        1.00 Hz
GB        0
PC        1.00
  
```

# <sup>1</sup>H-NMR for 17.

May28-2020-schanger.30.fid  
Account No. YYZ620  
NBI-079\_PubQuality

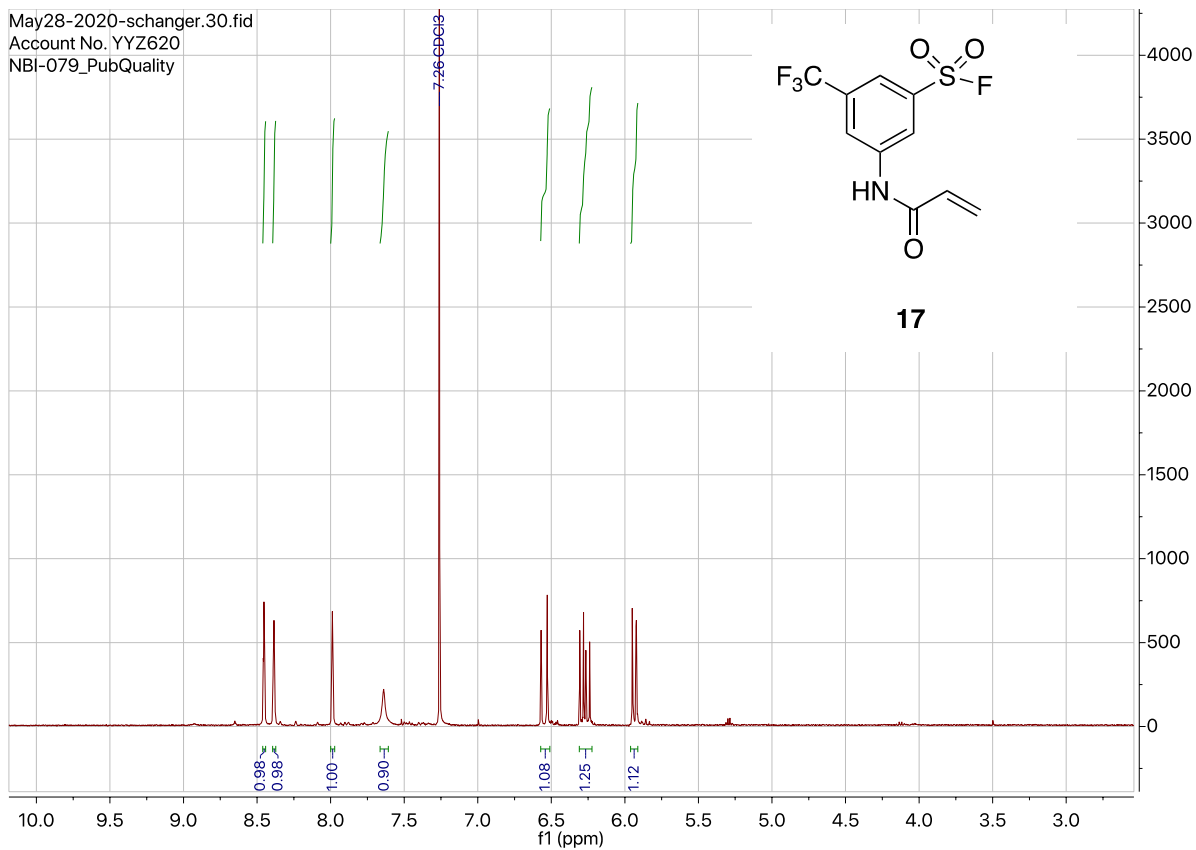

**<sup>13</sup>C-NMR for 17.**

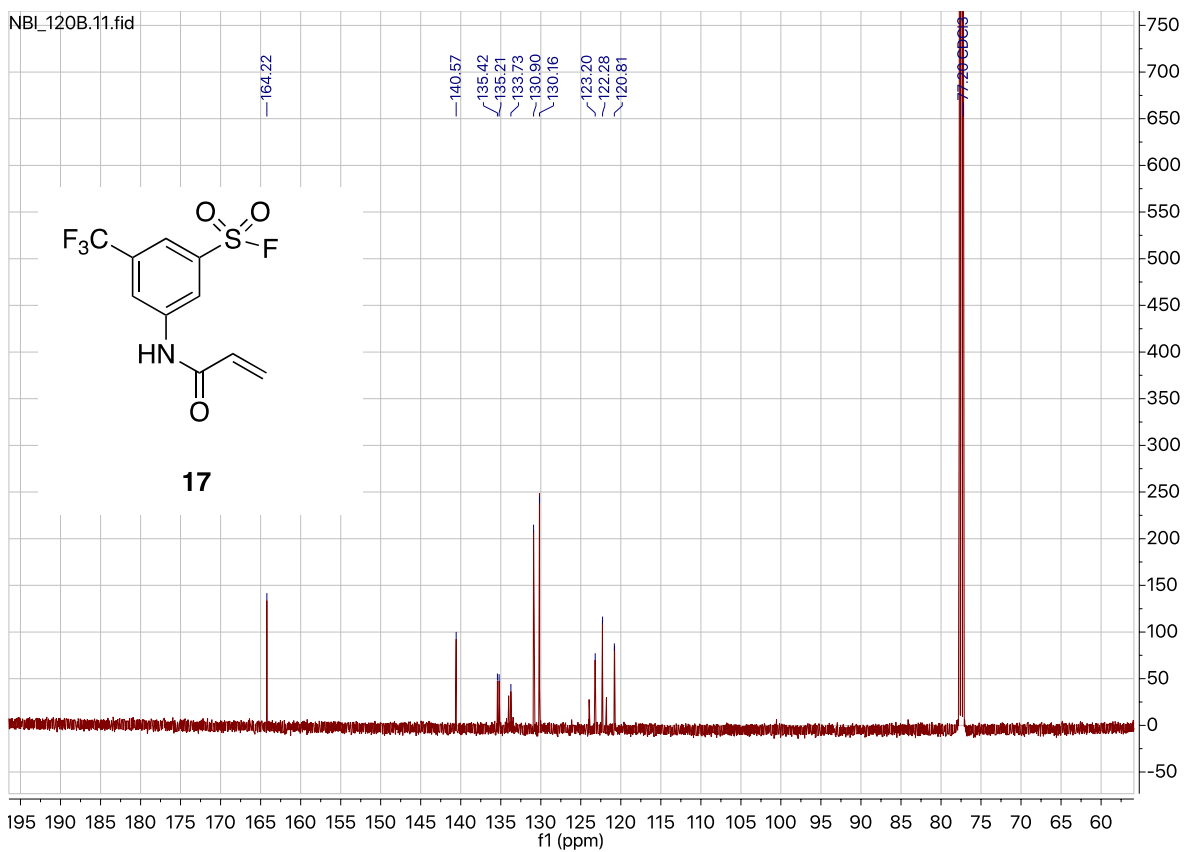

# <sup>19</sup>F-NMR for 17.

May27-2020-schanger.60.fid  
Account No. YYZ620  
NBI-079A

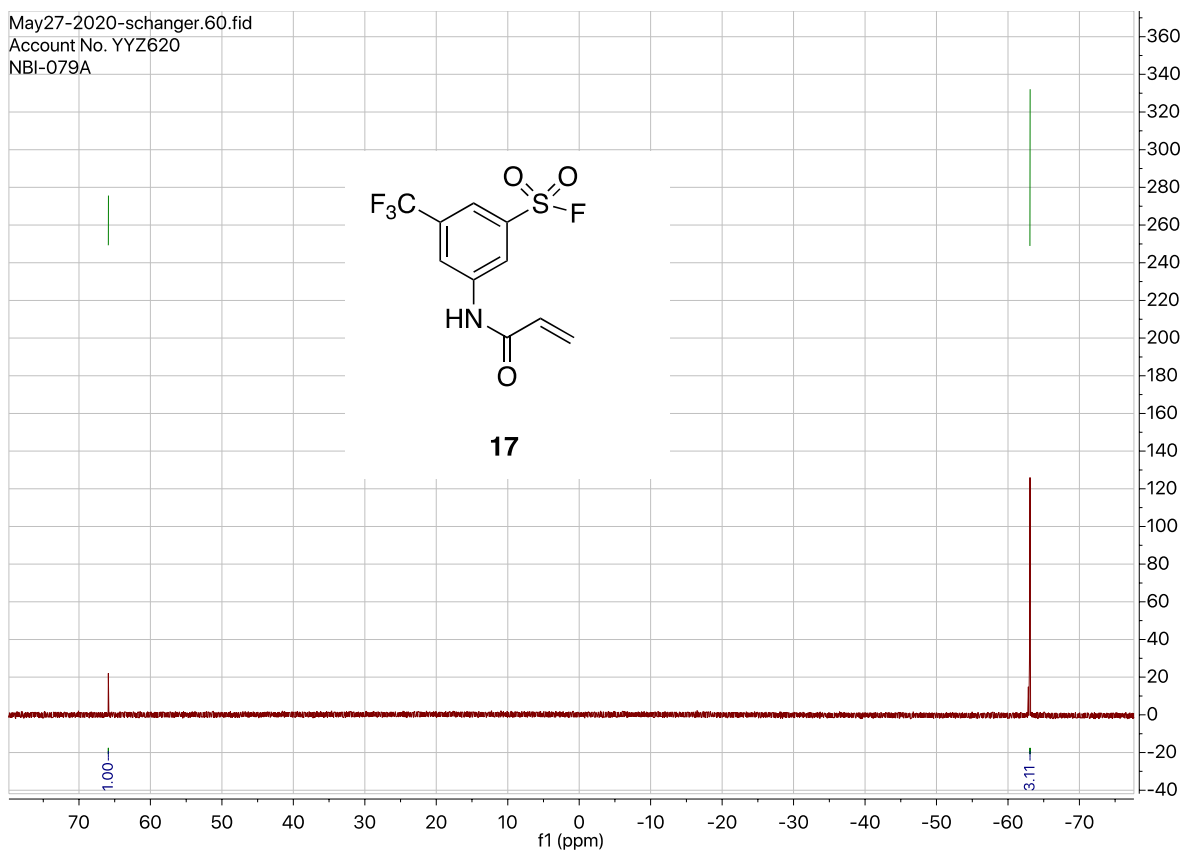

# <sup>1</sup>H-NMR for 18.

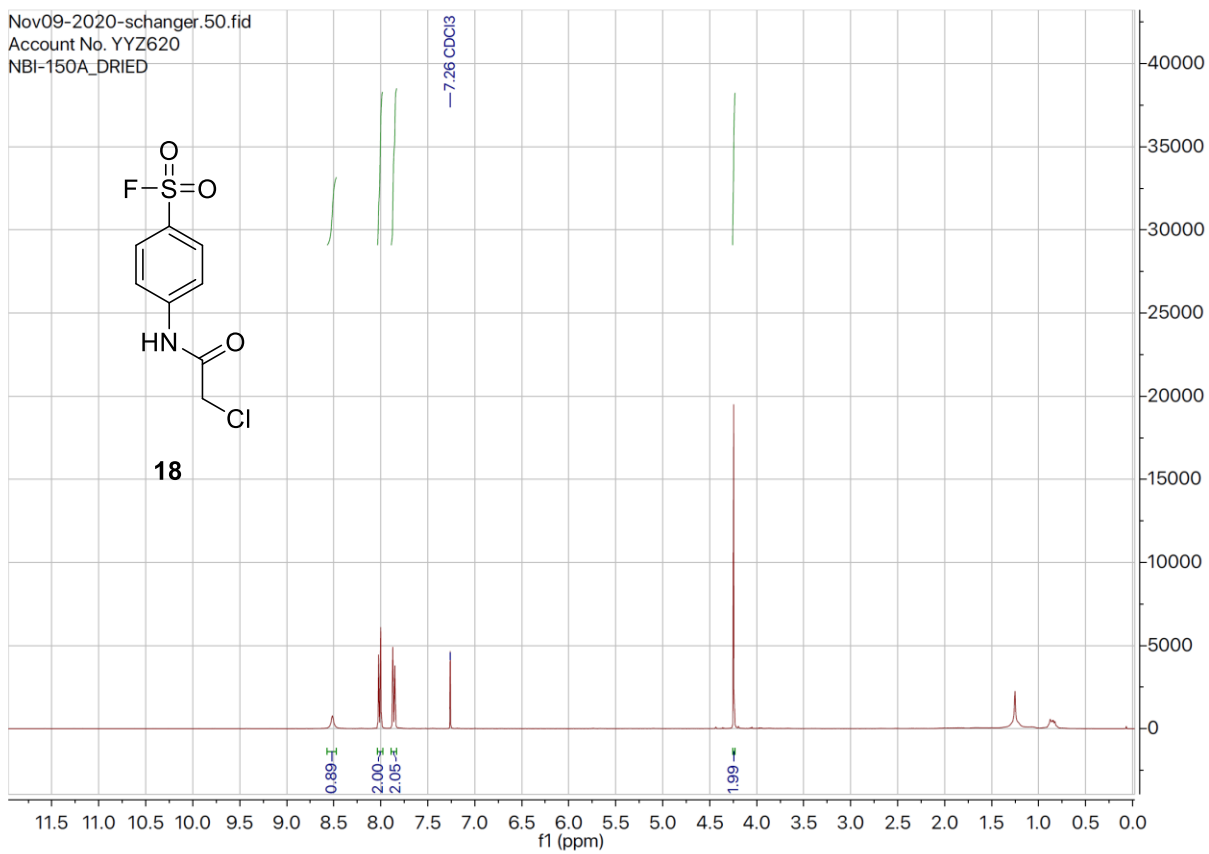

# <sup>13</sup>C-NMR for 18.

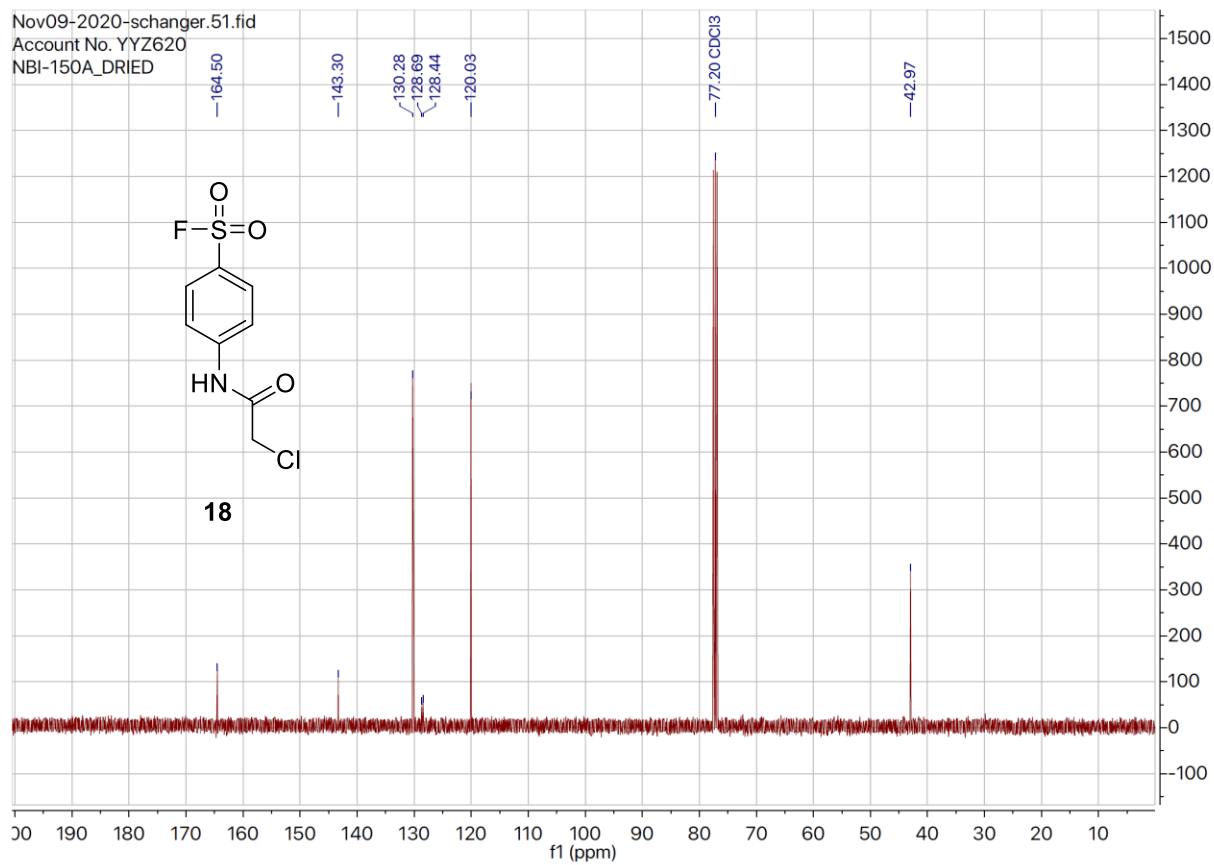



# <sup>19</sup>F-NMR for 18.

Nov06-2020-schanger.381.fid  
Account No. YYZ620  
NBI-150A

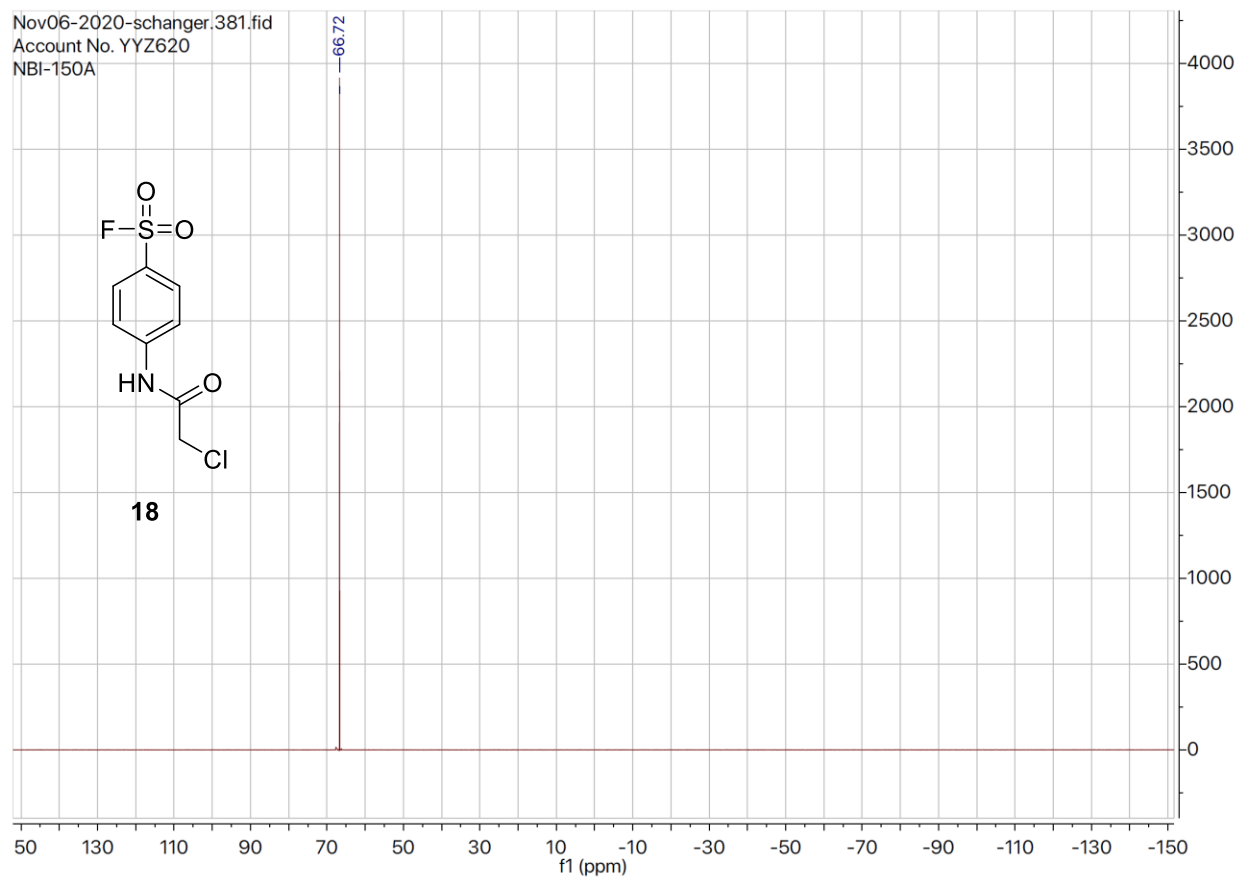

# <sup>1</sup>H-NMR for 19.

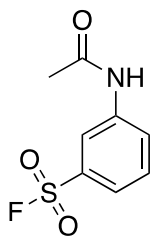

19

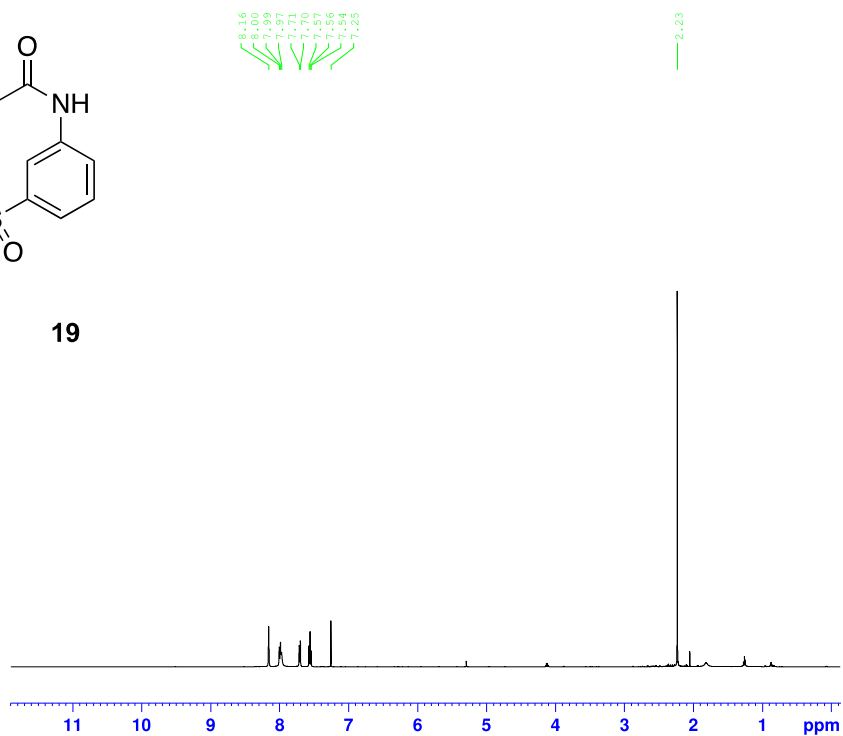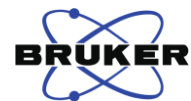

Current Data Parameters  
NAME cj\_1118\_F1  
EXPNO 10  
PROCNO 1

F2 - Acquisition Parameters  
Date\_ 20200423  
Time 14.14 h  
INSTRUM av500  
PROBHD Z119248\_0002 (zg30)  
PULPROG zg30  
TD 65536  
SOLVENT CDCl3  
NS 16  
DS 0  
SWH 10000.000 Hz  
FIDRES 0.305176 Hz  
AQ 3.2767999 sec  
RG 26.59  
DW 50.000 usec  
DE 10.00 usec  
TE 298.0 K  
D1 2.0000000 sec  
TD0 1  
SFO1 500.1330008 MHz  
NUC1 1H  
P1 10.00 usec  
PLW1 13.5000000 W

F2 - Processing parameters  
SI 65536  
SF 500.1300146 MHz  
WDW EM  
SSB 0  
LB 0.30 Hz  
GB 0  
PC 1.00

# <sup>13</sup>C-NMR for 19.

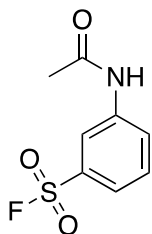

19

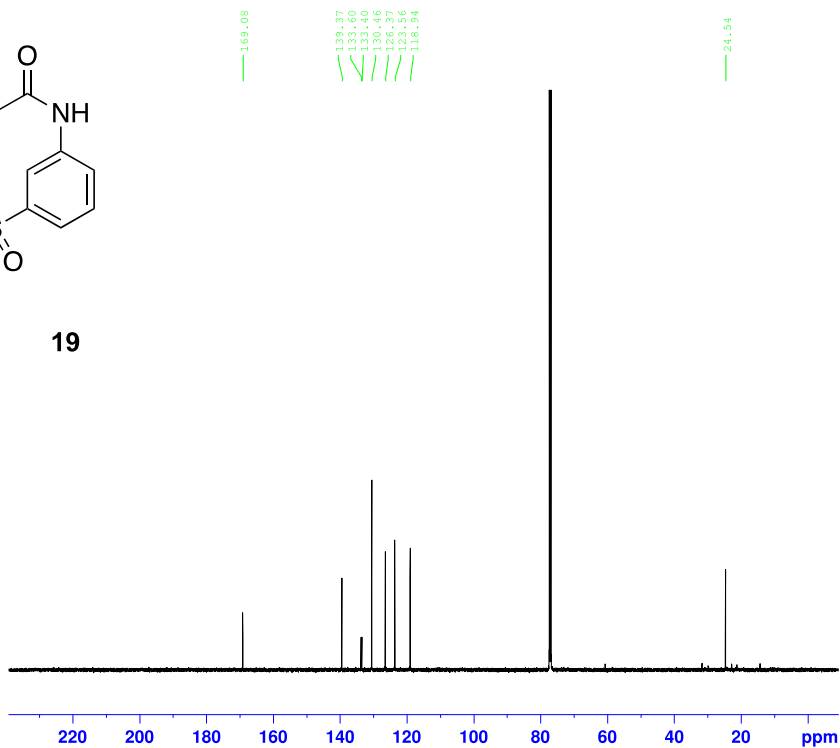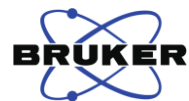

Current Data Parameters  
NAME ci\_I118\_F1  
EXPNO 11  
PROCNO 1

F2 - Acquisition Parameters  
Date\_ 20200423  
Time 14.17 h  
INSTRUM av500  
PROBHD Z119248\_0002 ( )  
PULPROG zgpg30  
TD 65536  
SOLVENT CDCl3  
NS 32  
DS 2  
SWH 31250.000 Hz  
FIDRES 0.953674 Hz  
AQ 1.0485760 sec  
RG 204.54  
DW 16.000 usec  
DE 28.00 usec  
TE 298.0 K  
D1 2.0000000 sec  
D11 0.0300000 sec  
TD0 1  
SFO1 125.7722511 MHz  
NUC1 13C  
P1 10.50 usec  
PLW1 23.0000000 W  
SFO2 500.1330008 MHz  
NUC2 1H  
CPDPRG2 waltz16  
PCPD2 80.00 usec  
PLW2 13.5000000 W  
PLW12 0.21094000 W  
PLW13 0.10610000 W

F2 - Processing parameters  
SI 131072  
SF 125.7577890 MHz  
WDW EM  
SSB 0  
LB 1.00 Hz  
GB 0  
PC 1.40

# <sup>19</sup>F-NMR for 19.

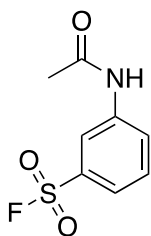

19

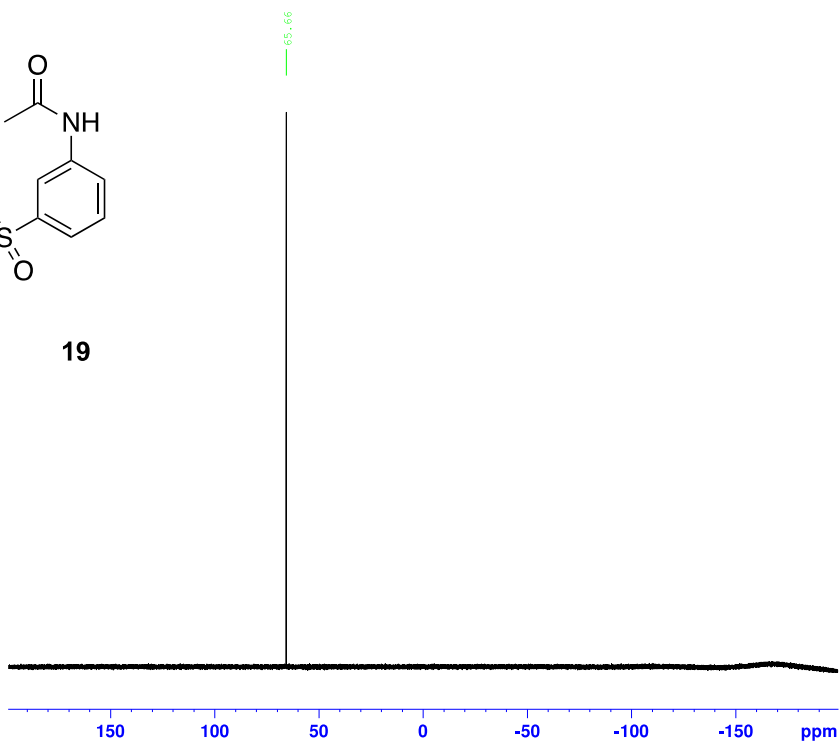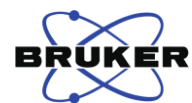

```
Current Data Parameters
NAME      Jian's NMRs
EXPNO    110
PROCNO    1

F2 - Acquisition Parameters
Date_     20201028
Time      14.15
INSTRUM   av400
PROBHD    5 mm PABBO BB/
PULPROG   zgfhigqn.2
TD         262144
SOLVENT    CDCl3
NS         32
DS         0
SWH        150000.000 Hz
FIDRES     0.572205 Hz
AQ         0.8738133 sec
RG         189.85
DW         3.333 usec
DE         6.50 usec
TE         296.5 K
D1         1.0000000 sec
D11        0.0300000 sec
D12        0.0002000 sec
TD0        1

===== CHANNEL f1 =====
SFO1      376.4983660 MHz
NUC1       19F
P1        14.50 usec
PLW1      17.0000000 W

===== CHANNEL f2 =====
SFO2      400.1324008 MHz
NUC2       1H
CPDPRG2   waltz16
PCPD2     90.00 usec
PLW2      13.0000000 W
PLW12     0.3611100 W

F2 - Processing parameters
SI         262144
SF         376.4983660 MHz
WDW        EM
SSB        0
LB         1.00 Hz
GB         0
PC         1.00
```

# <sup>1</sup>H-NMR for 20.

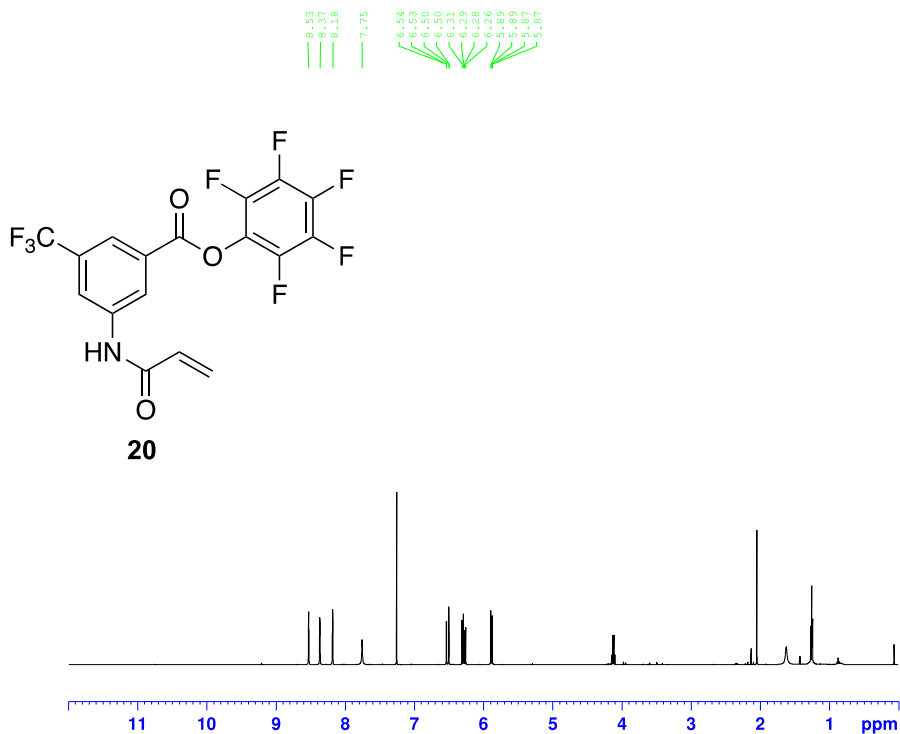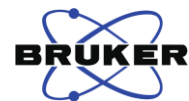

Current Data Parameters  
NAME cj\_11\_33  
EXPNO 10  
PROCNO 1

F2 - Acquisition Parameters  
Date\_ 20200814  
Time 15.29 h  
INSTRUM av500  
PROBHD Z119248\_0002 (zq30)  
PULPROG zg30  
TD 65536  
SOLVENT CDCl3  
NS 16  
DS 0  
SWH 10000.000 Hz  
FIDRES 0.305176 Hz  
AQ 3.2767999 sec  
RG 12.14  
DW 50.000 usec  
DE 10.00 usec  
TE 298.0 K  
D1 2.00000000 sec  
TD0 1  
SFO1 500.1330008 MHz  
NUC1 1H  
P1 10.00 usec  
PLW1 13.50000000 W

F2 - Processing parameters  
SI 65536  
SF 500.1300146 MHz  
WDW EM  
SSB 0  
LB 0.30 Hz  
GB 0  
PC 1.00

**<sup>13</sup>C-NMR for 20.**

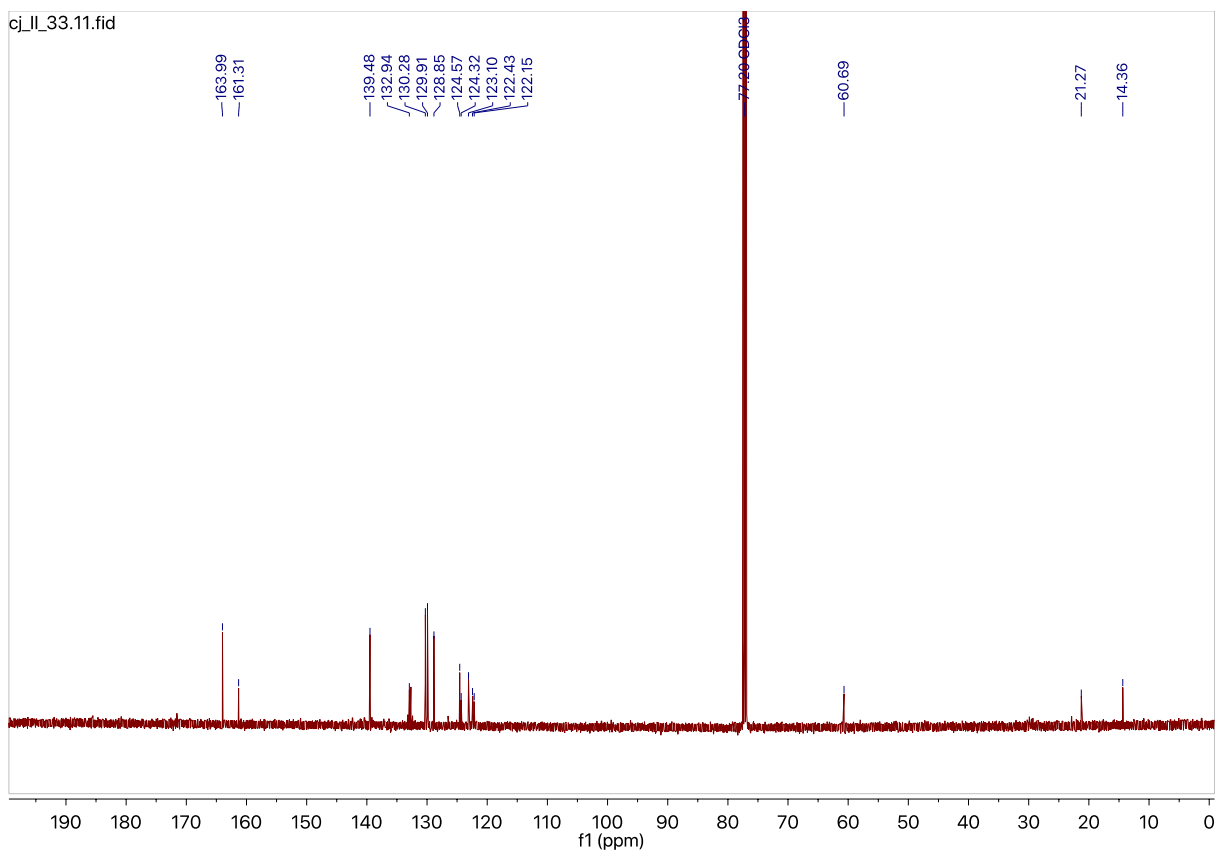

# <sup>19</sup>F-NMR for 20.

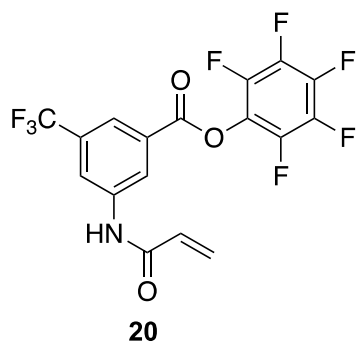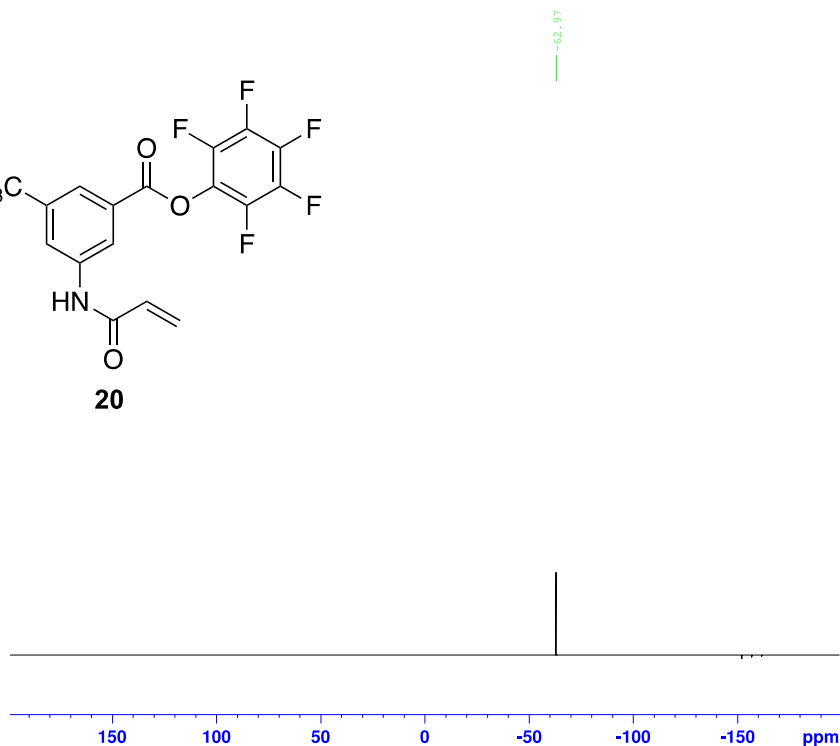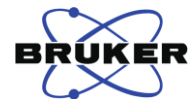

```
Current Data Parameters
NAME      Jian's NMRs
EXPNO    240
PROCNO   1

F2 - Acquisition Parameters
Date_    20201029
Time     15.48
INSTRUM  av400
PROBHD   5 mm PABBO BB/
PULPROG  zgfhigqn.2
TD       262144
SOLVENT  CDCl3
NS       32
DS       0
SWH      150000.000 Hz
FIDRES   0.572205 Hz
AQ       0.8738133 sec
RG       189.85
DW       3.333 usec
DE       6.50 usec
TE       296.6 K
D1       1.0000000 sec
D11      0.0300000 sec
D12      0.0000200 sec
TD0      1

===== CHANNEL f1 =====
SF01     376.4983660 MHz
NUC1     19F
P1       14.50 usec
PLW1     17.0000000 W

===== CHANNEL f2 =====
SF02     400.1324008 MHz
NUC2     1H
CPDPRG2  waltz16
PCPD2    90.00 usec
PLW2     13.0000000 W
PLW12    0.36111000 W

F2 - Processing parameters
SI       262144
SF       376.4983660 MHz
WDW      EM
SSB      0
LB       1.00 Hz
GB       0
PC       1.00
```

# <sup>1</sup>H-NMR for 21.

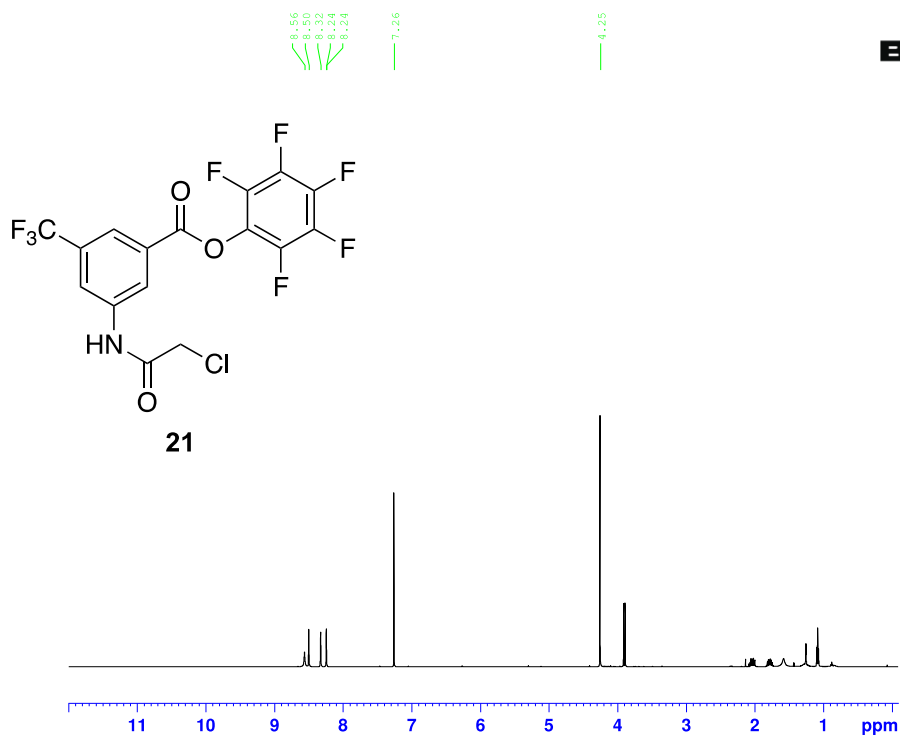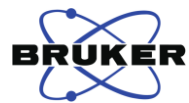

Current Data Parameters  
NAME c\_j\_11\_36  
EXPNO 10  
PROCNO 1

F2 - Acquisition Parameters  
Date\_ 20200901  
Time 14.00 h  
INSTRUM av500  
PROBHD z119248\_0002 (4  
PULPROG zg30  
TD 65536  
SOLVENT CDC13  
NS 32  
DS 0  
SWH 10000.000 Hz  
FIDRES 0.305176 Hz  
AQ 3.2767999 sec  
RG 30.07  
DW 50.000 usec  
DE 10.00 usec  
TE 298.0 K  
D1 2.00000000 sec  
TDO 1  
SFO1 500.1330008 MHz  
NUC1 1H  
P1 10.00 usec  
PLW1 13.50000000 W

F2 - Processing parameters  
SI 65536  
SF 500.1300146 MHz  
WDW EM  
SSB 0  
LB 0.30 Hz  
GB 0  
PC 1.00



# <sup>13</sup>C-NMR for 21.

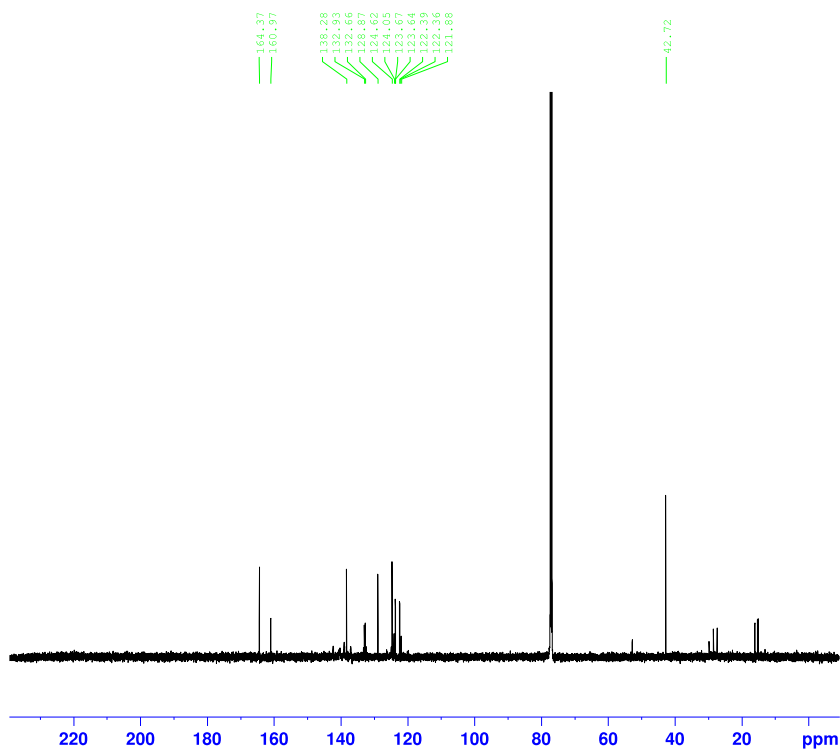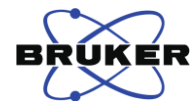

Current Data Parameters  
NAME c1\_i1\_36  
EXPNO 11  
PROCNO 1

F2 - Acquisition Parameters  
Date\_ 20200901  
Time 14.04 h  
INSTRUM av500  
PROBHD Z119248\_0002 (4  
PULPROG zgpg30  
TD 65536  
SOLVENT CDCl3  
NS 64  
DS 2  
SWH 31250.000 Hz  
FIDRES 0.953674 Hz  
AQ 1.0485760 sec  
RG 204.54  
DW 16.000 usec  
DE 28.00 usec  
TE 298.0 K  
D1 2.0000000 sec  
D11 0.0300000 sec  
TD0 1  
SFO1 125.7722511 MHz  
NUC1 13C  
P1 10.50 usec  
PLW1 23.0000000 W  
SFO2 500.1330008 MHz  
NUC2 1H  
CPDPRG2 waltz16  
PCPD2 80.00 usec  
PLW2 13.5000000 W  
PLW12 0.21094000 W  
PLW13 0.10610000 W

F2 - Processing parameters  
SI 131072  
SF 125.7577890 MHz  
WDW EM  
SSB 0  
LB 1.00 Hz  
GB 0  
PC 1.40

# <sup>19</sup>F-NMR for 21.

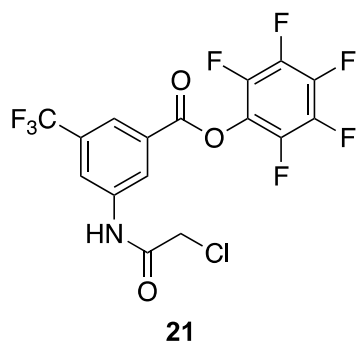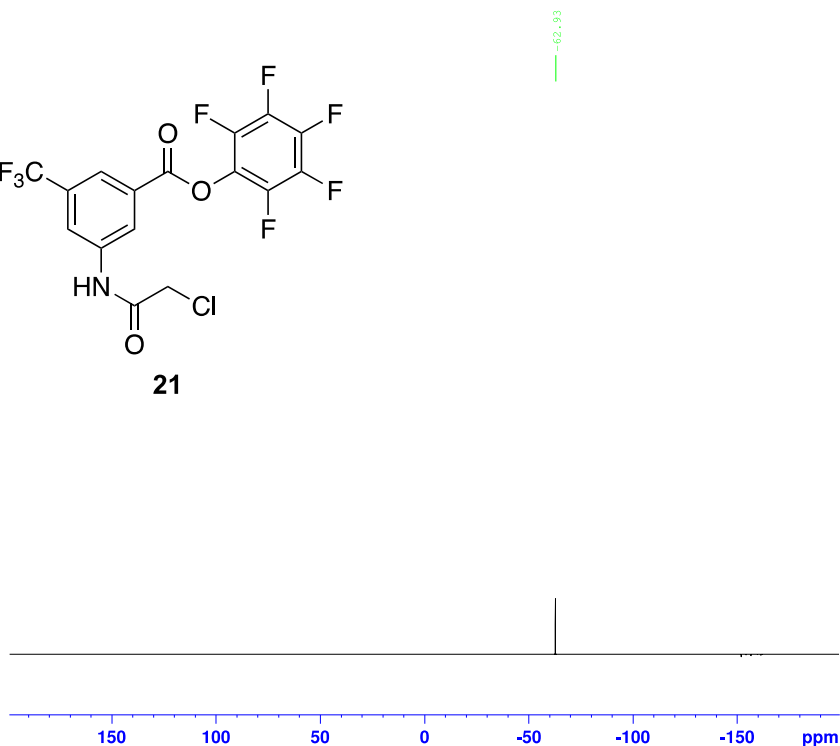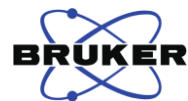

Current Data Parameters  
NAME Jian's NMRs  
EXPNO 250  
PROCNO 1

F2 - Acquisition Parameters  
Date\_ 20201029  
Time 15.54  
INSTRUM av400  
PROBHD 5 mm PABBO BB/  
PULPROG zgfhgqn.2  
TD 262144  
SOLVENT CDCl3  
NS 32  
DS 0  
SWH 150000.000 Hz  
FIDRES 0.572205 Hz  
AQ 0.8738133 sec  
RG 189.85  
DW 3.333 usec  
DE 6.50 usec  
TE 296.6 K  
D1 1.00000000 sec  
D11 0.03000000 sec  
D12 0.00002000 sec  
TDD 1

===== CHANNEL f1 =====  
SFO1 376.4983660 MHz  
NUC1 19F  
P1 14.50 usec  
PLW1 17.00000000 W

===== CHANNEL f2 =====  
SFO2 400.1324008 MHz  
NUC2 1H  
CPDPRG[2] waltz16  
PCPD2 90.00 usec  
PLW2 13.00000000 W  
PLW12 0.36111000 W

F2 - Processing parameters  
SI 262144  
SF 376.4983660 MHz  
WDW EM  
SSB 0  
LB 1.00 Hz  
GB 0  
PC 1.00

# <sup>1</sup>H-NMR for 22.

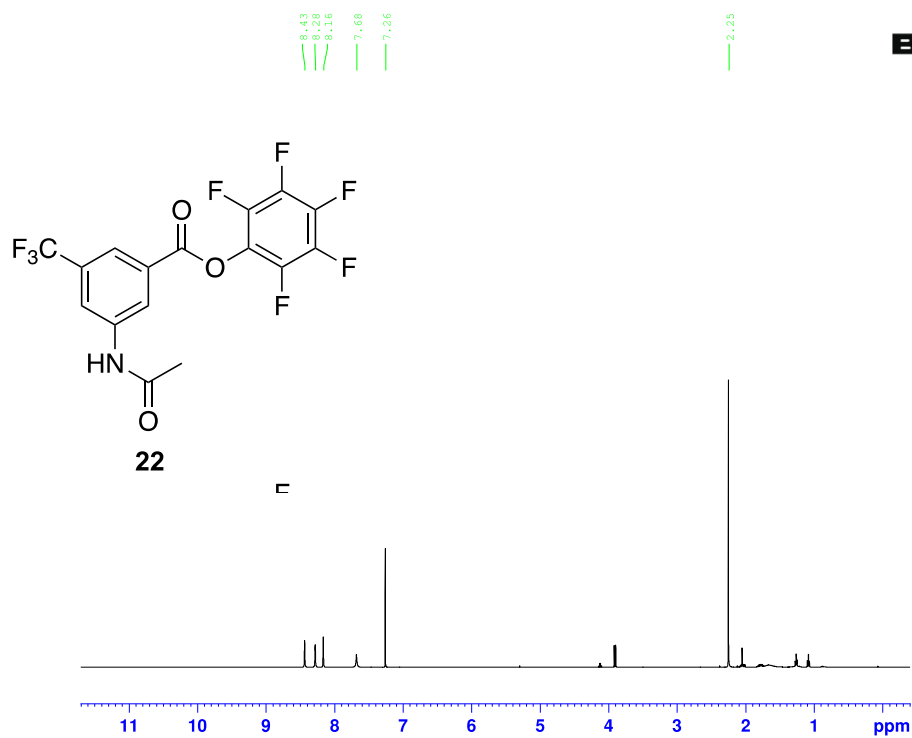

Current Data Parameters  
NAME cj\_ii\_38  
EXPNO 10  
PROCNO 1

F2 - Acquisition Parameters  
Date\_ 20200901  
Time 13.50 h  
INSTRUM av500  
PROBHD z119248\_0002 f  
PULPROG zg30  
TD 65536  
SOLVENT CDC13  
NS 16  
DS 0  
SWH 10000.000 Hz  
FIDRES 0.305176 Hz  
AQ 3.2767999 sec  
RG 12.14  
DW 50.000 usec  
DE 10.00 usec  
TE 298.0 K  
D1 2.00000000 sec  
TDO 1  
SFO1 500.1330008 MHz  
NUC1 1H  
P1 10.00 usec  
PLW1 13.50000000 W

F2 - Processing parameters  
SI 65536  
SF 500.1300146 MHz  
WDW EM  
SSB 0  
LB 0.30 Hz  
GB 0  
PC 1.00

<sup>13</sup>C-NMR for 22.

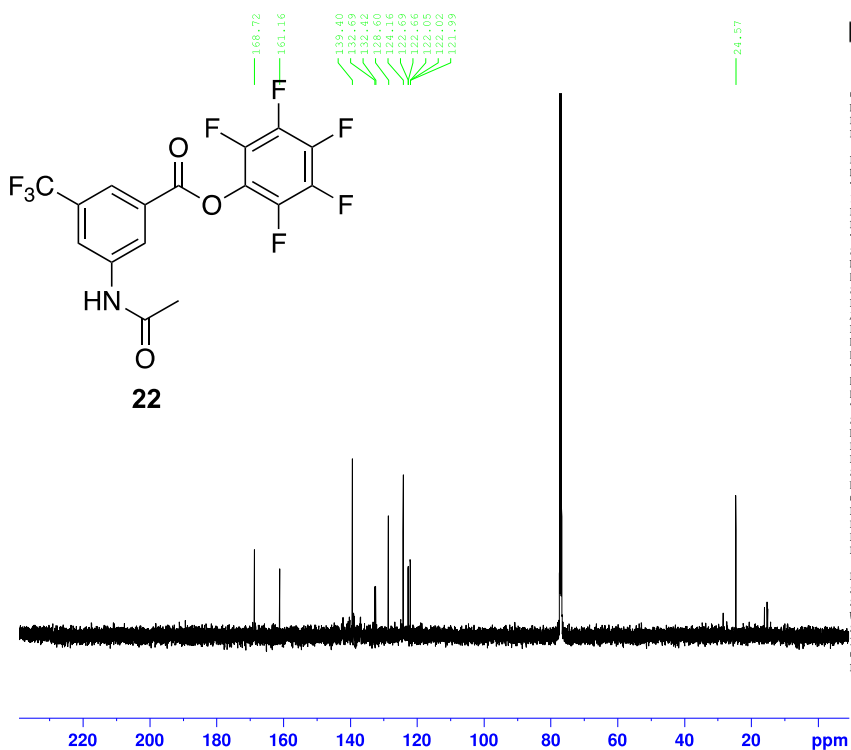

```

Current Data Parameters
NAME      cj_f1_38
EXPNO    11
PROCNO   1

F2 - Acquisition Parameters
Date_    20200901
Time     13.54 h
INSTRUM  av500
PROBHD   Z119248_0002 (
PULPROG  zgpg30
TD       65536
SOLVENT  CDCl3
NS       32
DS       2
SWH      31250.000 Hz
FIDRES   0.953674 Hz
AQ       1.0485760 sec
RG       204.54
DW       16.000 usec
DE       28.00 usec
TE       298.0 K
D1       2.00000000 sec
D11      0.03000000 sec
TD0      1
SFO1     125.7722511 MHz
NUC1     13C
P1       10.50 usec
PLN1     23.00000000 W
SFO2     500.1330008 MHz
NUC2     1H
CPDPRG2  waltz16
PCPD2    80.00 usec
PLN2     13.50000000 W
PLW12    0.21094000 W
PLW13    0.10610000 W

F2 - Processing parameters
SI       131072
SF       125.7577890 MHz
WDW      EM
SSB      0
LB       1.00 Hz
GB       0
FC       1.40
    
```

# <sup>19</sup>F-NMR for 22.

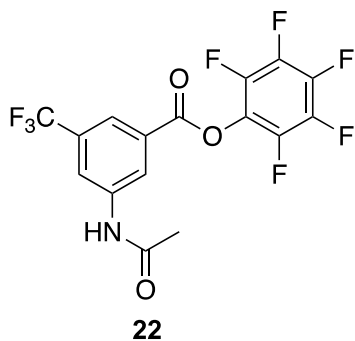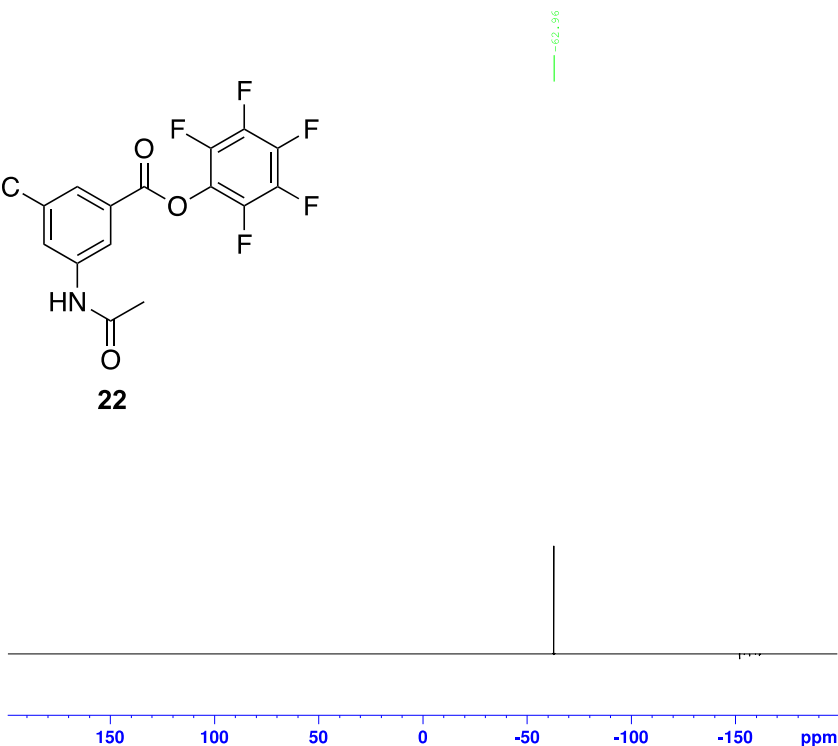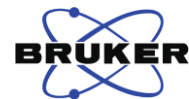

```
Current Data Parameters
NAME      Jian's NMRs
EXPNO    260
PROCNO    1

F2 - Acquisition Parameters
Date_    20201029
Time     16.01
INSTRUM  av400
PROBHD   5 mm PABBO BB/
PULPROG  zgfhigqn.2
TD       262144
SOLVENT  CDCl3
NS       32
DS       0
SWH      150000.000 Hz
FIDRES   0.572205 Hz
AQ       0.8738133 sec
RG       189.85
DW       3.333 usec
DE       6.50 usec
TE       296.6 K
D1       1.00000000 sec
D11      0.03000000 sec
D12      0.00002000 sec
TD0      1

===== CHANNEL f1 =====
SFO1    376.4983660 MHz
NUC1    19F
P1      14.50 usec
PLW1    17.00000000 W

===== CHANNEL f2 =====
SFO2    400.1324008 MHz
NUC2    1H
CPDPRG2  waltz16
PCPD2   90.00 usec
PLW2    13.00000000 W
PLW12   0.36111000 W

F2 - Processing parameters
SI      262144
SF      376.4983660 MHz
WDW     EM
SSB     0
LB      1.00 Hz
GB      0
PC      1.00
```

**(G) References.**

- (1) Posch, A.; Kohn, J.; Oh, K.; Hammond, M.; Liu, N. *J. Vis. Exp.* **2013**, 82 (82), 50948.
- (2) Hughes, C. S.; Moggridge, S.; Müller, T.; Sorensen, P. H.; Morin, G. B.; Krijgsveld, J. *Nat. Protoc.* **2019**, 14 (1), 68.
- (3) Weerapana, E.; Wang, C.; Simon, G. M.; Richter, F.; Khare, S.; Dillon, M. B. D.; Bachovchin, D. A.; Mowen, K.; Baker, D.; Cravatt, B. F. *Nature* **2010**, 468 (7325), 790.
- (4) Backus, K. M.; Correia, B. E.; Lum, K. M.; Forli, S.; Horning, B. D.; González-Páez, G. E.; Chatterjee, S.; Lanning, B. R.; Teijaro, J. R.; Olson, A. J.; Wolan, D. W.; Cravatt, B. F. *Nature* **2016**, 534 (7608), 570.
- (5) Xu, J. H.; Eberhardt, J.; Hill-Payne, B.; González-Páez, G. E.; Castellón, J. O.; Cravatt, B. F.; Forli, S.; Wolan, D. W.; Backus, K. M. *ACS Chem. Biol.* **2020**, 15 (2), 575.
- (6) Lima, D. B.; de Lima, T. B.; Balbuena, T. S.; Neves-Ferreira, A. G. C.; Barbosa, V. C.; Gozzo, F. C.; Carvalho, P. C. *J. Proteomics* **2014**, 129, 51.
- (7) Gao, Z.; Gouverneur, V.; Davis, B. G. *J. Am. Chem. Soc.* **2013**, 135 (37), 13612.
- (8) Liu, W.; Hua, J.; Zhou, J.; Zhang, H.; Zhu, H.; Cheng, Y.; Gust, R. *Bioorganic Med. Chem. Lett.* **2012**, 22 (15), 5008.
- (9) Boskovic, Z. V.; Kemp, M. M.; Freedy, A. M.; Viswanathan, V. S.; Pop, M. S.; Fuller, J. H.; Martinez, N. M.; Figueroa Lazú, S. O.; Hong, J. A.; Lewis, T. A.; Calarese, D.; Love, J. D.; Vetere, A.; Almo, S. C.; Schreiber, S. L.; Koehler, A. N. *ACS Chem. Biol.* **2016**, 11 (7), 1844.
- (10) Khalily, M. A.; Gulseren, G.; Tekinay, A. B.; Guler, M. O. *Bioconjug. Chem.* **2015**, 26 (12), 2371.
- (11) Nödling, A. R.; Świderek, K.; Castillo, R.; Hall, J. W.; Angelastro, A.; Morrill, L. C.; Jin, Y.; Tsai, Y. H.; Moliner, V.; Luk, L. Y. P. *Angew. Chemie - Int. Ed.* **2018**, 57 (38), 12478.
- (12) Tian, D. mei; Qiao, J.; Bao, Y. zhou; Liu, J.; Zhang, X. kun; Sun, X. long; Zhang, Y. wei; Yao, X. sheng; Tang, J. shan. *Bioorganic Med. Chem. Lett.* **2019**, 29 (5), 707.
